# Supplementary material for: Catalytic asymmetric inverse electron demand Diels–Alder reaction of fulvenes with azoalkenes
Source: Royal Society of Chemistry journal article supplement (doi:10.1039/c7cc09896k), 2018-01-01
Supplement: c7cc09896k1.pdf [file c7cc09896k1.pdf]

*Electronic Supplementary Information for*

## **Catalytic Asymmetric Inverse Electron Demand Diels-Alder Reaction of Fulvenes with Azoalkenes**

Liang Wei, Qiao Zhu, Zhi-Min Song, Kang Liu, Chun-Jiang Wang\*

### Table of Contents

|   |                                                                                                                                       |    |
|---|---------------------------------------------------------------------------------------------------------------------------------------|----|
| 1 | General Remarks .....                                                                                                                 | 2  |
| 2 | General Procedure for Catalytic Asymmetric IEDDA reaction of Fulvene with Azoalkenes<br>Catalyzed by Cu(I)/ <sup>t</sup> Bu-Box ..... | 2  |
| 3 | Synthetic Transformations .....                                                                                                       | 12 |
| 4 | References .....                                                                                                                      | 14 |
| 5 | NMR and HPLC spectra .....                                                                                                            | 15 |

## 1 General Remarks

<sup>1</sup>H NMR spectra were recorded on a Bruker 400 MHz spectrometer in CDCl<sub>3</sub>. Chemical shifts are reported in ppm with the internal TMS signal at 0.0 ppm as a standard. The data are reported as (s = single, d = double, t = triple, q = quartet, m = multiple or unresolved, and brs = broad single). <sup>13</sup>C NMR spectra were recorded on a Bruker 75 MHz or 100 MHz spectrometer in CDCl<sub>3</sub>. Chemical shifts are reported in ppm with the internal chloroform signal at 77.0 ppm as a standard. Commercially available reagents were used without further purification. All reactions were monitored by TLC with silica gel-coated plates. Diastereomeric ratios were determined from crude <sup>1</sup>H NMR or HPLC analysis. Enantiomeric ratios were determined by HPLC, using a chiralpak AS-H column, a chiralpak IC-H column or a chiralcel IE-H column with hexane and *i*-PrOH as solvents, and Azoalkenes<sup>1</sup> and fulvene<sup>2</sup> were prepared according to the literature procedure. The absolute configuration of **3f** were determined unequivocally according to the X-ray diffraction analysis, and those of other adducts were deduced on the basis of these results.

## 2 General Procedure for Catalytic Asymmetric IEDDA reaction of Fulvene with Azoalkenes Catalyzed by Cu(I)/Bu-Box

Under argon atmosphere, <sup>t</sup>Bu-Box (6.5 mg, 0.022 mmol) and CuOTf•1/2 PhH (5.0 mg, 0.020 mmol) were dissolved in 1.0 mL of DCM, and stirred at room temperature for about 0.5 h. After the reaction temperature was dropped to -20 °C, α-halogeno-hydrozone **2** (0.2 mmol), Na<sub>2</sub>CO<sub>3</sub> (0.5 mmol) were added sequentially. Then, the fulvene **1** (0.3 mmol) in 1.0 mL of DCM was added. Once starting material was consumed (monitored by TLC), the organic solvent was removed and the residue was purified by column chromatography to give the cycloaddition product, which was then directly analyzed by HPLC to determine the enantiomeric excess.

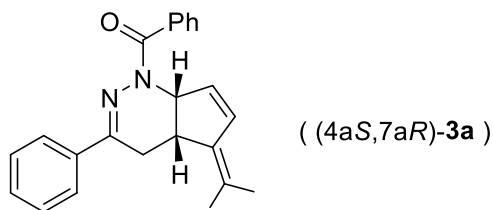

**(4a*S*,7a*R*)-phenyl(3-phenyl-5-(propan-2-ylidene)-4,4a,5,7a-tetrahydro-1H-**

**cyclopenta[*c*]pyridazin-1-yl)methanone (table 2, entry 1):** Yield (73%); white solid; m.p. = 126 °C;  $[\alpha]_D^{20} = -591.0$  (*c* 0.23, CH<sub>2</sub>Cl<sub>2</sub>); <sup>1</sup>H NMR (400 MHz, CDCl<sub>3</sub>) δ 7.76 – 7.73 (m, 2H), 7.58 – 7.56 (m, 2H), 7.42 – 7.31 (m, 6H), 6.51 – 6.49 (m, 1H), 6.20 (d, *J* = 5.2 Hz, 1H), 5.54 (d, *J* = 7.2 Hz, 1H), 3.26 – 3.20 (m, 1H), 2.93 – 2.87 (m, 1H), 2.30 – 2.24 (m, 1H), 1.86 (s, 3H), 1.82 (s, 3H). <sup>13</sup>C NMR (101 MHz, CDCl<sub>3</sub>) δ 171.7, 151.1, 140.6, 136.6, 135.5, 134.0, 131.7, 130.3, 129.9, 129.3, 128.4, 127.3, 125.6, 124.0, 58.7, 36.0, 26.0, 21.1, 20.8. HRMS (ESI+) Calcd. For C<sub>23</sub>H<sub>23</sub>N<sub>2</sub>O ([M+H]<sup>+</sup>): 343.1805, found: 343.1798. The product was analyzed by HPLC to determine the enantiomeric excess: 98% ee (Chiralpak AS-H, *i*-propanol /hexane = 20/80, flow rate 1.0 mL/min, λ = 254 nm); t<sub>r</sub> = 7.13 and 10.43 min.

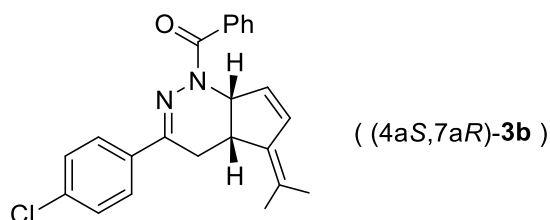

**(4a*S*,7a*R*)-(3-(4-chlorophenyl)-5-(propan-2-ylidene)-4,4a,5,7a-tetrahydro-1H-**

**cyclopenta[*c*]pyridazin-1-yl)(phenyl)methanone (table 2, entry 2):** Yield (80%); white solid; m.p. = 138 °C;  $[\alpha]_D^{20} = -612.5$  (*c* 0.23, CH<sub>2</sub>Cl<sub>2</sub>); <sup>1</sup>H NMR (400 MHz, CDCl<sub>3</sub>) δ 7.73 – 7.70 (m, 2H), 7.50 – 7.39 (m, 5H), 7.29 – 7.26 (m, 2H), 6.51 – 6.49 (m, 1H), 6.19 (d, *J* = 5.6 Hz, 1H), 5.52 (d, *J* = 7.6 Hz, 1H), 3.24 – 3.18 (m, 1H), 2.89 – 2.83 (m, 1H), 2.25 – 2.18 (m, 1H), 1.86 (s, 3H), 1.82 (s, 3H). <sup>13</sup>C NMR (101 MHz, CDCl<sub>3</sub>) δ 171.7, 149.3, 140.5, 135.4, 135.2, 135.1, 134.0, 131.6, 130.4, 129.9, 128.6, 127.3, 126.8, 124.1, 58.5, 35.7, 25.8, 21.2, 20.8. HRMS (ESI+) Calcd. For C<sub>23</sub>H<sub>22</sub>ClN<sub>2</sub>O ([M+H]<sup>+</sup>): 377.1415, found: 377.1407. The product was analyzed by HPLC to determine the enantiomeric excess: 96% ee (Chiralpak AS-H, *i*-propanol /hexane = 20/80, flow rate 1.0 mL/min, λ = 254 nm); t<sub>r</sub> = 6.31 and 9.27 min.

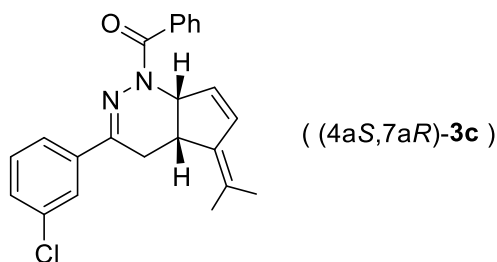

**(4a*S*,7a*R*)-(3-(3-chlorophenyl)-5-(propan-2-ylidene)-4,4a,5,7a-tetrahydro-1H-cyclopenta[c]pyridazin-1-yl)(phenyl)methanone (table 2, entry 3):** Yield (89%); white solid; m.p. = 122 °C;  $[\alpha]_D^{20} = -148.9$  (*c* 0.23, CH<sub>2</sub>Cl<sub>2</sub>); <sup>1</sup>H NMR (400 MHz, CDCl<sub>3</sub>) δ 7.74 – 7.72 (m, 2H), 7.54–7.41 (m, 5H), 7.26 – 7.23 (m, 2H), 6.51 – 6.49 (m, 1H), 6.20 (d, *J* = 5.2 Hz, 1H), 5.52 (d, *J* = 8.0 Hz, 1H), 3.23– 3.17 (m, 1H), 2.89 – 2.83 (m, 1H), 2.23 – 2.16 (m, 1H), 1.87 (s, 3H), 1.83 (s, 3H). <sup>13</sup>C NMR (101 MHz, CDCl<sub>3</sub>) δ 171.7, 148.7, 140.4, 138.5, 135.3, 134.5, 134.1, 131.6, 130.4, 129.9, 129.7, 129.1, 127.4, 125.8, 124.2, 123.6, 58.4, 35.5, 25.8, 21.2, 20.8. HRMS (ESI+) Calcd. For C<sub>23</sub>H<sub>22</sub>ClN<sub>2</sub>O ([M+H]<sup>+</sup>): 377.1415, found: 377.1400. The product was analyzed by HPLC to determine the enantiomeric excess: 92% ee (Chiralpak AS-H, *i*-propanol /hexane = 20/80, flow rate 1.0 mL/min, λ = 254 nm); t<sub>r</sub> = 6.34 and 8.90 min.

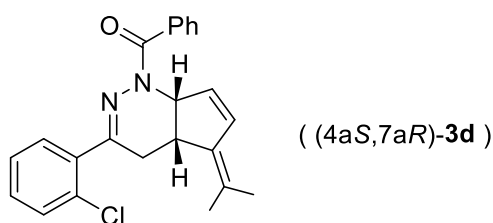

**(4a*S*,7a*R*)-(3-(2-chlorophenyl)-5-(propan-2-ylidene)-4,4a,5,7a-tetrahydro-1H-cyclopenta[c]pyridazin-1-yl)(phenyl)methanone (table 2, entry 4):** Yield (93%); white solid; m.p. = 132 °C;  $[\alpha]_D^{20} = -377.8$  (*c* 0.23, CH<sub>2</sub>Cl<sub>2</sub>); <sup>1</sup>H NMR (400 MHz, CDCl<sub>3</sub>) δ 7.74 – 7.72 (m, 2H), 7.42 – 7.35 (m, 4H), 7.29 – 7.22 (m, 3H), 6.54– 6.52 (m, 1H), 6.25 (d, *J* = 5.6 Hz, 1H), 5.49 (d, *J* = 7.6 Hz, 1H), 3.34 – 3.28 (m, 1H), 2.92 – 2.87 (m, 1H), 2.24 – 2.17 (m, 1H), 1.80 (s, 3H), 1.81 (s, 3H). <sup>13</sup>C NMR (101 MHz, CDCl<sub>3</sub>) δ 172.4, 154.5, 140.2, 137.4, 135.4, 133.8, 132.4, 131.8, 130.5, 130.02, 129.95, 129.9, 127.4, 127.0, 124.2, 59.9, 36.9, 30.4, 21.0, 20.9. HRMS (ESI+) Calcd. For C<sub>23</sub>H<sub>22</sub>ClN<sub>2</sub>O ([M+H]<sup>+</sup>): 377.1415, found: 377.1407. The product was analyzed by HPLC to determine the enantiomeric excess: 97% ee (Chiralpak AS-H, *i*-propanol /hexane = 20/80, flow rate 1.0 mL/min, λ = 254 nm); t<sub>r</sub> = 7.28 and 10.22 min.

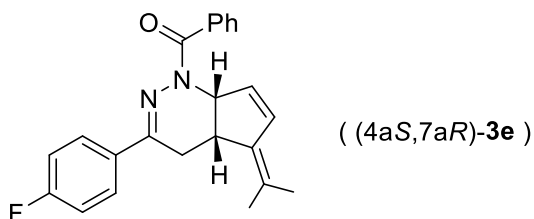

**(4a*S*,7a*R*)-(3-(4-fluorophenyl)-5-(propan-2-ylidene)-4,4a,5,7a-tetrahydro-1H-**

**cyclopenta[c]pyridazin-1-yl)(phenyl)methanone (table 2, entry 5):** Yield (93%); white solid; m.p. = 124 °C;  $[\alpha]_D^{20} = -654.8$  (*c* 0.23, CH<sub>2</sub>Cl<sub>2</sub>); <sup>1</sup>H NMR (400 MHz, CDCl<sub>3</sub>) δ 7.74 – 7.72 (m, 2H), 7.58 – 7.41 (m, 5H), 7.03–6.98 (m, 2H), 6.52 – 6.50 (m, 1H), 6.20 (d, *J* = 5.2 Hz, 1H), 5.55 – 5.53 (m, 1H), 3.27 – 3.21 (m, 1H), 2.90 – 2.84 (m, 1H), 2.29 – 2.22 (m, 1H), 1.87 (s, 3H), 1.83 (s, 3H). <sup>13</sup>C NMR (101 MHz, CDCl<sub>3</sub>) δ 171.6, 164.7, 162.2, 149.9, 140.5, 135.5, 134.0, 132.79, 132.76, 131.7, 129.8, 127.5, 127.4, 127.3, 124.0, 115.5, 115.3, 58.5, 35.9, 26.0, 21.1, 20.8. HRMS (ESI+) Calcd. For C<sub>23</sub>H<sub>22</sub>FN<sub>2</sub>O ([M+H]<sup>+</sup>): 361.1711, found: 361.1708. The product was analyzed by HPLC to determine the enantiomeric excess: 99% ee (Chiralpak AS-H, *i*-propanol /hexane = 20/80, flow rate 1.0 mL/min, λ = 254 nm); t<sub>r</sub> = 6.68 and 10.26 min.

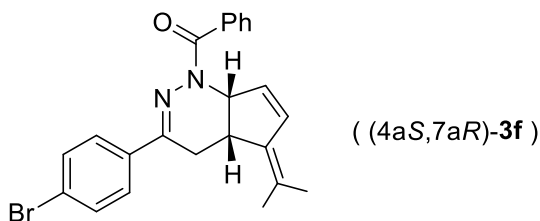

**(4a*S*,7a*R*)-(3-(4-bromophenyl)-5-(propan-2-ylidene)-4,4a,5,7a-tetrahydro-1H-**

**cyclopenta[c]pyridazin-1-yl)(phenyl)methanone (table 2, entry 6):** Yield (73%); white solid; m.p. = 151 °C;  $[\alpha]_D^{20} = -539.2$  (*c* 0.23, CH<sub>2</sub>Cl<sub>2</sub>); <sup>1</sup>H NMR (400 MHz, CDCl<sub>3</sub>) δ 7.72 – 7.70 (m, 2H), 7.46 – 7.38 (m, 7H), 6.51 – 6.49 (m, 1H), 6.19 (d, *J* = 5.2 Hz, 1H), 5.51 (d, *J* = 7.6 Hz, 1H), 3.23 – 3.18 (m, 1H), 2.88 – 2.83 (m, 1H), 2.24 – 2.18 (m, 1H), 1.86 (s, 3H), 1.82 (s, 3H). <sup>13</sup>C NMR (101 MHz, CDCl<sub>3</sub>) δ 171.7, 149.3, 140.5, 135.5, 135.4, 134.0, 131.62, 131.58, 130.4, 129.9, 127.4, 127.1, 124.1, 123.6, 58.5, 35.6, 25.7, 21.2, 20.8. HRMS (ESI+) Calcd. For C<sub>23</sub>H<sub>22</sub>BrN<sub>2</sub>O ([M+H]<sup>+</sup>): 421.0910, found: 421.0910. The product was analyzed by HPLC to determine the enantiomeric excess: 97% ee (Chiralpak AS-H, *i*-propanol /hexane = 20/80, flow rate 1.0 mL/min, λ = 254 nm); t<sub>r</sub> = 6.65 and 9.20 min

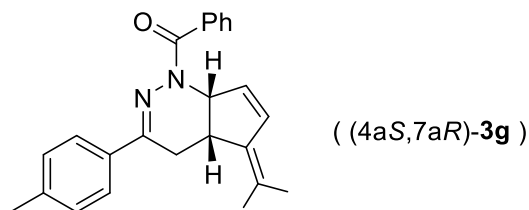

**(4a*S*,7a*R*)-phenyl(5-(propan-2-ylidene)-3-(p-tolyl)-4,4a,5,7a-tetrahydro-1H-cyclopenta[c]pyridazin-1-yl)methanone (table 2, entry 7):** Yield (80%); white solid; m.p. = 137 °C;  $[\alpha]_D^{20} = -687.9$  (*c* 0.23, CH<sub>2</sub>Cl<sub>2</sub>); <sup>1</sup>H NMR (400 MHz, CDCl<sub>3</sub>) δ 7.75 – 7.72 (m, 2H), 7.48 – 7.38 (m, 5H), 7.13 (m, 2H), 6.51 – 6.49 (m, 1H), 6.19 (d, *J* = 5.2 Hz, 1H), 5.54 (d, *J* = 7.6 Hz, 1H), 3.27 – 3.21 (m, 1H), 2.90 – 2.85 (m, 1H), 2.34 (s, 3H), 2.30 – 2.24 (m, 1H), 1.86 (s, 3H), 1.82 (s, 3H). <sup>13</sup>C NMR (101 MHz, CDCl<sub>3</sub>) δ 171.6, 151.5, 140.7, 139.5, 135.6, 134.0, 133.8, 131.8, 130.3, 130.0, 129.2, 127.3, 125.6, 123.9, 58.8, 36.2, 26.1, 21.2, 21.1, 20.8. HRMS (ESI+) Calcd. For C<sub>24</sub>H<sub>25</sub>N<sub>2</sub>O ([M+H]<sup>+</sup>): 357.1961, found: 357.1965. The product was analyzed by HPLC to determine the enantiomeric excess: 99% ee (Chiralpak AS-H, *i*-propanol /hexane = 20/80, flow rate 1.0 mL/min, λ = 254 nm); t<sub>r</sub> = 6.77 and 8.52 min.

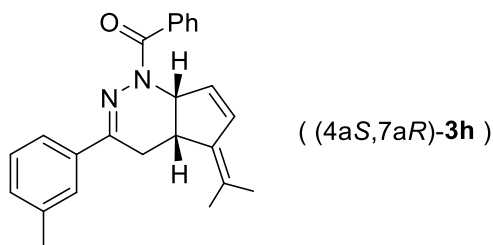

**(4a*S*,7a*R*)-phenyl(5-(propan-2-ylidene)-3-(m-tolyl)-4,4a,5,7a-tetrahydro-1H-cyclopenta[c]pyridazin-1-yl)methanone (table 2, entry 8):** Yield (73%); white solid; m.p. = 90 °C;  $[\alpha]_D^{20} = -236.1$  (*c* 0.23, CH<sub>2</sub>Cl<sub>2</sub>); <sup>1</sup>H NMR (400 MHz, CDCl<sub>3</sub>) δ 7.76 – 7.74 (m, 2H), 7.45 – 7.36 (m, 5H), 7.21 – 7.15 (m, 2H), 6.51 – 6.49 (m, 1H), 6.19 (d, *J* = 5.2 Hz, 1H), 5.54 (d, *J* = 7.6 Hz, 1H), 3.26 – 3.20 (m, 1H), 2.91 – 2.85 (m, 1H), 2.31 (s, 3H), 2.30 – 2.23 (m, 1H), 1.86 (s, 3H), 1.82 (s, 3H). <sup>13</sup>C NMR (101 MHz, CDCl<sub>3</sub>) δ 171.6, 151.3, 140.6, 138.0, 136.5, 135.5, 134.0, 131.7, 130.3, 130.05, 135.00, 128.3, 127.2, 126.3, 123.9, 122.8, 58.7, 36.1, 26.1, 21.4, 21.1, 20.8. HRMS (ESI+) Calcd. For C<sub>24</sub>H<sub>25</sub>N<sub>2</sub>O ([M+H]<sup>+</sup>): 357.1961, found: 357.1960. The product was analyzed by HPLC to determine the enantiomeric excess: 98% ee (Chiralpak AS-H, *i*-propanol /hexane = 20/80, flow rate 1.0 mL/min, λ = 254 nm); t<sub>r</sub> = 5.95 and 7.86 min.

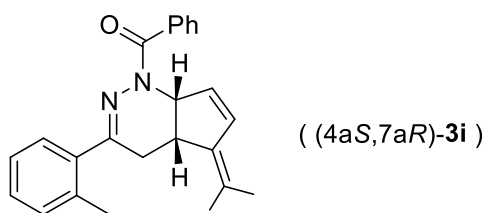

**(4a*S*,7a*R*)-phenyl(5-(propan-2-ylidene)-3-(o-tolyl)-4,4a,5,7a-tetrahydro-1H-**

**cyclopenta[*c*]pyridazin-1-yl)methanone (table 2, entry 9):** Yield (75%); white solid; m.p. = 128 °C;  $[\alpha]_D^{20} = -552.0$  (*c* 0.23, CH<sub>2</sub>Cl<sub>2</sub>); <sup>1</sup>H NMR (400 MHz, CDCl<sub>3</sub>) δ 7.66 – 7.64 (m, 2H), 7.39 – 7.34 (m, 3H), 7.20 – 7.13 (m, 4H), 6.55 – 6.54 (m, 1H), 6.17 (d, *J* = 5.2 Hz, 1H), 5.61 (d, *J* = 7.6 Hz, 1H), 3.39 – 3.34 (m, 1H), 2.72 – 2.66 (m, 1H), 2.37 – 2.31 (m, 1H), 2.18 (s, 3H), 1.81 (s, 3H), 1.79 (s, 3H). <sup>13</sup>C NMR (101 MHz, CDCl<sub>3</sub>) δ 172.4, 157.0, 140.5, 137.5, 135.9, 135.8, 133.8, 132.3, 130.9, 130.1, 129.4, 128.5, 128.0, 127.4, 125.7, 124.1, 59.0, 37.6, 30.5, 21.0, 20.8, 20.7. HRMS (ESI+) Calcd. For C<sub>24</sub>H<sub>25</sub>N<sub>2</sub>O ([M+H]<sup>+</sup>): 357.1961, found: 357.1951. The product was analyzed by HPLC to determine the enantiomeric excess: 93% ee (Chiralpak AS-H, *i*-propanol /hexane = 20/80, flow rate 1.0 mL/min, λ = 254 nm); t<sub>r</sub> = 6.98 and 17.65 min.

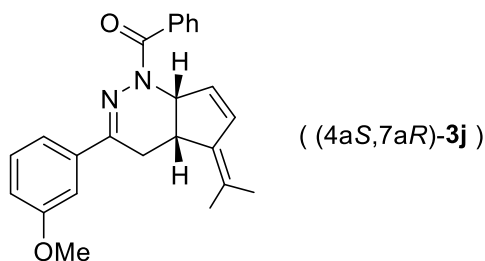

**(4a*S*,7a*R*)-(3-(3-methoxyphenyl)-5-(propan-2-ylidene)-4,4a,5,7a-tetrahydro-1H-**

**cyclopenta[*c*]pyridazin-1-yl)(phenyl)methanone (table 2, entry 10):** Yield (82%); white solid; m.p. = 138 °C;  $[\alpha]_D^{20} = -660.0$  (*c* 0.23, CH<sub>2</sub>Cl<sub>2</sub>); <sup>1</sup>H NMR (400 MHz, CDCl<sub>3</sub>) δ 7.76 – 7.73 (m, 2H), 7.44 – 7.39 (m, 3H), 7.23 – 7.21 (m, 1H), 7.15 – 7.13 (m, 2H), 6.89 – 6.88 (m, 1H), 6.51 – 6.49 (m, 1H), 6.20 (d, *J* = 5.2 Hz, 1H), 5.51 (d, *J* = 7.2 Hz, 1H), 3.68 (s, 3H), 3.23 – 3.17 (m, 1H), 2.92 – 2.86 (m, 1H), 2.24 – 2.18 (m, 1H), 1.86 (s, 3H), 1.82 (s, 3H). <sup>13</sup>C NMR (101 MHz, CDCl<sub>3</sub>) δ 171.7, 159.6, 150.1, 140.5, 137.9, 135.7, 134.0, 131.6, 130.1, 129.8, 129.3, 127.2, 124.0, 118.0, 115.8, 109.9, 58.5, 55.0, 35.7, 25.8, 21.1, 20.8. HRMS (ESI+) Calcd. For C<sub>24</sub>H<sub>25</sub>N<sub>2</sub>O<sub>2</sub> ([M+H]<sup>+</sup>): 373.1911, found: 373.1905. The product was analyzed by HPLC to determine the enantiomeric excess: 97% ee

(Chiralpak AS-H, *i*-propanol /hexane = 20/80, flow rate 1.0 mL/min,  $\lambda$  = 254 nm);  $t_r$  = 7.64 and 10.34 min.

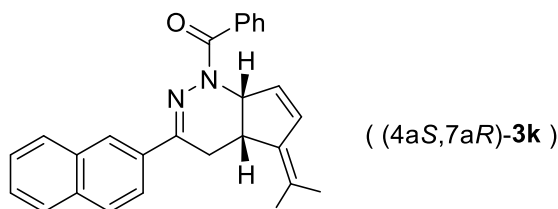

**(4aS,7aR)-(3-(naphthalen-2-yl)-5-(propan-2-ylidene)-4,4a,5,7a-tetrahydro-1H-cyclopenta[c]pyridazin-1-yl)(phenyl)methanone (table 2, entry 11):** Yield (59%); white solid; m.p. = 130 °C;  $[\alpha]_D^{20}$  = -618.6 (*c* 0.23, CH<sub>2</sub>Cl<sub>2</sub>); <sup>1</sup>H NMR (400 MHz, CDCl<sub>3</sub>)  $\delta$  7.95 (s, 1H), 7.79 – 7.70 (m, 6H), 7.46 – 7.41 (m, 5H), 6.50 – 6.48 (m, 1H), 6.22 (d, *J* = 5.2 Hz, 1H), 5.53 (d, *J* = 7.2 Hz, 1H), 3.22 – 3.17 (m, 1H), 3.04 – 2.98 (m, 1H), 2.34 – 2.28 (m, 1H), 1.88 (s, 3H), 1.81 (s, 3H). <sup>13</sup>C NMR (101 MHz, CDCl<sub>3</sub>)  $\delta$  171.7, 150.3, 140.6, 134.1, 134.0, 131.6, 130.3, 130.0, 128.4, 128.1, 127.6, 127.3, 126.7, 126.3, 125.3, 124.0, 123.0, 58.7, 35.8, 25.7, 21.1, 20.8. HRMS (ESI+) Calcd. For C<sub>27</sub>H<sub>25</sub>N<sub>2</sub>O ([M+H]<sup>+</sup>): 393.1961, found: 393.1954. The product was analyzed by HPLC to determine the enantiomeric excess: 98% ee (Chiralpak AS-H, *i*-propanol /hexane = 20/80, flow rate 1.0 mL/min,  $\lambda$  = 254 nm);  $t_r$  = 6.69 and 9.73 min.

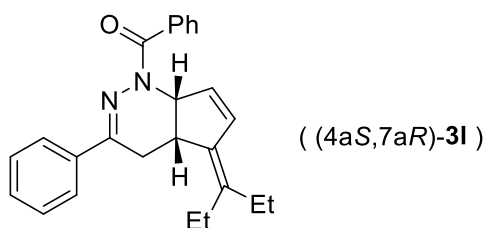

**(4aS,7aR)-(5-(pentan-3-ylidene)-3-phenyl-4,4a,5,7a-tetrahydro-1H-cyclopenta[c]pyridazin-1-yl)(phenyl)methanone:** Yield (95%); white solid; m.p. = 90 °C;  $[\alpha]_D^{20}$  = -561.8 (*c* 0.23, CH<sub>2</sub>Cl<sub>2</sub>); <sup>1</sup>H NMR (400 MHz, CDCl<sub>3</sub>)  $\delta$  7.75 (m, 2H), 7.59 – 7.57 (m, 2H), 7.42 – 7.41 (m, 3H), 7.33 – 7.32 (m, 3H), 6.53 – 6.51 (m, 1H), 6.26 – 6.18 (m, 1H), 5.52 (d, *J* = 7.3 Hz, 1H), 3.24 – 3.18 (m, 1H), 2.92 – 2.87 (m, 1H), 2.27 – 2.20 (m, 5H), 1.12 (t, *J* = 7.5 Hz, 3H), 1.03 (t, *J* = 7.5 Hz, 3H). <sup>13</sup>C NMR (101 MHz, CDCl<sub>3</sub>)  $\delta$  171.7, 150.5, 140.0, 136.6, 136.1, 135.5, 134.6, 131.5, 130.3, 130.0, 129.3, 128.4, 127.3, 125.6, 58.4, 35.3, 26.7, 25.4, 24.4, 13.9, 13.5. HRMS (ESI+) Calcd. For C<sub>25</sub>H<sub>27</sub>N<sub>2</sub>O ([M+H]<sup>+</sup>): 371.2118, found: 371.2116. The product was analyzed by HPLC to determine the enantiomeric excess:



97% ee (Chiralpak IE-H, *i*-propanol /hexane = 4/96, flow rate 1.0 mL/min,  $\lambda$  = 254 nm);  $t_r$  = 7.32 and 8.03 min.

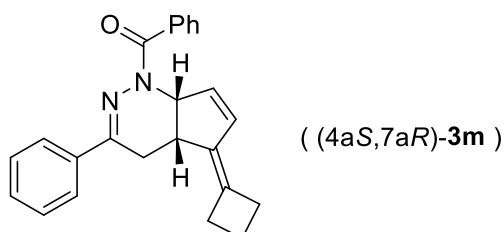

**(4a*S*,7a*R*)-(5-cyclobutylidene-3-phenyl-4,4a,5,7a-tetrahydro-1H-cyclopenta[c]pyridazin-1-yl)(phenyl)methanone:** Yield (87%); white solid; m.p. = 120 °C;  $[\alpha]_D^{20}$  = -650.3 (*c* 0.23, CH<sub>2</sub>Cl<sub>2</sub>); <sup>1</sup>H NMR (400 MHz, CDCl<sub>3</sub>)  $\delta$  7.71 (m, 2H), 7.59 – 7.57 (m, 2H), 7.39 – 7.31 (m, 6H), 6.22 – 6.21 (m, 1H), 6.12 (d, *J* = 5.6 Hz, 1H), 5.60 (d, *J* = 8 Hz, 1H), 3.30 – 3.29 (m, 1H), 2.76 – 2.74 (m, 1H), 2.72 – 2.70 (m, 4H), 2.57 – 2.50 (m, 1H), 2.10 – 2.06 (m, 2H). <sup>13</sup>C NMR (101 MHz, CDCl<sub>3</sub>)  $\delta$  171.4, 153.8, 137.3, 136.3, 135.4, 132.9, 132.6, 131.8, 130.3, 129.8, 129.4, 128.4, 127.2, 125.6, 59.3, 36.5, 30.1, 29.7, 25.7, 17.5. HRMS (ESI+) Calcd. For C<sub>24</sub>H<sub>23</sub>N<sub>2</sub>O ([M+H]<sup>+</sup>): 355.1805, found: 355.1797. The product was analyzed by HPLC to determine the enantiomeric excess: 99% ee (Chiralpak IC-H, *i*-propanol /hexane = 20/80, flow rate 1.0 mL/min,  $\lambda$  = 254 nm);  $t_r$  = 16.71 and 17.38 min.

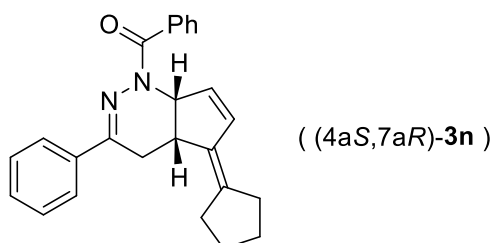

**(4a*S*,7a*R*)-(5-cyclopentylidene-3-phenyl-4,4a,5,7a-tetrahydro-1H-cyclopenta[c]pyridazin-1-yl)(phenyl)methanone:** Yield (73%); white solid; m.p. = 122 °C;  $[\alpha]_D^{20}$  = -289.7 (*c* 0.23, CH<sub>2</sub>Cl<sub>2</sub>); <sup>1</sup>H NMR (400 MHz, CDCl<sub>3</sub>)  $\delta$  7.74 (m, 2H), 7.58 – 7.56 (m, 2H), 7.41 – 7.39 (m, 3H), 7.32 – 7.30 (m, 3H), 6.36 – 6.34 (m, 1H), 6.16 (d, *J* = 5.2 Hz, 1H), 5.56 (d, *J* = 7.6 Hz, 1H), 3.19 – 3.13 (m, 1H), 2.92 – 2.86 (m, 1H), 2.39 – 2.32 (m, 5H), 1.74 – 1.70 (m, 4H). <sup>13</sup>C NMR (101 MHz, CDCl<sub>3</sub>)  $\delta$  171.6, 152.2, 136.8, 136.5, 135.4, 135.3, 133.03, 132.97, 130.3, 129.9, 129.9, 129.3, 128.4, 127.3, 125.6, 59.1, 37.3, 31.0, 30.8, 26.6, 26.4, 25.1. HRMS (ESI+) Calcd. For C<sub>25</sub>H<sub>25</sub>N<sub>2</sub>O ([M+H]<sup>+</sup>): 369.1961, found: 369.1959. The product was analyzed by HPLC to determine the enantiomeric excess: 98% ee (Chiralpak IC-H, *i*-propanol /hexane = 20/80, flow rate 1.0 mL/min,  $\lambda$  = 254 nm);  $t_r$  = 16.83 and 18.44

min.

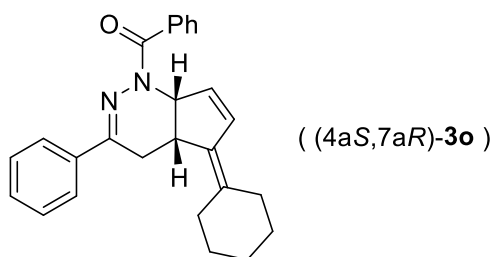

**(4aS,7aR)-(5-cyclohexylidene-3-phenyl-4,4a,5,7a-tetrahydro-1H-cyclopenta[c]pyridazin-1-yl)(phenyl)methanone:** Yield (92%); white solid; m.p. = 110 °C;  $[\alpha]_D^{20} = -596.4$  (*c* 0.23, CH<sub>2</sub>Cl<sub>2</sub>); <sup>1</sup>H NMR (400 MHz, CDCl<sub>3</sub>) δ 7.76 – 7.74 (m, 2H), 7.57 – 7.56 (m, 2H), 7.41 – 7.39 (m, 3H), 7.32 – 7.30 (m, 3H), 6.54 – 6.52 (m, 1H), 6.20 (d, *J* = 5.2 Hz, 1H), 5.55 – 5.52 (m, 1H), 3.28 – 3.22 (m, 1H), 2.82 – 2.81 (m, 1H), 2.30 – 2.25 (m, 5H), 1.61 (d, *J* = 14.8 Hz, 6H). <sup>13</sup>C NMR (101 MHz, CDCl<sub>3</sub>) δ 171.6, 151.0, 137.7, 136.4, 135.4, 134.1, 132.5, 131.1, 130.2, 129.9, 129.2, 128.3, 127.2, 125.5, 58.5, 35.3, 31.8, 31.3, 28.1, 27.9, 26.7, 26.5. HRMS (ESI+) Calcd. For C<sub>26</sub>H<sub>27</sub>N<sub>2</sub>O ([M+H]<sup>+</sup>): 383.2118, found: 383.2115. The product was analyzed by HPLC to determine the enantiomeric excess: 98% ee (Chiralpak IC-H, *i*-propanol /hexane = 20/80, flow rate 1.0 mL/min, λ = 254 nm); *t<sub>r</sub>* = 16.52 and 18.15 min.

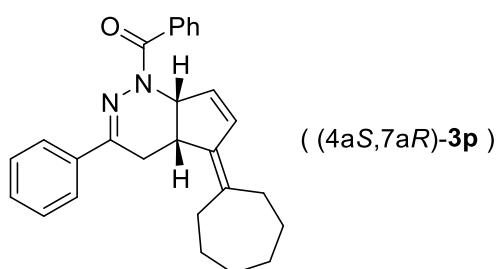

**(4aS,7aR)-(5-cycloheptylidene-3-phenyl-4,4a,5,7a-tetrahydro-1H-cyclopenta[c]pyridazin-1-yl)(phenyl)methanone:** Yield (89%); white solid; m.p. = 125 °C;  $[\alpha]_D^{20} = -582.3$  (*c* 0.23, CH<sub>2</sub>Cl<sub>2</sub>); <sup>1</sup>H NMR (400 MHz, CDCl<sub>3</sub>) δ 7.76 – 7.74 (m, 2H), 7.59 – 7.57 (m, 2H), 7.42 – 7.41 (m, 3H), 7.33 – 7.32 (m, 3H), 6.53 (dd, *J* = 6.0, 2.4 Hz, 1H), 6.23 – 6.22 (m, 1H), 5.51 (d, *J* = 7.6 Hz, 1H), 3.23 – 3.17 (m, 1H), 2.92 (dd, *J* = 16.0, 6.0 Hz, 1H), 2.42 – 2.40 (m, 4H), 2.23 (dd, *J* = 16.0, 9.2 Hz, 1H), 1.72 – 1.64 (m, 3H), 1.57 – 1.55 (m, 5H). <sup>13</sup>C NMR (101 MHz, CDCl<sub>3</sub>) δ 171.7, 150.6, 140.5, 136.6, 135.5, 134.1, 133.9, 131.5, 130.3, 129.9, 129.3, 128.4, 127.3, 125.6, 58.5, 35.5, 32.9, 32.1, 29.7, 28.9,

28.1, 27.9, 26.1. HRMS (ESI+) Calcd. For  $C_{27}H_{29}N_2O$  ( $[M+H]^+$ ): 397.2274, found: 397.2265. The product was analyzed by HPLC to determine the enantiomeric excess: 99% ee (Chiralpak IE-H, *i*-propanol /hexane = 20/80, flow rate 1.0 mL/min,  $\lambda$  = 254 nm);  $t_r$  = 13.90 and 14.48 min.

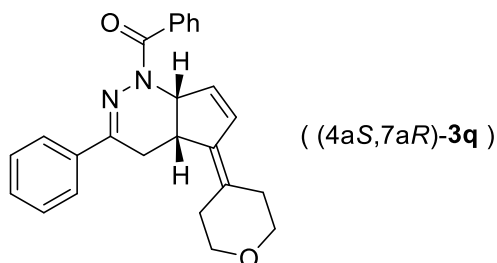

**(4a*S*,7a*R*)-phenyl(3-phenyl-5-(tetrahydro-4H-pyran-4-ylidene)-4,4a,5,7a-tetrahydro-1H-cyclopenta[*c*]pyridazin-1-yl)methanone:** Yield (72%); white solid; m.p. = 118 °C;  $[\alpha]^{30}_D = -293.6$  (*c* 0.23,  $CH_2Cl_2$ );  $^1H$  NMR (400 MHz,  $CDCl_3$ )  $\delta$  7.76 – 7.74 (m, 2H), 7.58 – 7.56 (m, 2H), 7.49 – 7.39 (m, 3H), 7.35 – 7.32 (m, 3H), 6.51 (dd,  $J$  = 5.6, 2.0 Hz, 1H), 6.28 (d,  $J$  = 5.2 Hz, 1H), 5.57 (d,  $J$  = 7.6 Hz, 1H), 3.87 – 3.67 (m, 4H), 3.32 – 3.27 (m, 1H), 2.84 (dd,  $J$  = 16.0, 6.4 Hz, 1H), 2.45 – 2.43 (m, 4H), 2.31 (dd,  $J$  = 16.0, 8.8 Hz, 1H).  $^{13}C$  NMR (101 MHz,  $CDCl_3$ )  $\delta$  171.7, 150.9, 139.7, 136.4, 135.6, 135.4, 130.6, 130.4, 130.0, 129.4, 128.5, 127.4, 126.7, 125.6, 68.9, 68.7, 58.4, 35.4, 32.2, 31.8, 26.7. HRMS (ESI+) Calcd. For  $C_{25}H_{25}N_2O_2$  ( $[M+H]^+$ ): 385.1911, found: 385.1900. The product was analyzed by HPLC to determine the enantiomeric excess: 99% ee (Chiralpak IE-H, *i*-propanol /hexane = 30/70, flow rate 1.0 mL/min,  $\lambda$  = 254 nm);  $t_r$  = 18.86 and 22.82 min.

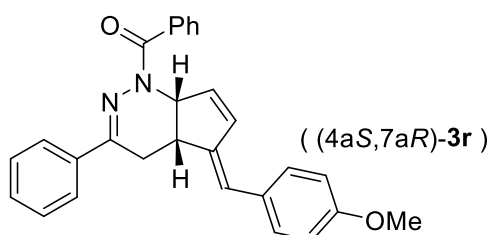

**(4a*S*,7a*R*)-(E)-(5-(4-methoxybenzylidene)-3-phenyl-4,4a,5,7a-tetrahydro-1H-cyclopenta[*c*]pyridazin-1-yl)(phenyl)methanone(*Z/E* = 0.7 : 1):** Yield (79%); white solid; m.p. = 158 °C;  $[\alpha]^{30}_D = -796.4$  (*c* 0.23,  $CH_2Cl_2$ );  $^1H$  NMR (400 MHz,  $CDCl_3$ )  $\delta$  7.74 – 7.60 (m, 5.1H), 7.43 – 7.24 (m, 15.3H), 6.96 – 6.86 (m, 4.1H), 6.48 – 6.26 (m, 4.4H), 5.82 (d,  $J$  = 7.6 Hz, 1H), 5.68 (d,  $J$  = 7.6 Hz, 0.7H), 3.98 (q,  $J$  = 6.4 Hz, 1H), 3.85 (s, 3H), 3.81 (s, 2.1H), 3.46 (q,  $J$  = 6.8 Hz, 0.7H), 2.95 – 2.60 (m, 3.4H).  $^{13}C$  NMR (101 MHz,  $CDCl_3$ )  $\delta$  171.5, 158.47, 158.45, 154.6, 153.4, 146.3, 146.1,

138.9, 138.1, 136.2, 136.1, 135.3, 134.3, 131.9, 130.55, 130.49, 130.1, 130.0, 129.6, 129.5, 129.4, 129.2, 128.5, 128.4, 127.4, 125.8, 121.9, 120.5, 114.2, 113.9, 60.3, 58.5, 55.3, 40.2, 37.2, 28.4, 25.0. HRMS (ESI+) Calcd. For  $C_{28}H_{25}N_2O_2$  ( $[M+H]^+$ ): 421.1911, found: 421.1901. The product was analyzed by HPLC to determine the enantiomeric excess: 99% ee (Chiralpak AS-H, *i*-propanol/hexane = 25/75, flow rate 1.0 mL/min,  $\lambda$  = 254 nm);  $t_r$  = 11.55, 14.16, 17.50, 22.49 min.

### 3 Synthetic Transformations

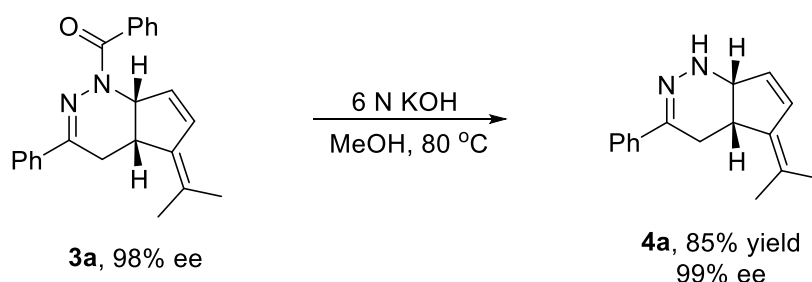

To methanol (10 mL) was added **3a** (0.3 mmol) and KOH (6 mmol), and the reaction mixture was heated to 80 °C until the starting material was consumed (monitored by TLC). Then, the reaction mixture was neutralized by 1 N HCl and extracted by DCM, the combined organic solvent was dried with  $Na_2SO_4$  and was concentrated in vacuum. The residue was purified by column chromatography to give the product, which was then directly analyzed by HPLC to determine the enantiomeric excess.

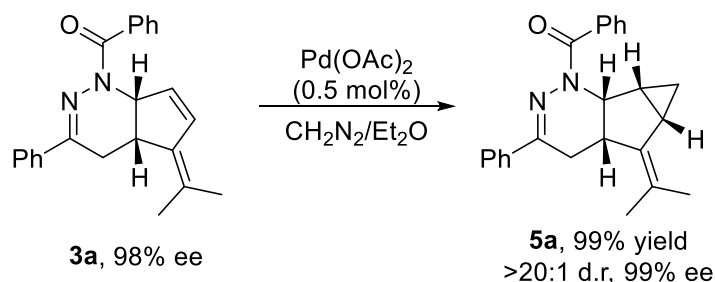

**3a** (0.3 mmol) was added to a dry solution of diazomethane (prepare from 100 mg *N*-methyl-*N*-nitrosourea, 1 mL ethyl ether) at 0 °C. Then catalytic amount of  $Pd(OAc)_2$  was added in one portion and gas evolution was observed. After 1 h vigorous stirring at 0 °C, the organic solvent was concentrated in vacuum. The residue was purified by column chromatography to give the product,

which was then directly analyzed by HPLC to determine the enantiomeric excess.

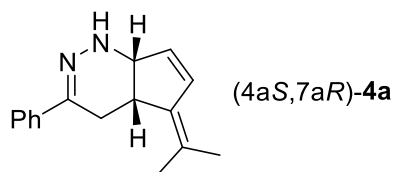

**(4aS,7aR)-3-phenyl-5-(propan-2-ylidene)-4,4a,5,7a-tetrahydro-1H-cyclopenta[c]pyridazine:**

Yield (85%); brown solid; m.p. = 21 °C;  $[\alpha]_D^{30} = -198.0$  (*c* 0.23, CH<sub>2</sub>Cl<sub>2</sub>); <sup>1</sup>H NMR (400 MHz, CDCl<sub>3</sub>)  $\delta$  7.67 – 7.56 (m, 2H), 7.39 – 7.30 (m, 3H), 6.49 (dd, *J* = 5.6, 1.2 Hz, 1H), 5.73 (d, *J* = 4.8 Hz, 1H), 4.46 (d, *J* = 8.4 Hz, 1H), 3.32 – 3.27 (m, 1H), 2.80 (dd, *J* = 14.0, 6.4 Hz, 1H), 2.36 (dd, *J* = 14.0, 6.8 Hz, 1H), 1.84 (s, 3H), 1.78 (s, 3H). <sup>13</sup>C NMR (101 MHz, CDCl<sub>3</sub>)  $\delta$  155.1, 141.5, 137.8, 134.0, 133.4, 128.4, 128.3, 125.1, 123.3, 61.9, 40.3, 27.3, 21.00, 20.9. HRMS (ESI<sup>+</sup>) Calcd. For C<sub>16</sub>H<sub>19</sub>N<sub>2</sub> ([M+H]<sup>+</sup>): 239.1543, found: 239.1543. The product was analyzed by HPLC to determine the enantiomeric excess: 99% ee (Chiralpak AD-H, *i*-propanol /hexane = 20/80, flow rate 1.0 mL/min,  $\lambda$  = 254 nm); *t<sub>r</sub>* = 7.95, 10.37 min.

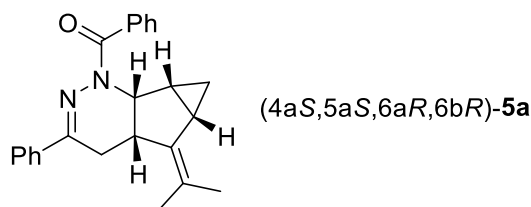

**phenyl((4aS,5aS,6aR,6bR)-3-phenyl-5-(propan-2-ylidene)-4a,5,5a,6,6a,6b-**

**hexahydrocyclopropa[4,5]cyclopenta[1,2-c]pyridazin-1(4H)-yl)methanone:** Yield (99%); white solid; m.p. = 42 °C;  $[\alpha]_D^{30} = -88.0$  (*c* 0.23, CH<sub>2</sub>Cl<sub>2</sub>); <sup>1</sup>H NMR (400 MHz, CDCl<sub>3</sub>)  $\delta$  7.82 – 7.73 (m, 2H), 7.56 – 7.54 (m, 2H), 7.46 – 7.42 (m, 3H), 7.35 – 7.27 (m, 3H), 4.99 (dd, *J* = 9.2, 5.2 Hz, 1H), 3.16 – 2.94 (m, 2H), 2.57 – 2.43 (m, 1H), 2.13 – 2.05 (m, 1H), 2.03 – 1.93 (m, 1H), 1.86 (s, 3H), 1.77 (s, 3H), 0.73 – 0.68 (m, 1H), 0.59 – 0.56 (m, 1H). <sup>13</sup>C NMR (101 MHz, CDCl<sub>3</sub>)  $\delta$  171.8, 145.3, 137.3, 136.9, 135.8, 130.04, 129.96, 129.0, 128.4, 127.3, 125.2, 123.6, 52.5, 30.6, 26.8, 23.7, 21.2, 20.7, 20.3, 11.1. HRMS (ESI<sup>+</sup>) Calcd. For C<sub>24</sub>H<sub>24</sub>N<sub>2</sub>NaO ([M+Na]<sup>+</sup>): 379.1781, found: 379.1781. The product was analyzed by HPLC to determine the enantiomeric excess: 99% ee (Chiralpak AD-H, *i*-propanol /hexane = 10/90, flow rate 1.0 mL/min,  $\lambda$  = 230 nm); *t<sub>r</sub>* = 6.03, 8.92 min.

## 4 References

1. M. C. Tong, X. Chen, J. Li, R. Huang, H. Tao, C. J. Wang, *Angew. Chem. Int. Ed.* **2014**, 53, 4680.
2. S. Collins, Yaping Hong, Mark Kataoka, and Thelam Nguyen, *J. Org. Chem.* **1990**, 55, 3395-3398.

## 5 NMR and HPLC spectra

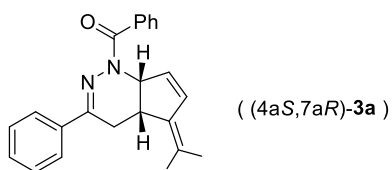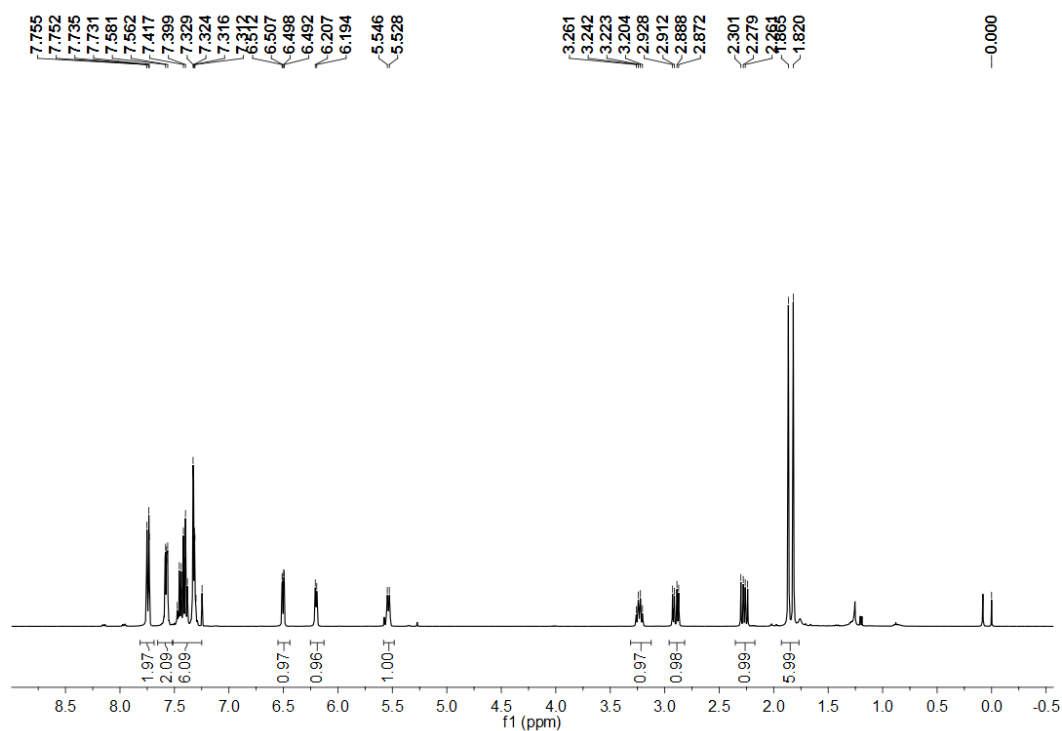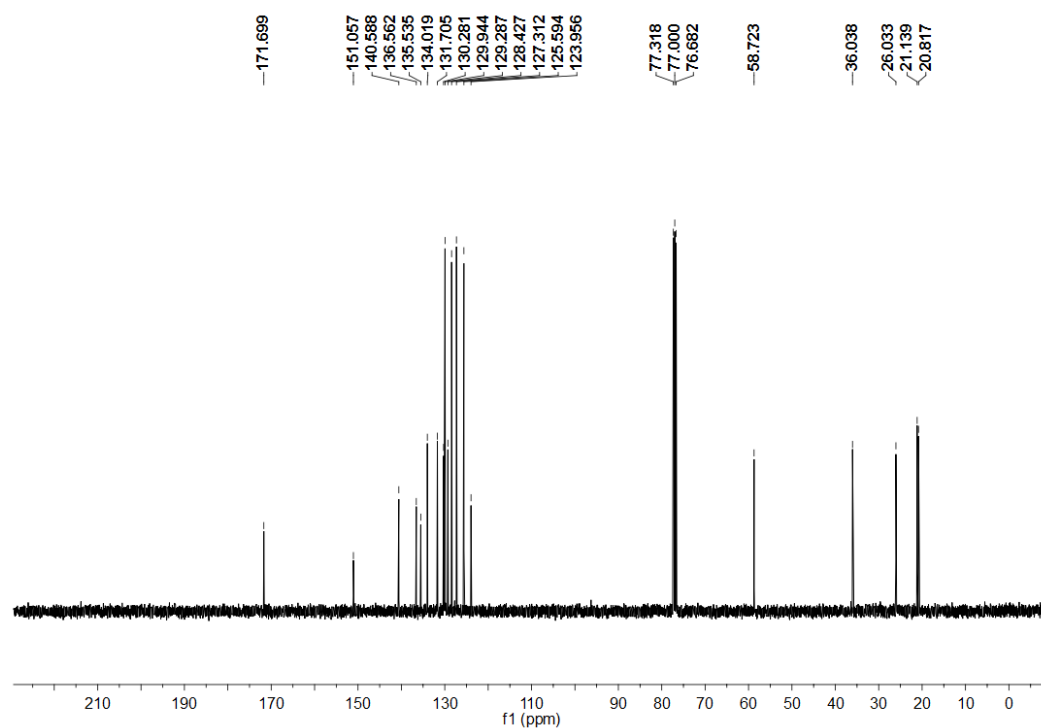

Data File D:\LC\DATA\SZM\SZM-5-45\SZM-5-45-50 2016-05-15 13-38-50\071-0201.D  
Sample Name: SZM-5-45-1

```
=====
Acq. Operator   : WZF                               Seq. Line :    2
Acq. Instrument : Instrument 1                       Location  : Vial 71
Injection Date  : 5/15/2016 2:11:39 PM              Inj       :    1
                                                    Inj Volume: 5 µl
Acq. Method     : D:\LC\DATA\SZM\SZM-5-45\SZM-5-45-50 2016-05-15 13-38-50\ASH-20-80-1ML-
                  254NM-30MIN.M
Last changed    : 5/15/2016 1:36:20 PM by WZF
Analysis Method : D:\LC\DATA\SZM\SZM-5-45\SZM-5-45-50 2016-05-15 13-38-50\071-0201.D\DA.M (
                  ASH-20-80-1ML-254NM-30MIN.M)
Last changed    : 5/15/2016 10:11:19 PM by WZF
                  (modified after loading)
=====
```

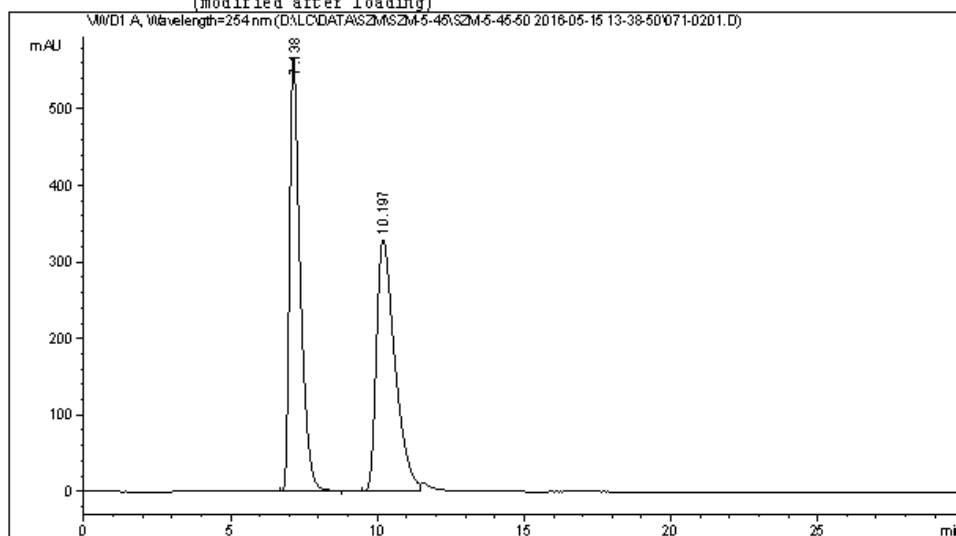

=====  
Area Percent Report  
=====

Sorted By : Signal  
Multiplier : 1.0000  
Dilution : 1.0000  
Use Multiplier & Dilution Factor with ISTDs

Signal 1: VWD1 A, Wavelength=254 nm

| Peak # | RetTime [min] | Type | Width [min] | Area mAU  | Height [mAU] | Area %  |
|--------|---------------|------|-------------|-----------|--------------|---------|
| 1      | 7.138         | VB   | 0.3751      | 1.43769e4 | 565.75854    | 49.9861 |
| 2      | 10.197        | BV   | 0.6560      | 1.43849e4 | 329.74820    | 50.0139 |

Totals : 2.87618e4 895.50674

Instrument 1 5/15/2016 10:11:25 PM WZF

Page 1 of 1



Data File D:\LC\DATA\SZM\SZM-5-45\SZM-5-45-50 2016-05-15 13-38-50\075-0601.D  
Sample Name: SZM-5-50-1

```
=====
Acq. Operator   : WZF                      Seq. Line :    6
Acq. Instrument : Instrument 1              Location  : Vial 75
Injection Date  : 5/15/2016 4:17:54 PM      Inj       :    1
                                           Inj Volume: 5 µl
Acq. Method     : D:\LC\DATA\SZM\SZM-5-45\SZM-5-45-50 2016-05-15 13-38-50\ASH-20-80-IML-
                                           254NM-30MIN.M
Last changed    : 5/15/2016 1:36:20 PM by WZF
Analysis Method : D:\LC\DATA\SZM\SZM-5-45\SZM-5-45-50 2016-05-15 13-38-50\075-0601.D\DA.M (
                                           ASH-20-80-IML-254NM-30MIN.M)
Last changed    : 5/15/2016 10:14:36 PM by WZF
                                           (modified after loading)
=====
```

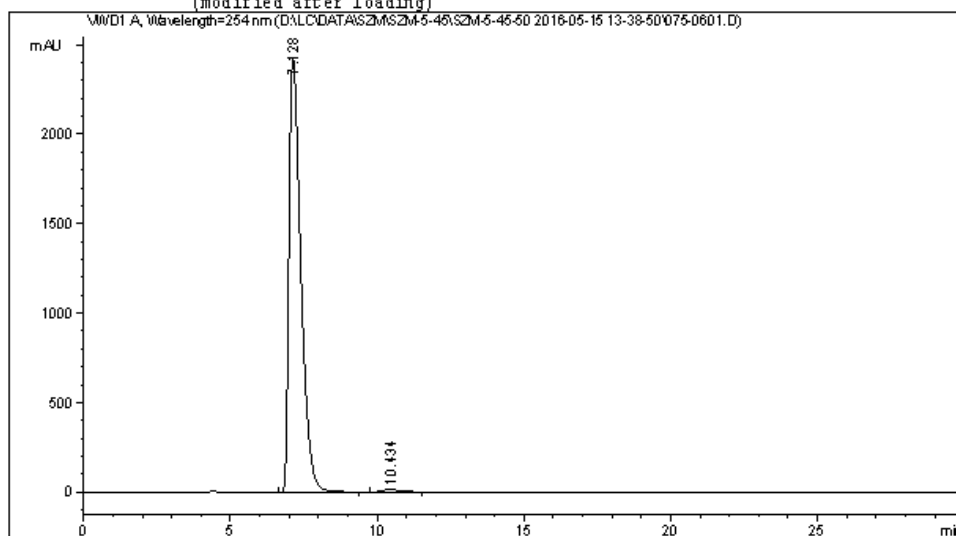

=====  
Area Percent Report  
=====

Sorted By : Signal  
Multiplier : 1.0000  
Dilution : 1.0000  
Use Multiplier & Dilution Factor with ISTDs

Signal 1: VWD1 A, Wavelength=254 nm

| Peak # | RetTime [min] | Type | Width [min] | Area mAU  | Height [mAU] | Area %  |
|--------|---------------|------|-------------|-----------|--------------|---------|
| 1      | 7.128         | BB   | 0.4274      | 6.81754e4 | 2422.35938   | 99.2040 |
| 2      | 10.434        | BV   | 0.6287      | 547.02545 | 12.71287     | 0.7960  |

Totals : 6.87225e4 2435.07224

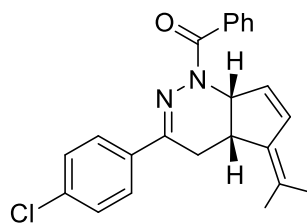

( (4a*S*,7a*R*)-**3b** )

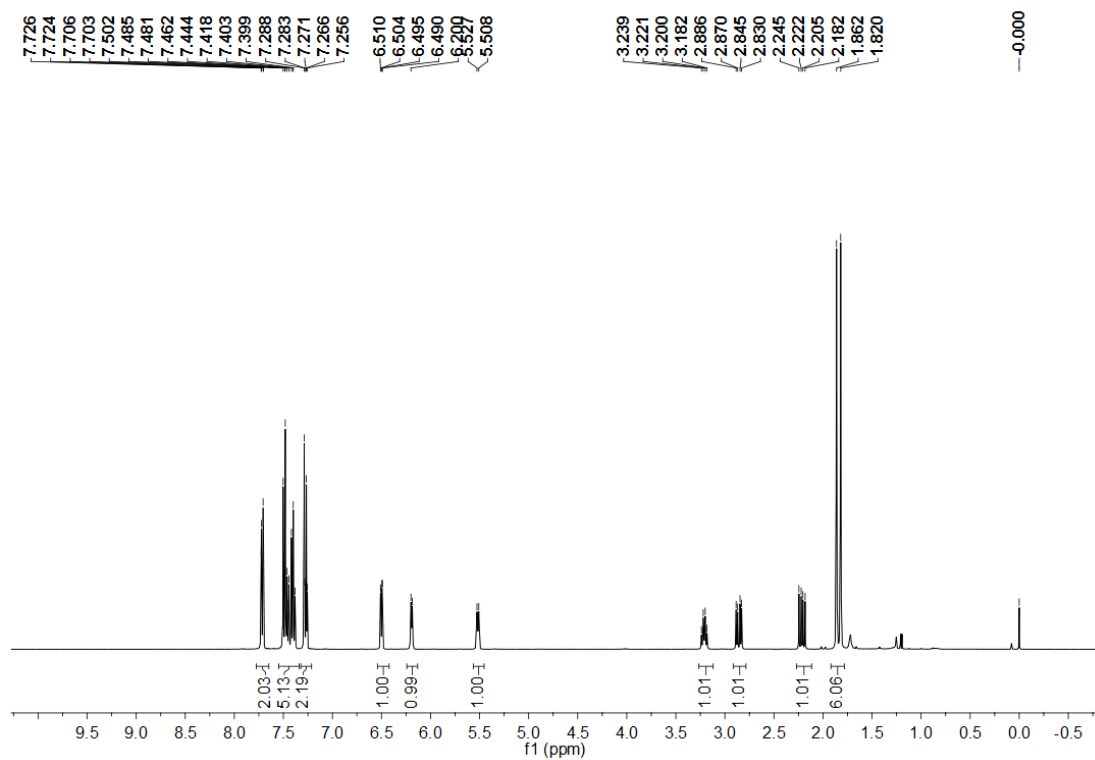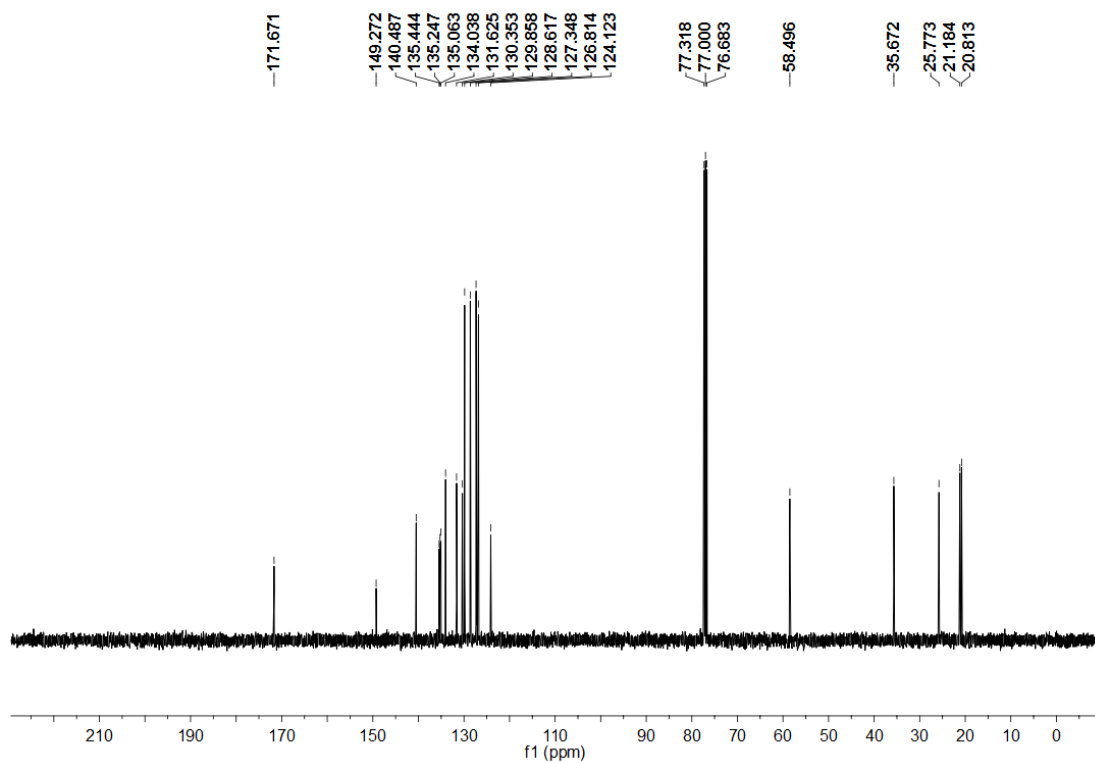

Data File D:\LC\DATA\SZM\SZM-5-45\SZM-5-45-C 2016-03-30 23-02-22\081-0101.D  
Sample Name: SZM-5-45-C

```
=====
Acq. Operator   : LHC                      Seq. Line :    1
Acq. Instrument : Instrument 1              Location  : Vial 81
Injection Date  : 3/30/2016 11:03:33 PM    Inj       :    1
                                           Inj Volume: 5 µl
Acq. Method     : D:\LC\DATA\SZM\SZM-5-45\SZM-5-45-C 2016-03-30 23-02-22\ASH-20-80-1ML-
254NM-20MIN.M
Last changed    : 3/28/2016 11:02:44 AM by LHC
Analysis Method : D:\LC\DATA\SZM\SZM-5-45\SZM-5-45-C 2016-03-30 23-02-22\081-0101.D\DA.M (
ASH-20-80-1ML-254NM-20MIN.M)
Last changed    : 5/14/2016 10:02:46 PM by WZF
(modified after loading)
=====
```

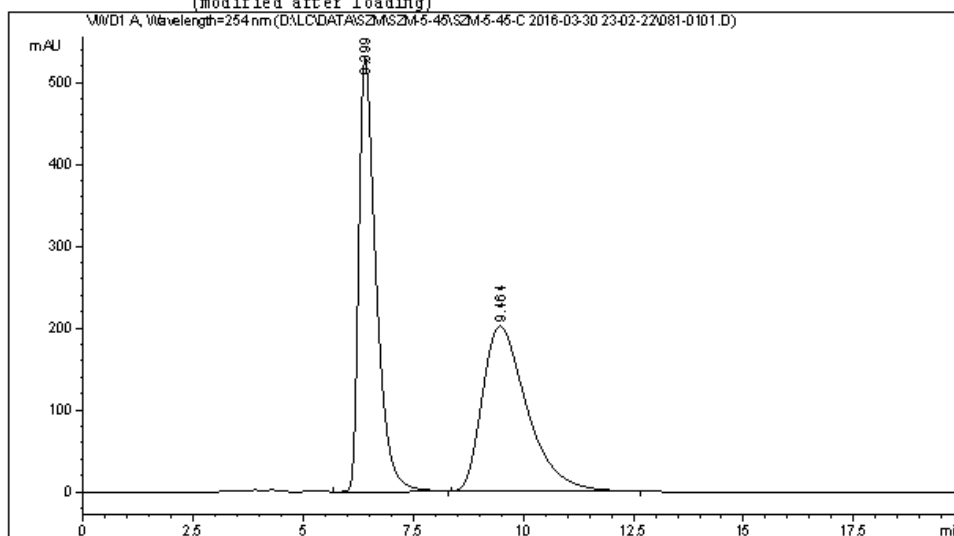

# Area Percent Report

```
Sorted By      :      Signal
Multiplier     :      1.0000
Dilution       :      1.0000
Use Multiplier & Dilution Factor with ISTDs
```

Signal 1: VMD1 A, Wavelength=254 nm

| Peak # | RetTime [min] | Type | Width [min] | Area mAU *s | Height [mAU] | Area %  |
|--------|---------------|------|-------------|-------------|--------------|---------|
| 1      | 6.399         | VB   | 0.4084      | 1.44988e4   | 529.30829    | 50.2465 |
| 2      | 9.464         | BB   | 1.0937      | 1.43565e4   | 202.11499    | 49.7535 |

Totals :                   2.88552e4   731.42328

Instrument 1 5/14/2016 10:02:51 PM WZF

Page 1 of 1

Data File D:\LC\DATA\SZM\SZM-5-50\SZM-5-50-4 2016-03-28 11-30-54\082-0101.D  
Sample Name: SZM-5-50-4

```
=====
Acq. Operator   : LHC                      Seq. Line :    1
Acq. Instrument : Instrument 1              Location  : Vial 82
Injection Date  : 3/28/2016 11:32:15 AM     Inj       :    1
                                           Inj Volume: 5 µl
Acq. Method     : D:\LC\DATA\SZM\SZM-5-50\SZM-5-50-4 2016-03-28 11-30-54\ASH-20-80-1ML-
254NM-20MIN.M
Last changed    : 3/28/2016 11:02:44 AM by LHC
Analysis Method : D:\LC\DATA\SZM\SZM-5-50\SZM-5-50-4 2016-03-28 11-30-54\082-0101.D\DA.M (
ASH-20-80-1ML-254NM-20MIN.M)
Last changed    : 5/14/2016 10:26:44 PM by WZF
(modified after loading)
=====
```

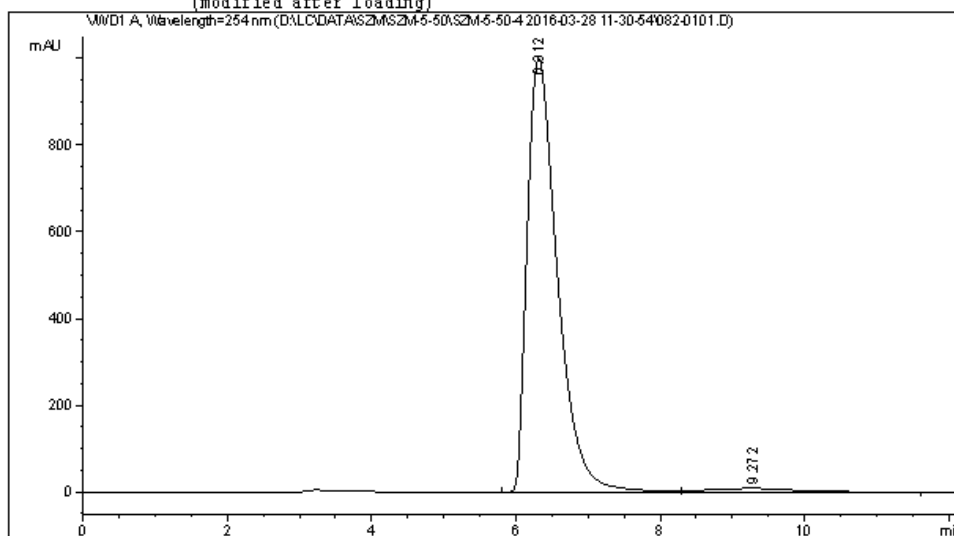

# Area Percent Report

```
Sorted By      : Signal
Multiplier     : 1.0000
Dilution       : 1.0000
Use Multiplier & Dilution Factor with ISTDs
```

Signal 1: VMD1 A, Wavelength=254 nm

| Peak # | RetTime [min] | Type | Width [min] | Area mAU *s | Height [mAU] | Area %  |
|--------|---------------|------|-------------|-------------|--------------|---------|
| 1      | 6.312         | BV   | 0.4461      | 2.90942e4   | 998.96808    | 97.7392 |
| 2      | 9.272         | VB   | 0.9512      | 672.98792   | 8.50165      | 2.2608  |

Totals : 2.97671e4 1007.46973

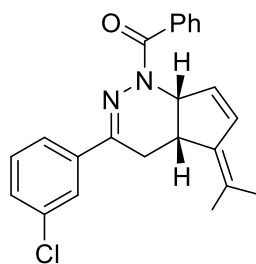

( (4a*S*,7a*R*)-**3c** )

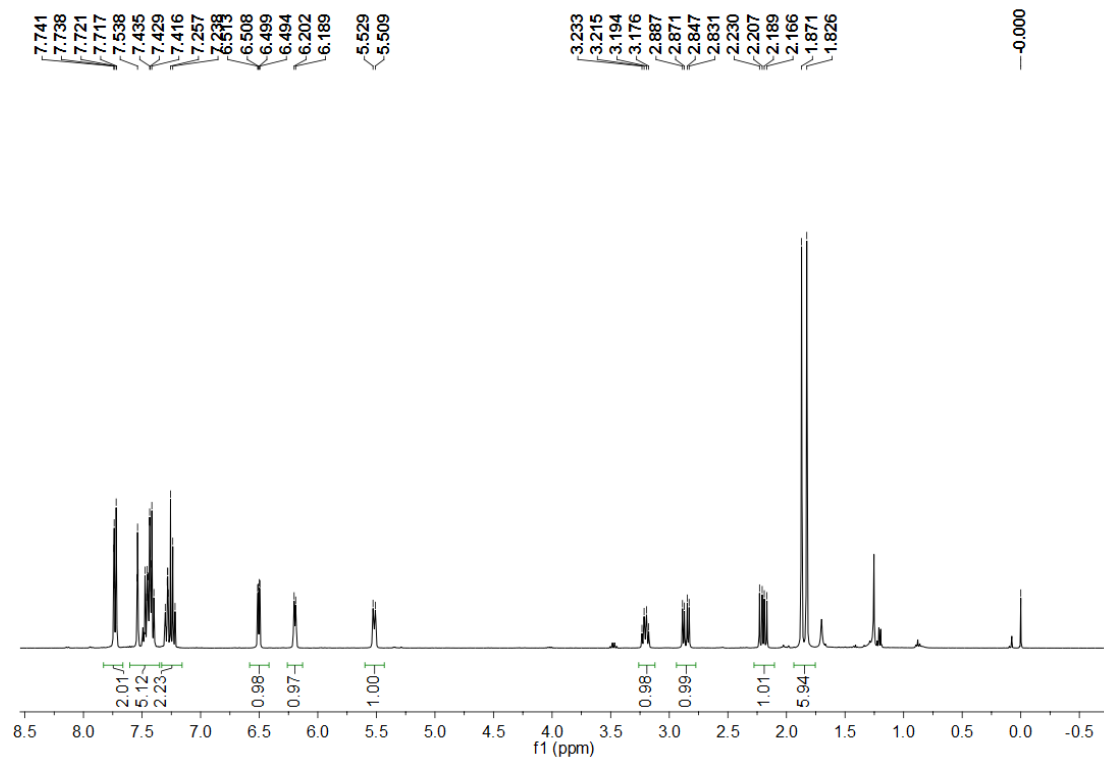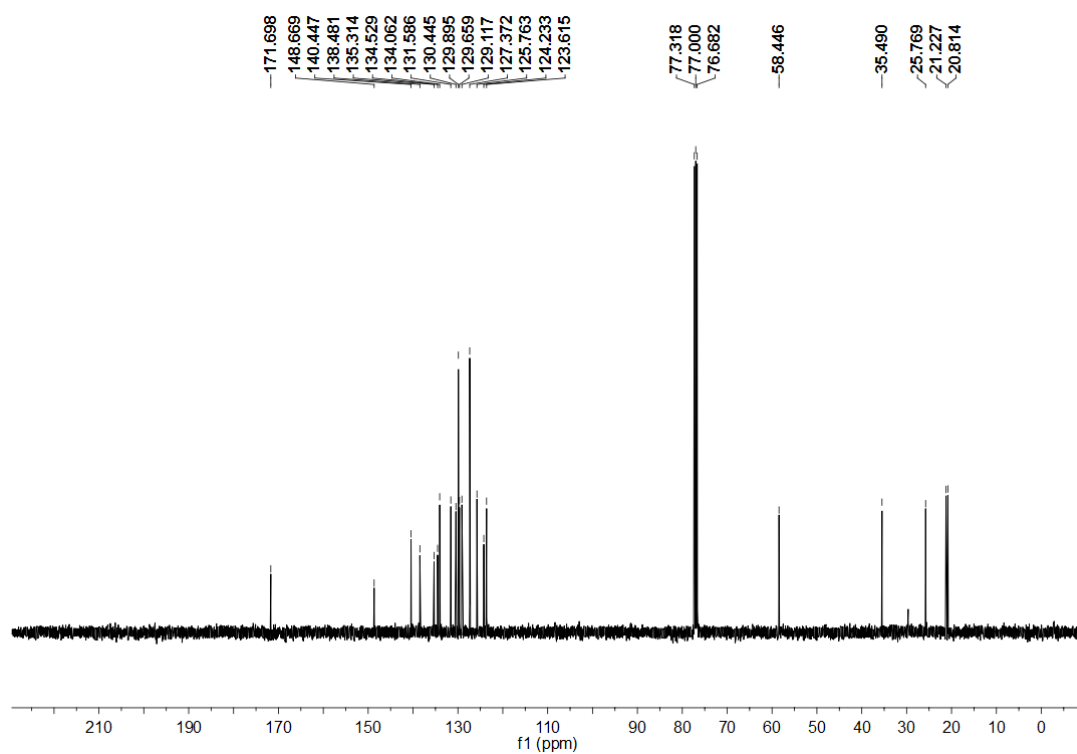

Data File D:\LC\DATA\SZM\SZM-5-45\SZM-5-45-50 2016-05-15 13-38-50\073-0401.D  
Sample Name: SZM-5-45-B

```
=====
Acq. Operator   : WZF                               Seq. Line :    4
Acq. Instrument : Instrument 1                       Location  : Vial 73
Injection Date  : 5/15/2016 3:14:36 PM              Inj       :    1
                                                    Inj Volume: 5 µl
Acq. Method     : D:\LC\DATA\SZM\SZM-5-45\SZM-5-45-50 2016-05-15 13-38-50\ASH-20-80-IML-
                  254NM-30MIN.M
Last changed    : 5/15/2016 1:36:20 PM by WZF
Analysis Method : D:\LC\DATA\SZM\SZM-5-45\SZM-5-45-50 2016-05-15 13-38-50\073-0401.D\DA.M (
                  ASH-20-80-IML-254NM-30MIN.M)
Last changed    : 5/15/2016 10:12:55 PM by WZF
                  (modified after loading)
=====
```

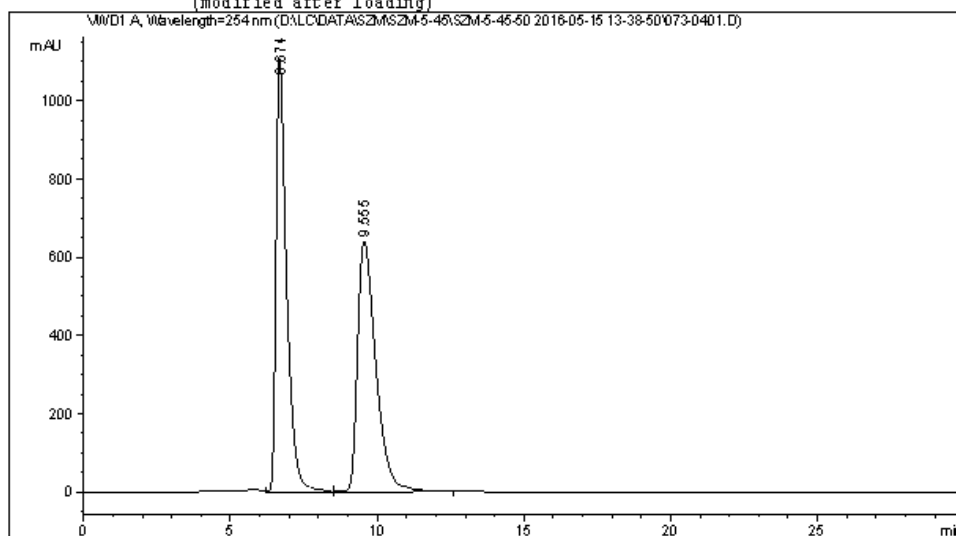

# Area Percent Report

```
=====
Sorted By      : Signal
Multiplier     : 1.0000
Dilution       : 1.0000
Use Multiplier & Dilution Factor with ISTDs
=====
```

Signal 1: VWD1 A, Wavelength=254 nm

| Peak # | RetTime [min] | Type | Width [min] | Area mAU *s | Height [mAU] | Area %  |
|--------|---------------|------|-------------|-------------|--------------|---------|
| 1      | 6.674         | W    | 0.3680      | 2.77251e4   | 1106.75330   | 49.8976 |
| 2      | 9.555         | VB   | 0.6630      | 2.78388e4   | 640.27997    | 50.1024 |

Totals : 5.55638e4 1747.03326

Instrument 1 5/15/2016 10:13:00 PM WZF

Page 1 of 1

Data File D:\LC\DATA\SZM\SZM-5-50\SZM-5-50-3 2016-03-28 11-05-02\081-0101.D  
Sample Name: SZM-5-50-3

```
=====
Acq. Operator   : LHC                      Seq. Line :    1
Acq. Instrument : Instrument 1              Location  : Vial 81
Injection Date  : 3/28/2016 11:06:37 AM    Inj       :    1
                                           Inj Volume: 5 µl
Acq. Method     : D:\LC\DATA\SZM\SZM-5-50\SZM-5-50-3 2016-03-28 11-05-02\ASH-20-80-1ML-
254NM-20MIN.M
Last changed    : 3/28/2016 11:02:44 AM by LHC
Analysis Method : D:\LC\DATA\SZM\SZM-5-50\SZM-5-50-3 2016-03-28 11-05-02\081-0101.D\DA.M (
ASH-20-80-1ML-254NM-20MIN.M)
Last changed    : 5/14/2016 10:21:19 PM by WZF
(modified after loading)
=====
```

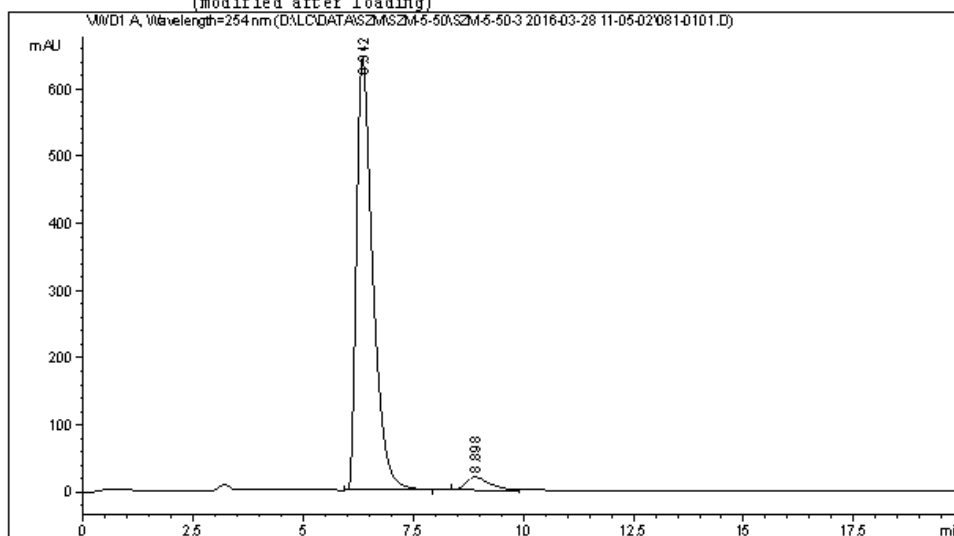

# Area Percent Report

```
Sorted By      : Signal
Multiplier     : 1.0000
Dilution       : 1.0000
Use Multiplier & Dilution Factor with ISTDs
```

Signal 1: VMD1 A, Wavelength=254 nm

| Peak # | RetTime [min] | Type | Width [min] | Area mAU *s | Height [mAU] | Area %  |
|--------|---------------|------|-------------|-------------|--------------|---------|
| 1      | 6.342         | BB   | 0.3871      | 1.65897e4   | 642.55939    | 95.7155 |
| 2      | 8.898         | WV   | 0.5656      | 742.60004   | 19.22858     | 4.2845  |

Totals : 1.73323e4 661.78797

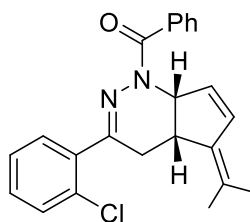

( (4a*S*,7a*R*)-**3d** )

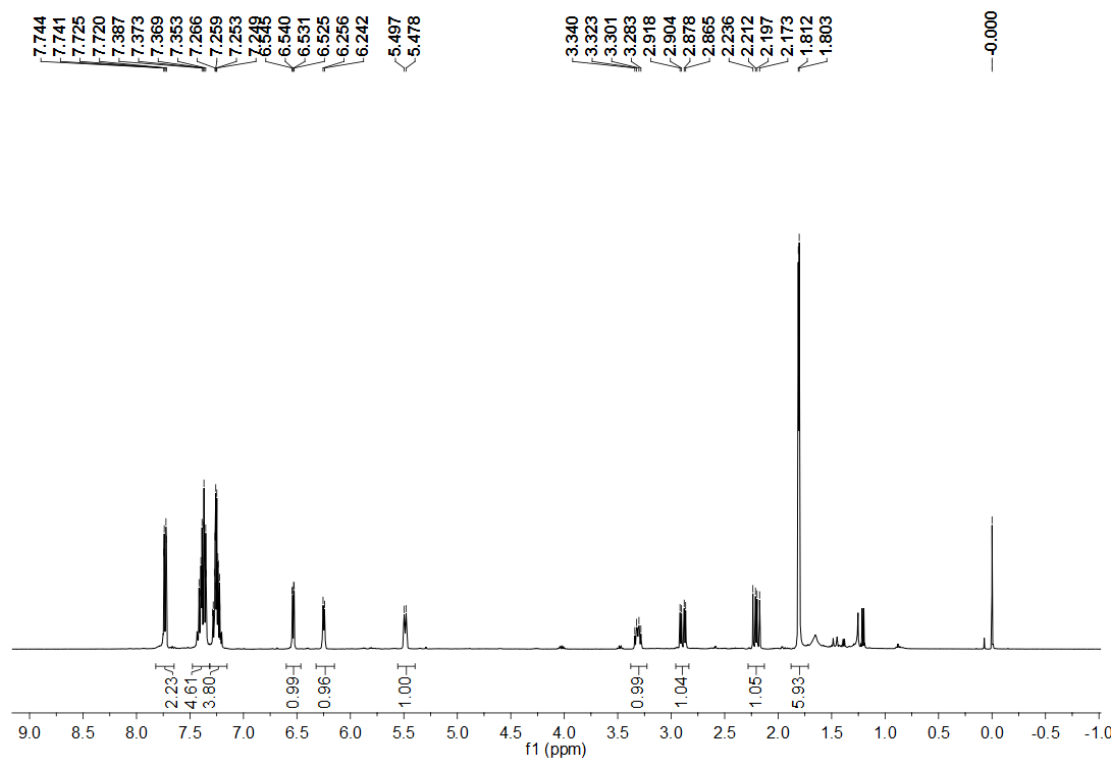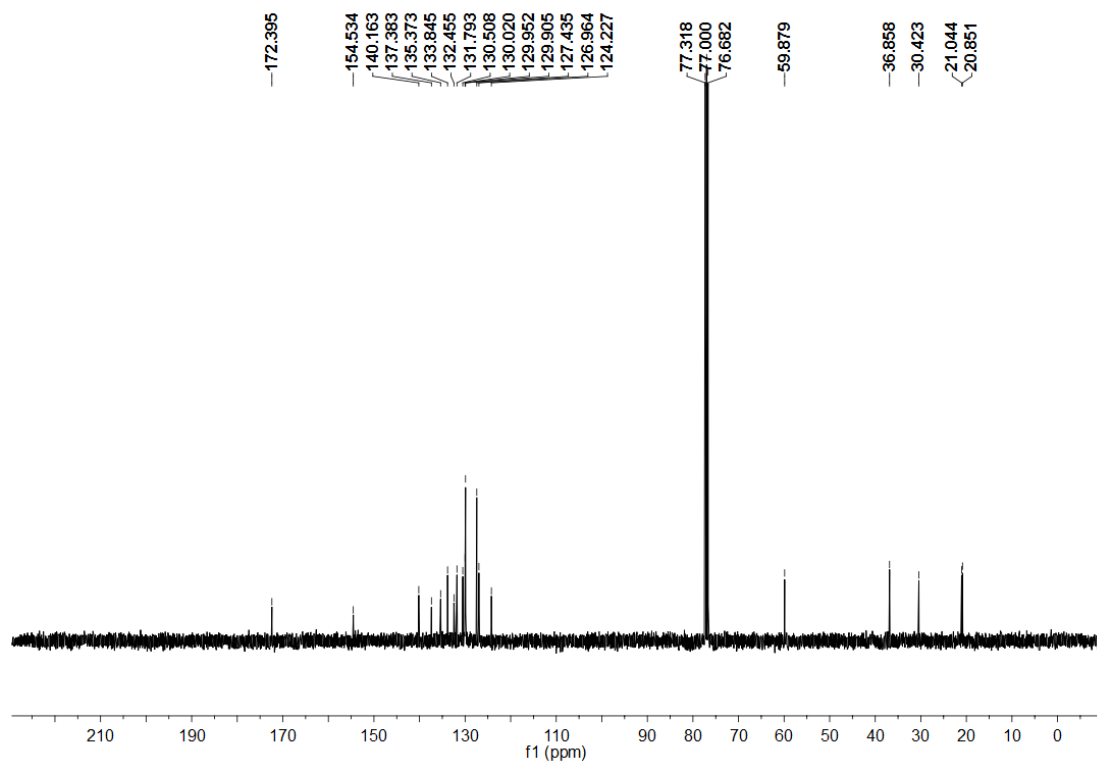



Data File D:\LC\DATA\SZM\SZM-5-45\SZM-5-45-50 2016-05-15 13-38-50\072-0301.D  
Sample Name: SZM-5-45-A

```
=====
Acq. Operator   : WZF                               Seq. Line :    3
Acq. Instrument : Instrument 1                       Location  : Vial 72
Injection Date  : 5/15/2016 2:43:05 PM              Inj       :    1
                                                    Inj Volume: 5 µl
Acq. Method     : D:\LC\DATA\SZM\SZM-5-45\SZM-5-45-50 2016-05-15 13-38-50\ASH-20-80-IML-
                  254NM-30MIN.M
Last changed    : 5/15/2016 1:36:20 PM by WZF
Analysis Method : D:\LC\DATA\SZM\SZM-5-45\SZM-5-45-50 2016-05-15 13-38-50\072-0301.D\DA.M (
                  ASH-20-80-IML-254NM-30MIN.M)
Last changed    : 5/15/2016 10:12:19 PM by WZF
                  (modified after loading)
=====
```

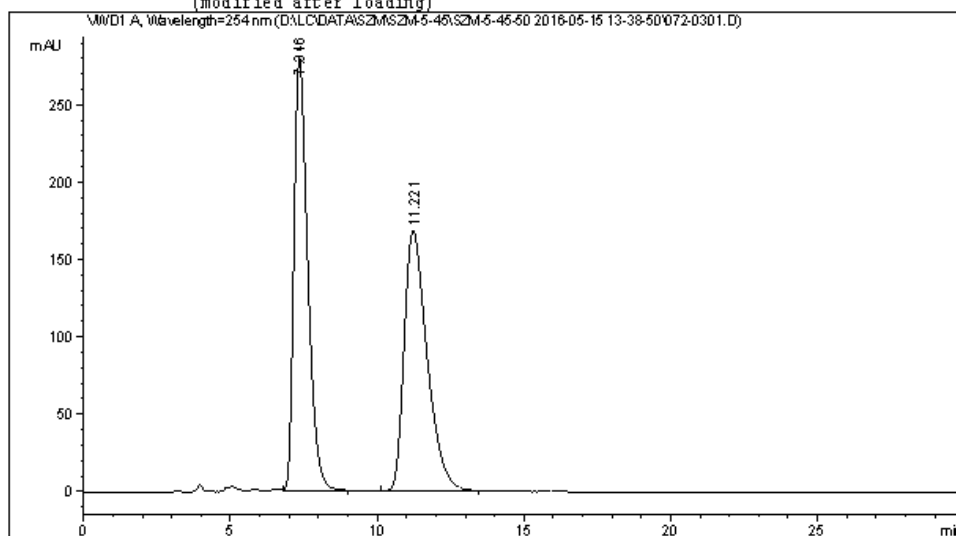

# Area Percent Report

```
=====
Sorted By      : Signal
Multiplier     : 1.0000
Dilution       : 1.0000
Use Multiplier & Dilution Factor with ISTDs
=====
```

Signal 1: VWD1 A, Wavelength=254 nm

| Peak # | RetTime [min] | Type | Width [min] | Area mAU *s | Height [mAU] | Area %  |
|--------|---------------|------|-------------|-------------|--------------|---------|
| 1      | 7.346         | VB   | 0.4998      | 9149.66797  | 279.53934    | 50.0163 |
| 2      | 11.221        | BB   | 0.8298      | 9143.70312  | 168.08777    | 49.9837 |

Totals : 1.82934e4 447.62711

Instrument 1 5/15/2016 10:12:25 PM WZF

Page 1 of 1

Data File D:\LC\DATA\SZM\SZM-5-50\SZM-5-50-2 2016-03-28 17-24-20\083-0101.D  
Sample Name: SZM-5-50-2

```
=====
Acq. Operator   : LHC                      Seq. Line :    1
Acq. Instrument : Instrument 1              Location  : Vial 83
Injection Date  : 3/28/2016 5:26:15 PM      Inj       :    1
                                           Inj Volume: 5 µl
Acq. Method     : D:\LC\DATA\SZM\SZM-5-50\SZM-5-50-2 2016-03-28 17-24-20\ASH-20-80-1ML-
254NM-20MIN.M
Last changed    : 3/28/2016 11:02:44 AM by LHC
Analysis Method : D:\LC\DATA\SZM\SZM-5-50\SZM-5-50-2 2016-03-28 17-24-20\083-0101.D\DA.M (
ASH-20-80-1ML-254NM-20MIN.M)
Last changed    : 5/14/2016 10:18:07 PM by WZF
(modified after loading)
=====
```

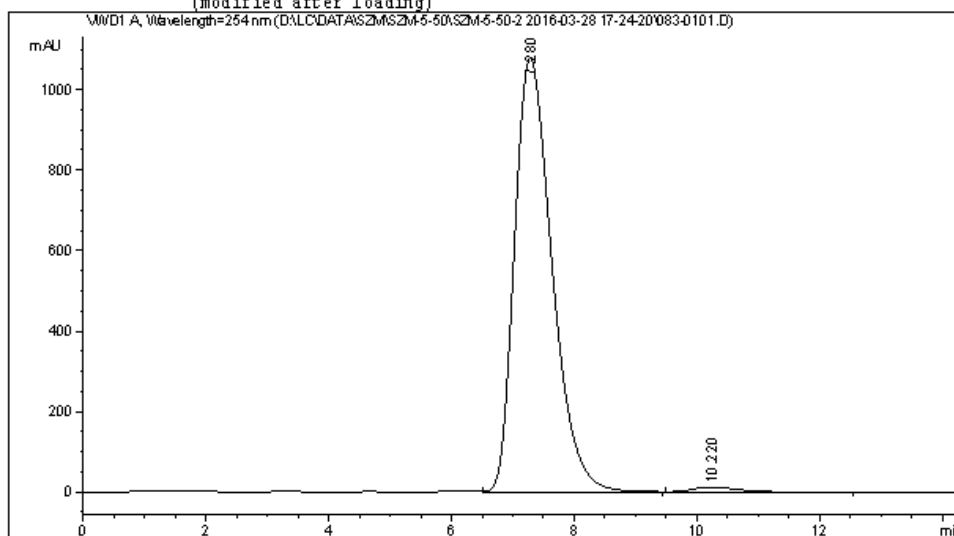

=====  
Area Percent Report  
=====

Sorted By : Signal  
Multiplier : 1.0000  
Dilution : 1.0000  
Use Multiplier & Dilution Factor with ISTDs

Signal 1: VMD1 A, Wavelength=254 nm

| Peak # | RetTime [min] | Type | Width [min] | Area mAU *s | Height [mAU] | Area %  |
|--------|---------------|------|-------------|-------------|--------------|---------|
| 1      | 7.280         | VB   | 0.6589      | 4.57762e4   | 1077.08020   | 98.5681 |
| 2      | 10.220        | BB   | 0.7376      | 664.98889   | 12.78951     | 1.4319  |

Totals : 4.64412e4 1089.86971

Instrument 1 5/14/2016 10:18:12 PM WZF

Page 1 of 1

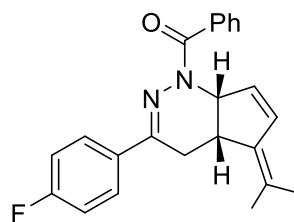

( (4a*S*,7a*R*)-**3e** )

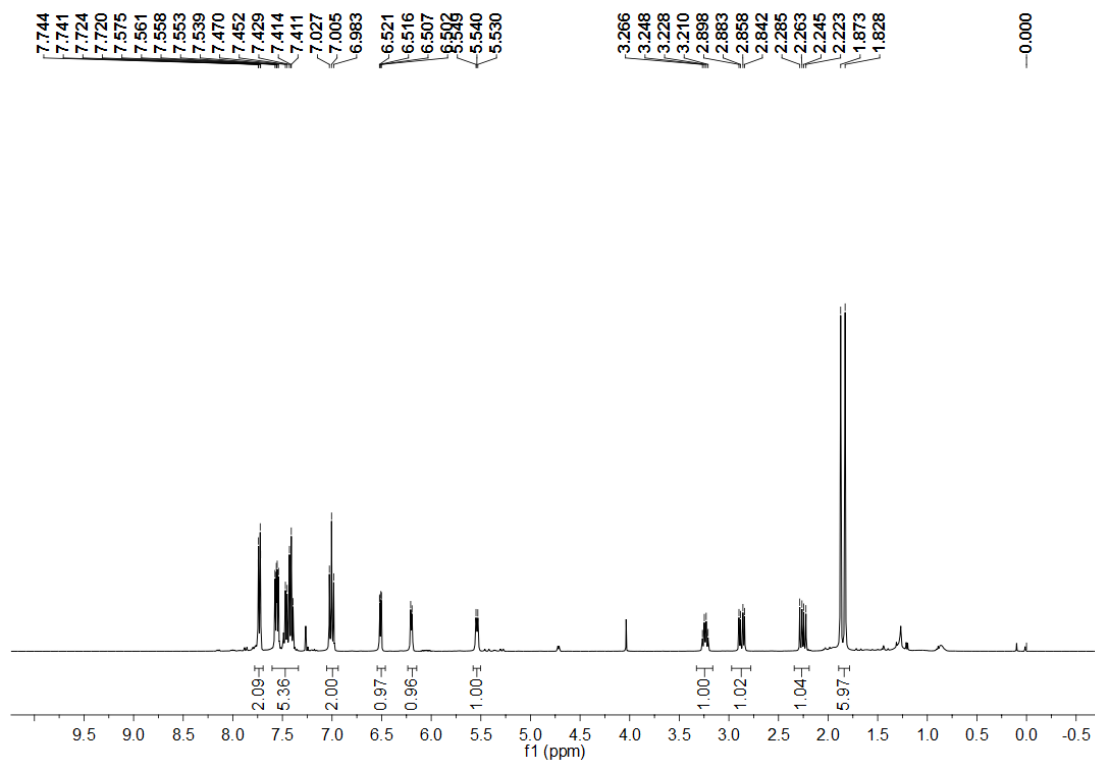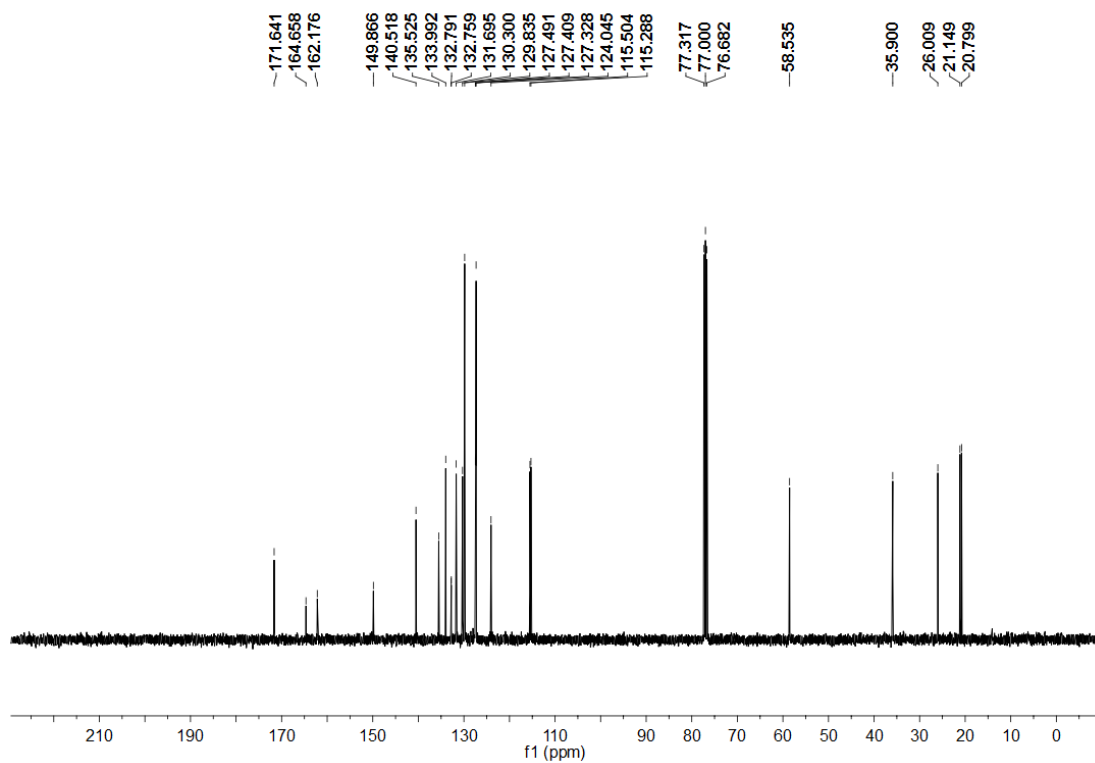

Data File D:\LC\DATA\SZM\SZM-5-45\SZM-5-45-C 2016-03-30 23-02-22\087-0701.D  
Sample Name: SZM-5-45-J

```
=====
Acq. Operator   : LHC                      Seq. Line :    7
Acq. Instrument : Instrument 1              Location  : Vial 87
Injection Date  : 3/31/2016 1:12:36 AM      Inj       :    1
                                           Inj Volume: 5 µl
Acq. Method     : D:\LC\DATA\SZM\SZM-5-45\SZM-5-45-C 2016-03-30 23-02-22\ASH-20-80-1ML-
254NM-20MIN.M
Last changed    : 3/28/2016 11:02:44 AM by LHC
Analysis Method : D:\LC\DATA\SZM\SZM-5-45\SZM-5-45-C 2016-03-30 23-02-22\087-0701.D\DA.M (
ASH-20-80-1ML-254NM-20MIN.M)
Last changed    : 5/14/2016 10:14:13 PM by WZF
(modified after loading)
=====
```

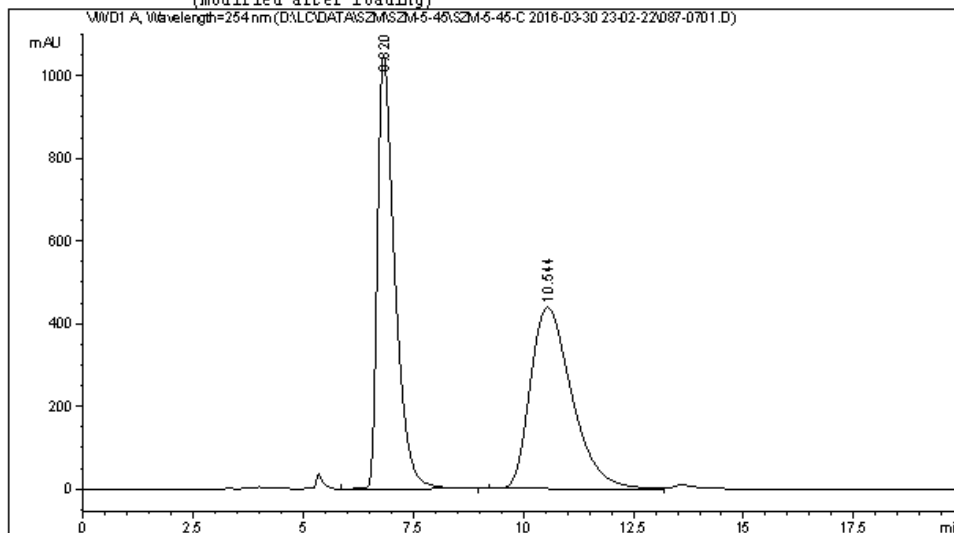

# Area Percent Report

```
Sorted By      : Signal
Multiplier     : 1.0000
Dilution       : 1.0000
Use Multiplier & Dilution Factor with ISTDs
```

Signal 1: VMD1 A, Wavelength=254 nm

| Peak # | RetTime [min] | Type | Width [min] | Area mAU  | Height [mAU] | Area %  |
|--------|---------------|------|-------------|-----------|--------------|---------|
| 1      | 6.820         | BB   | 0.4071      | 2.87210e4 | 1048.05139   | 50.0225 |
| 2      | 10.544        | BB   | 1.0142      | 2.86952e4 | 439.14487    | 49.9775 |

Totals : 5.74162e4 1487.19626

Data File D:\LC\DATA\SZM\SZM-5-50\SZM-5-50-8 2016-03-31 17-09-56\083-0301.D  
Sample Name: SZM-5-50-11

```
=====
Acq. Operator   : LHC                      Seq. Line :    3
Acq. Instrument : Instrument 1              Location  : Vial 83
Injection Date  : 3/31/2016 5:54:01 PM      Inj       :    1
                                           Inj Volume: 5 µl
Acq. Method     : D:\LC\DATA\SZM\SZM-5-50\SZM-5-50-8 2016-03-31 17-09-56\ASH-20-80-1ML-
254NM-20MIN.M
Last changed    : 3/28/2016 11:02:44 AM by LHC
Analysis Method : D:\LC\DATA\SZM\SZM-5-50\SZM-5-50-8 2016-03-31 17-09-56\083-0301.D\DA.M (
ASH-20-80-1ML-254NM-20MIN.M)
Last changed    : 5/14/2016 10:31:00 PM by WZF
(modified after loading)
=====
```

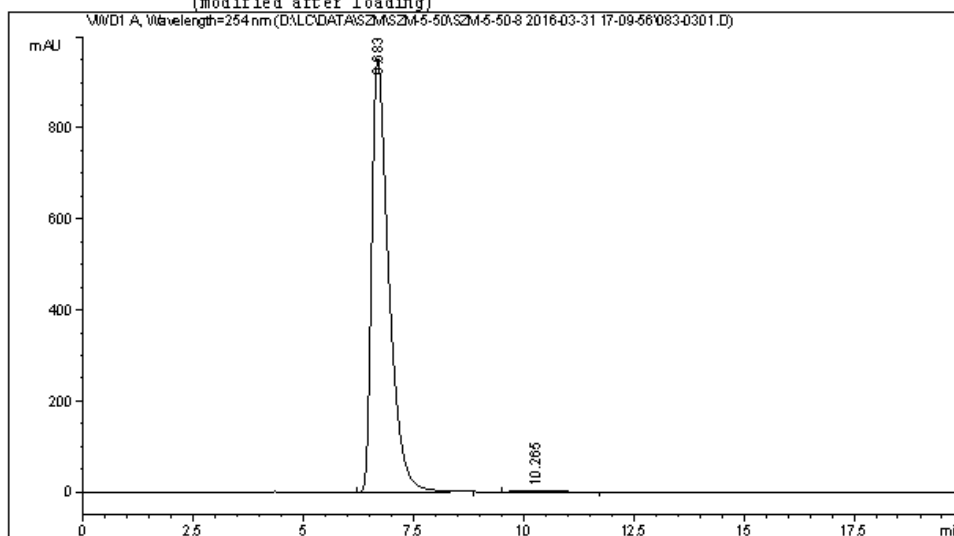

# Area Percent Report

```
=====
Sorted By      :      Signal
Multiplier     :      1.0000
Dilution       :      1.0000
Use Multiplier & Dilution Factor with ISTDs
=====
```

Signal 1: VMD1 A, Wavelength=254 nm

| Peak # | RetTime [min] | Type | Width [min] | Area mAU *s | Height [mAU] | Area %  |
|--------|---------------|------|-------------|-------------|--------------|---------|
| 1      | 6.683         | BB   | 0.3995      | 2.55972e4   | 952.40466    | 99.4755 |
| 2      | 10.265        | BB   | 0.6722      | 134.96884   | 2.38393      | 0.5245  |

Totals : 2.57322e4 954.78859

Instrument 1 5/14/2016 10:31:05 PM WZF

Page 1 of 1

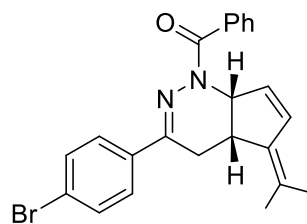

( (4aS,7aR)-3f )

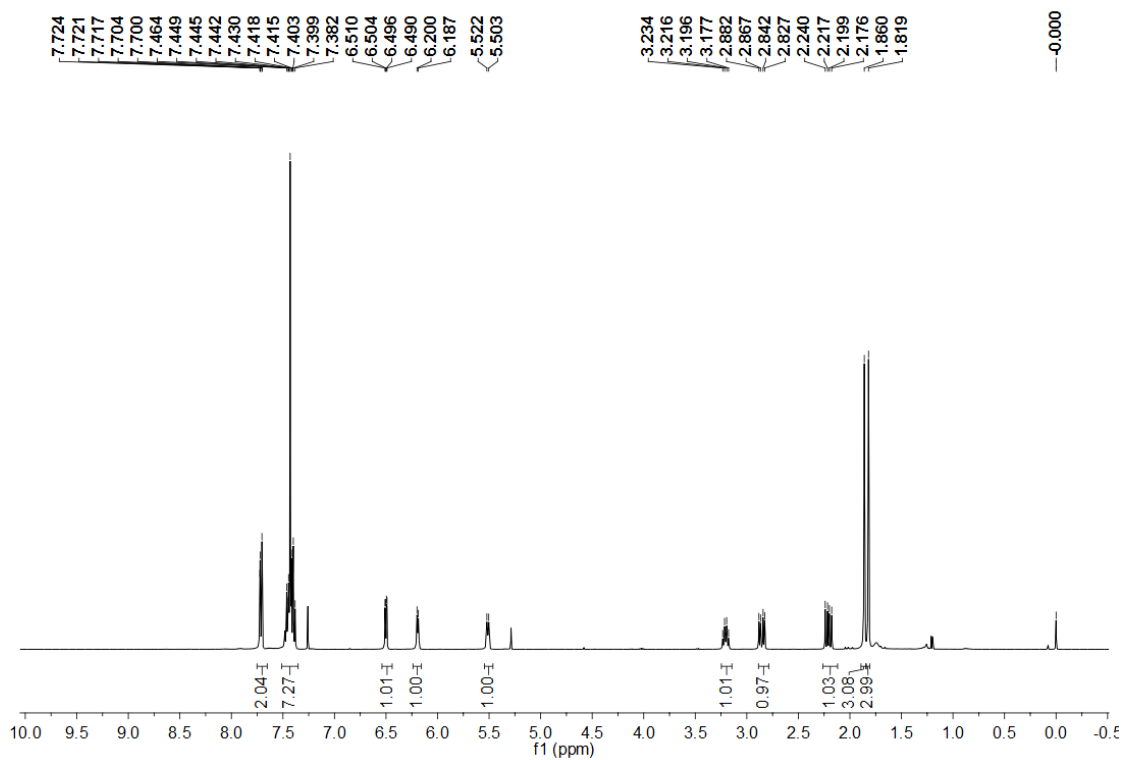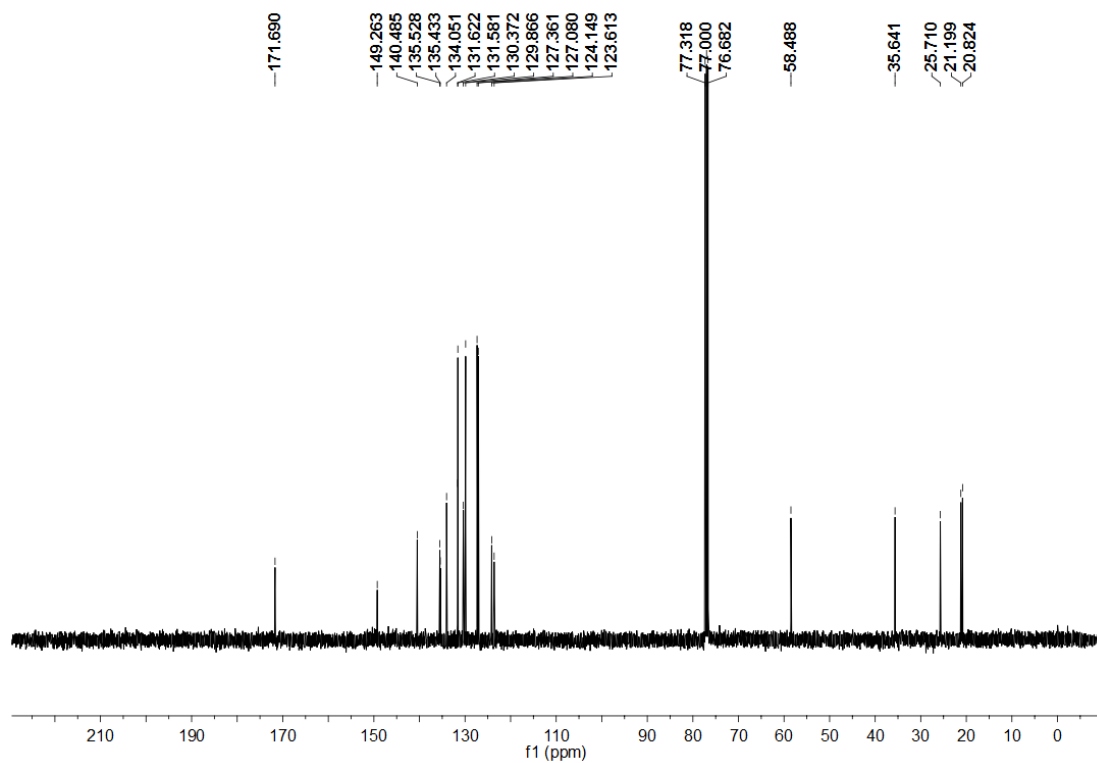

Data File D:\LC\DATA\SZM\SZM-5-45\SZM-5-45-C 2016-03-30 23-02-22\085-0501.D  
Sample Name: SZM-5-45-G

```
=====
Acq. Operator   : LHC                      Seq. Line :    5
Acq. Instrument : Instrument 1              Location  : Vial 85
Injection Date  : 3/31/2016 12:29:29 AM    Inj       :    1
                                           Inj Volume: 5 µl
Acq. Method     : D:\LC\DATA\SZM\SZM-5-45\SZM-5-45-C 2016-03-30 23-02-22\ASH-20-80-1ML-
254NM-20MIN.M
Last changed    : 3/28/2016 11:02:44 AM by LHC
Analysis Method : D:\LC\DATA\SZM\SZM-5-45\SZM-5-45-C 2016-03-30 23-02-22\085-0501.D\DA.M (
ASH-20-80-1ML-254NM-20MIN.M)
Last changed    : 5/14/2016 10:12:54 PM by WZF
(modified after loading)
=====
```

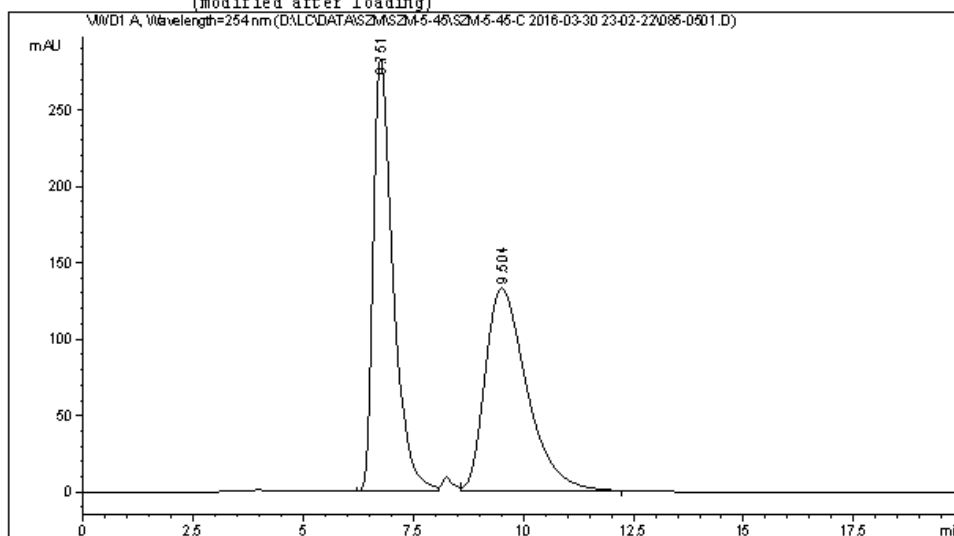

# Area Percent Report

```
Sorted By      : Signal
Multiplier     : 1.0000
Dilution       : 1.0000
Use Multiplier & Dilution Factor with ISTDs
```

Signal 1: VMD1 A, Wavelength=254 nm

| Peak # | RetTime [min] | Type | Width [min] | Area mAU *s | Height [mAU] | Area %  |
|--------|---------------|------|-------------|-------------|--------------|---------|
| 1      | 6.751         | BV   | 0.4718      | 8908.26563  | 283.23007    | 50.3720 |
| 2      | 9.504         | VB   | 1.0035      | 8776.67773  | 132.88991    | 49.6280 |

Totals : 1.76849e4 416.11998

Instrument 1 5/14/2016 10:12:57 PM WZF

Page 1 of 1

Data File D:\LC\DATA\SZM\SZM-5-50\SZM-5-50-8 2016-03-31 17-09-56\081-0101.D  
Sample Name: SZM-5-50-8

```
=====
Acq. Operator   : LHC                      Seq. Line :    1
Acq. Instrument : Instrument 1              Location  : Vial 81
Injection Date  : 3/31/2016 5:11:35 PM      Inj       :    1
                                           Inj Volume: 5 µl
Acq. Method     : D:\LC\DATA\SZM\SZM-5-50\SZM-5-50-8 2016-03-31 17-09-56\ASH-20-80-1ML-
254NM-20MIN.M
Last changed    : 3/28/2016 11:02:44 AM by LHC
Analysis Method : D:\LC\DATA\SZM\SZM-5-50\SZM-5-50-8 2016-03-31 17-09-56\081-0101.D\DA.M (
ASH-20-80-1ML-254NM-20MIN.M)
Last changed    : 5/14/2016 10:29:56 PM by WZF
(modified after loading)
=====
```

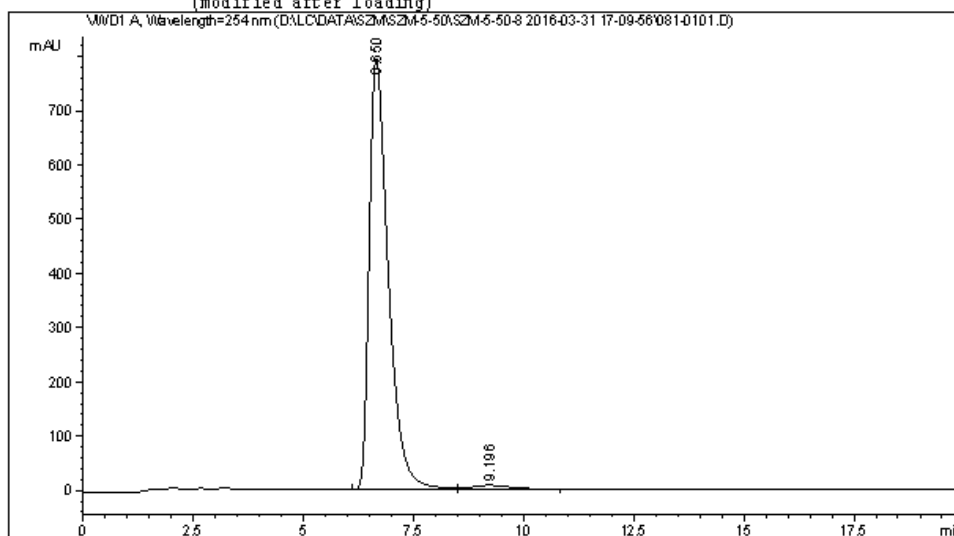

# Area Percent Report

```
=====
Sorted By      :      Signal
Multiplier     :      1.0000
Dilution       :      1.0000
Use Multiplier & Dilution Factor with ISTDs
=====
```

Signal 1: VMD1 A, Wavelength=254 nm

| Peak # | RetTime [min] | Type | Width [min] | Area mAU *s | Height [mAU] | Area %  |
|--------|---------------|------|-------------|-------------|--------------|---------|
| 1      | 6.650         | BB   | 0.4530      | 2.37782e4   | 793.55023    | 98.2326 |
| 2      | 9.196         | BB   | 0.7535      | 427.82095   | 7.14865      | 1.7674  |

Totals : 2.42060e4 800.69888

Instrument 1 5/14/2016 10:30:00 PM WZF

Page 1 of 1



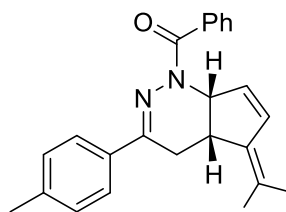

( (4a*S*,7a*R*)-**3g** )

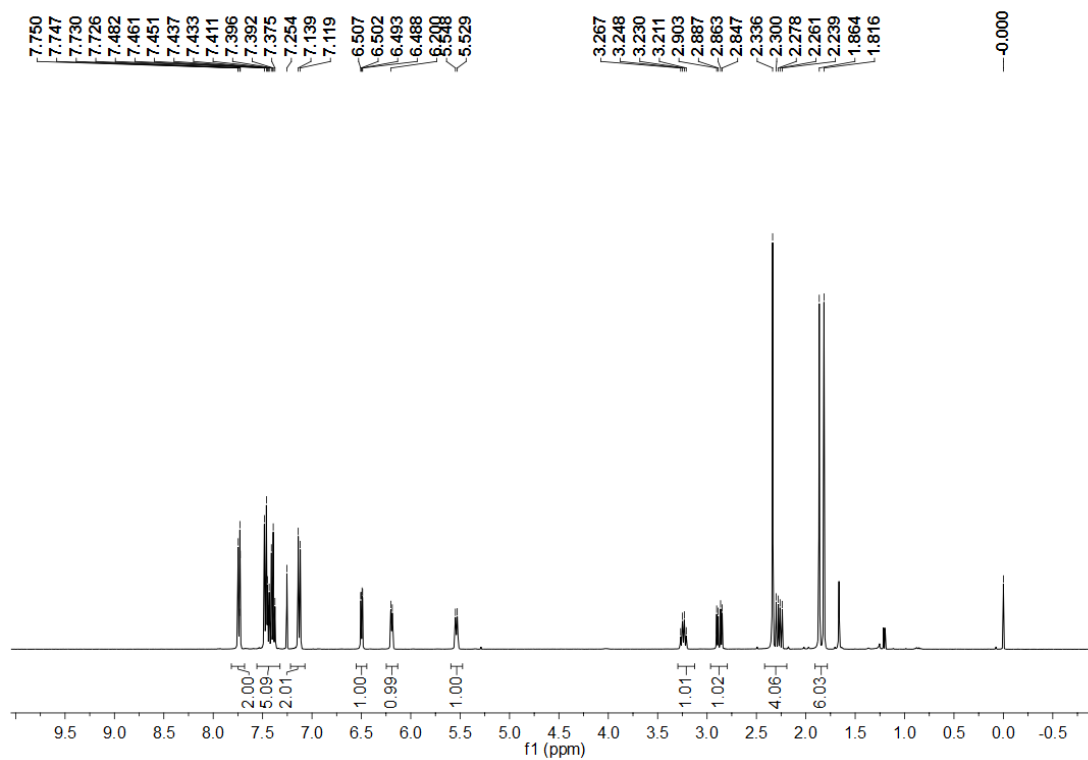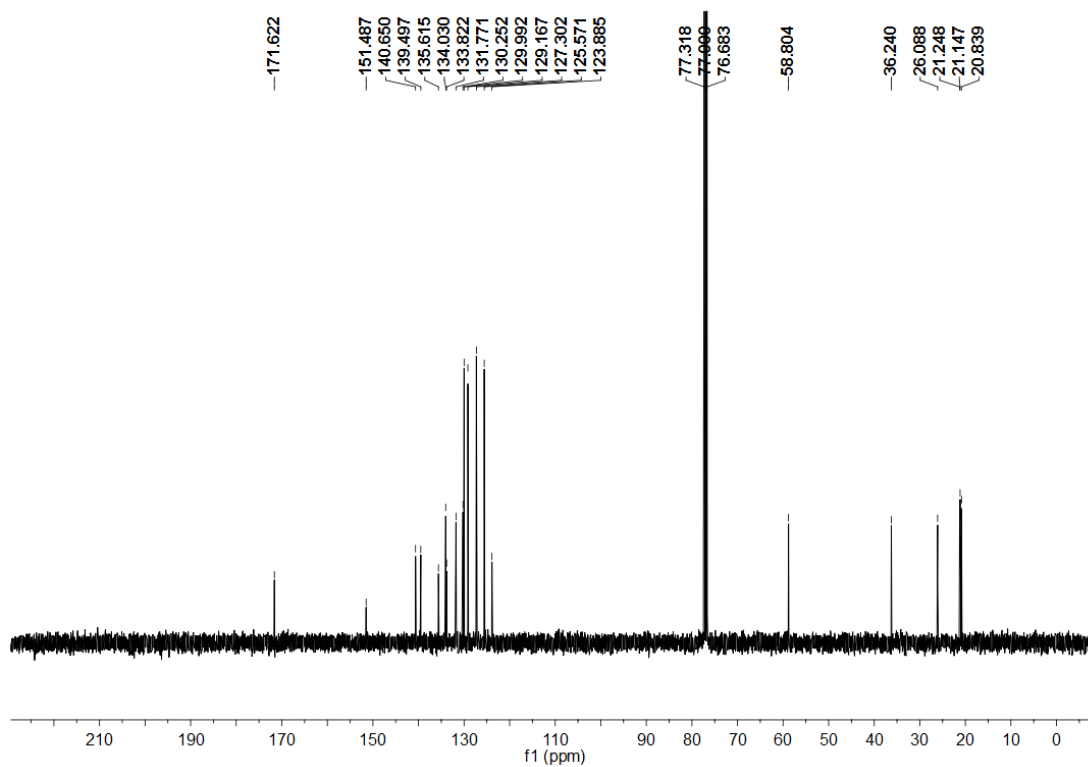

Data File D:\LC\DATA\SZM\SZM-5-45\SZM-5-45-C 2016-03-30 23-02-22\084-0401.D  
Sample Name: SZM-5-45-F

```
=====
Acq. Operator   : LHC                      Seq. Line :    4
Acq. Instrument : Instrument 1              Location  : Vial 84
Injection Date  : 3/31/2016 12:07:58 AM    Inj       :    1
                                           Inj Volume: 5 µl
Acq. Method     : D:\LC\DATA\SZM\SZM-5-45\SZM-5-45-C 2016-03-30 23-02-22\ASH-20-80-1ML-
254NM-20MIN.M
Last changed    : 3/28/2016 11:02:44 AM by LHC
Analysis Method : D:\LC\DATA\SZM\SZM-5-45\SZM-5-45-C 2016-03-30 23-02-22\084-0401.D\DA.M (
ASH-20-80-1ML-254NM-20MIN.M)
Last changed    : 5/14/2016 10:12:20 PM by WZF
(modified after loading)
=====
```

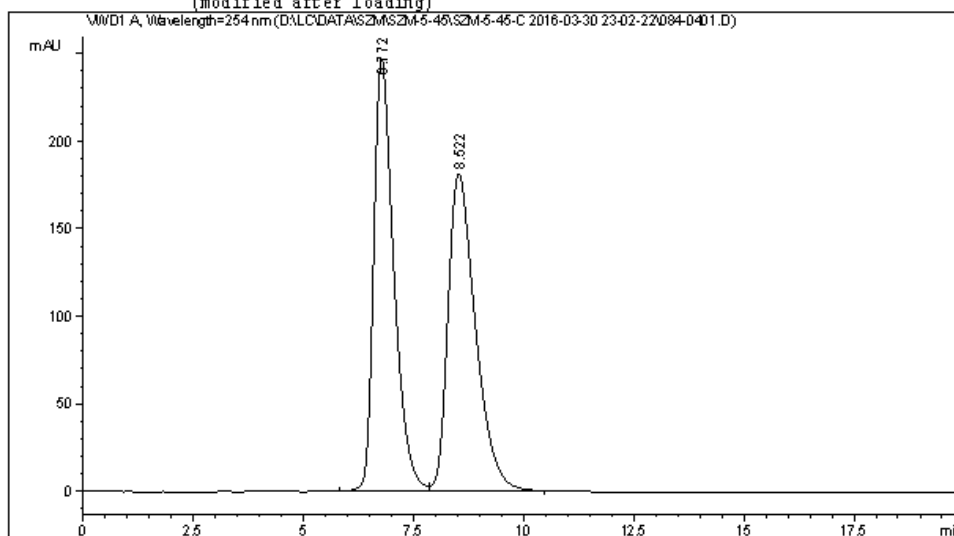

# Area Percent Report

```
=====
Sorted By      :      Signal
Multiplier     :      1.0000
Dilution       :      1.0000
Use Multiplier & Dilution Factor with ISTDs
=====
```

Signal 1: VMD1 A, Wavelength=254 nm

| Peak # | RetTime [min] | Type | Width [min] | Area mAU *s | Height [mAU] | Area %  |
|--------|---------------|------|-------------|-------------|--------------|---------|
| 1      | 6.772         | BV   | 0.4803      | 7861.48926  | 247.16179    | 49.9608 |
| 2      | 8.522         | VB   | 0.6610      | 7873.83447  | 181.31389    | 50.0392 |

```
Totals :                      1.57353e4  428.47568
=====
```

Instrument 1 5/14/2016 10:12:24 PM WZF

Page 1 of 1

Data File D:\LC\DATA\SZM\SZM-5-50\SZM-5-50-7 2016-03-30 10-44-58\081-0101.D  
Sample Name: SZM-5-50-7

```
=====
Acq. Operator   : LHC                      Seq. Line :    1
Acq. Instrument : Instrument 1              Location  : Vial 81
Injection Date  : 3/30/2016 10:46:27 AM    Inj       :    1
                                           Inj Volume: 5 µl
Acq. Method     : D:\LC\DATA\SZM\SZM-5-50\SZM-5-50-7 2016-03-30 10-44-58\ASH-20-80-1ML-
254NM-20MIN.M
Last changed    : 3/28/2016 11:02:44 AM by LHC
Analysis Method : D:\LC\DATA\SZM\SZM-5-50\SZM-5-50-7 2016-03-30 10-44-58\081-0101.D\DA.M (
ASH-20-80-1ML-254NM-20MIN.M)
Last changed    : 11/20/2017 7:13:32 PM by LHC
(modified after loading)
=====
```

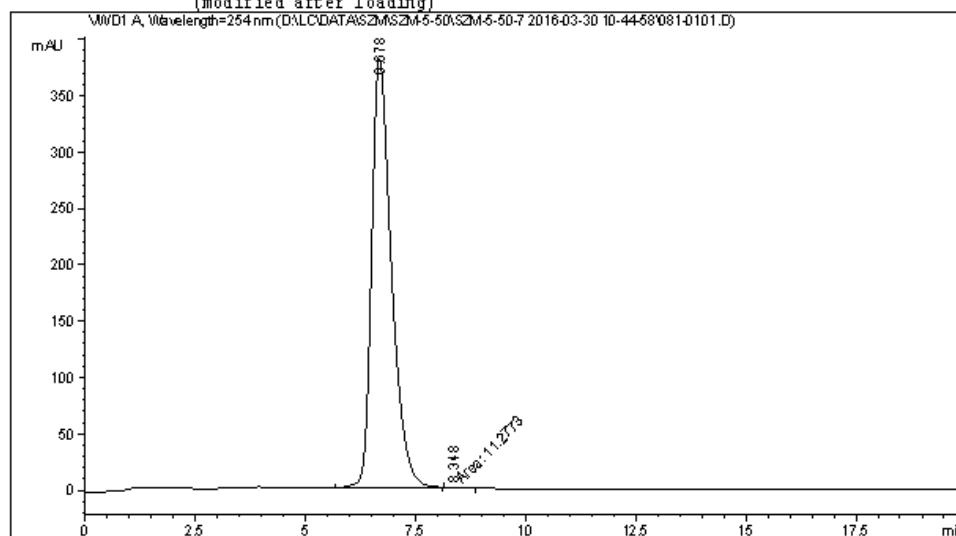

=====  
Area Percent Report  
=====

Sorted By : Signal  
Multiplier : 1.0000  
Dilution : 1.0000  
Use Multiplier & Dilution Factor with ISTDs

Signal 1: VMD1 A, Wavelength=254 nm

| Peak # | RetTime [min] | Type | Width [min] | Area mAU  | Area %  | Height [mAU] |
|--------|---------------|------|-------------|-----------|---------|--------------|
| 1      | 6.678         | BB   | 0.4702      | 1.19242e4 | 99.9055 | 380.78717    |
| 2      | 8.348         | MM   | 0.4232      | 11.27725  | 0.0945  | 4.44163e-1   |

Totals : 1.19355e4 381.23133

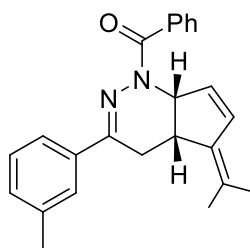

( (4a*S*,7a*R*)-**3h** )

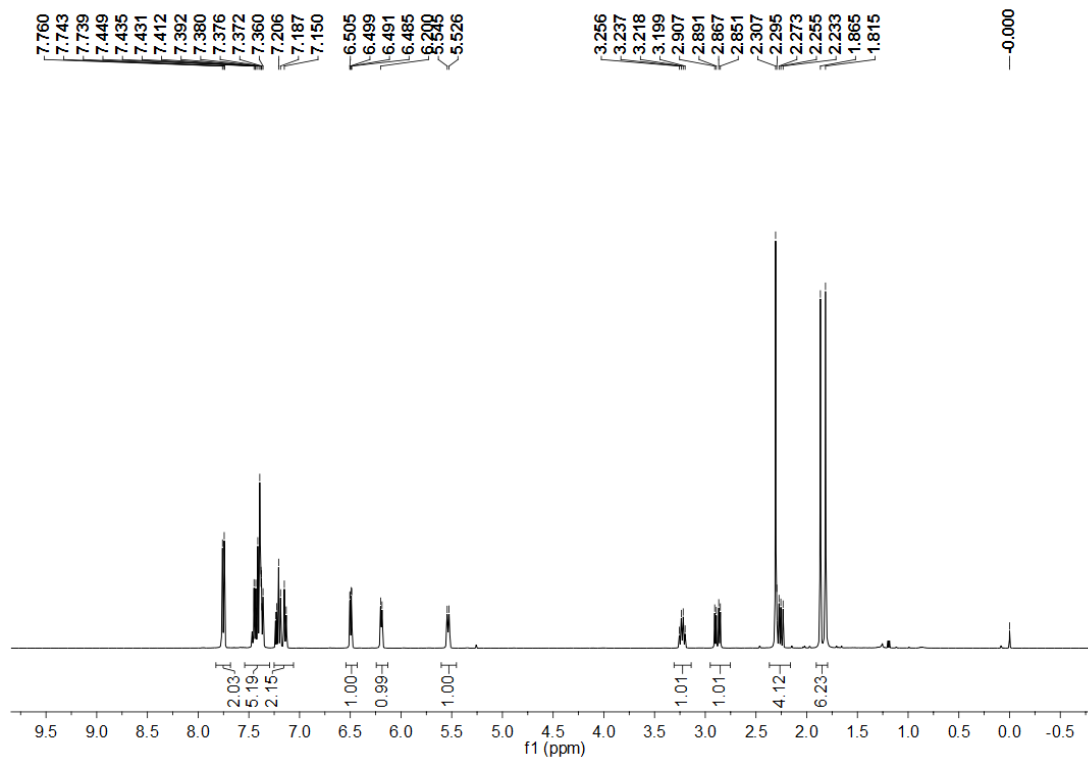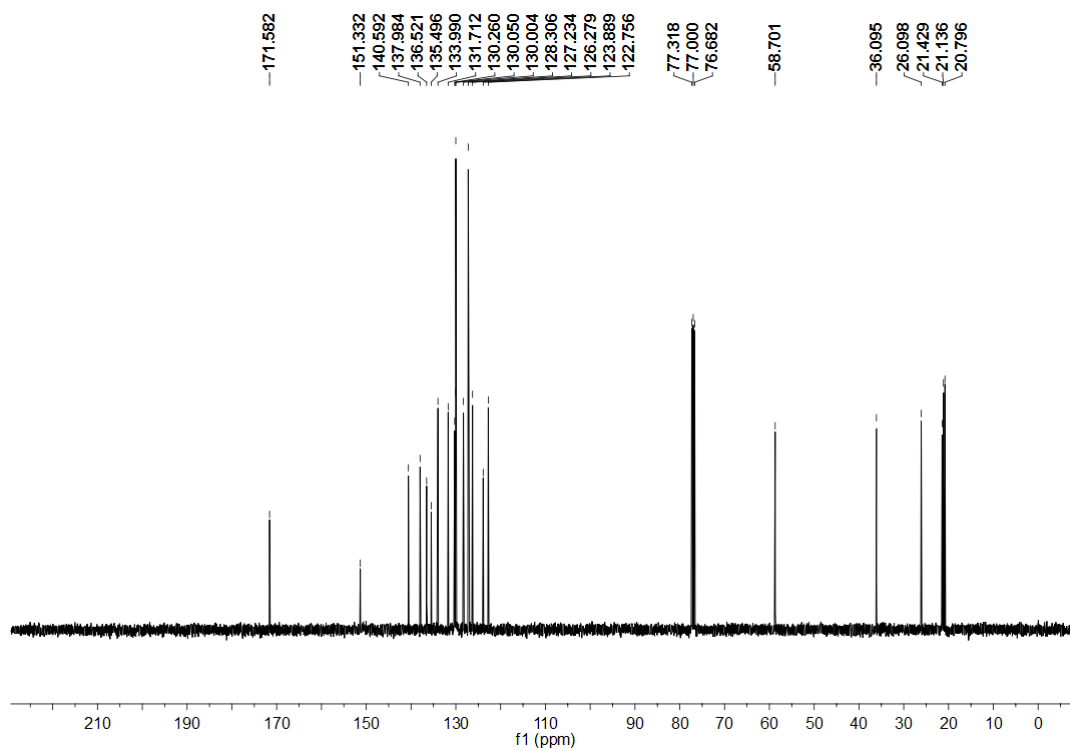

Data File D:\LC\DATA\SZM\SZM-5-45\SZM-5-45-C 2016-03-30 23-02-22\083-0301.D  
Sample Name: SZM-5-45-E

```
=====
Acq. Operator   : LHC                      Seq. Line :    3
Acq. Instrument : Instrument 1              Location  : Vial 83
Injection Date  : 3/30/2016 11:46:32 PM    Inj       :    1
                                           Inj Volume: 5 µl
Acq. Method     : D:\LC\DATA\SZM\SZM-5-45\SZM-5-45-C 2016-03-30 23-02-22\ASH-20-80-1ML-
254NM-20MIN.M
Last changed    : 3/28/2016 11:02:44 AM by LHC
Analysis Method : D:\LC\DATA\SZM\SZM-5-45\SZM-5-45-C 2016-03-30 23-02-22\083-0301.D\DA.M (
ASH-20-80-1ML-254NM-20MIN.M)
Last changed    : 5/14/2016 10:11:52 PM by WZF
(modified after loading)
=====
```

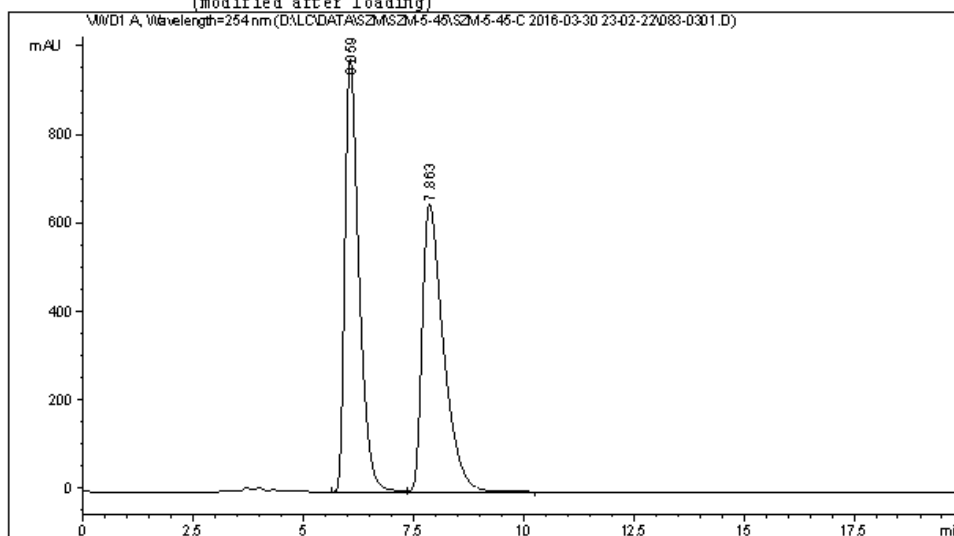

# Area Percent Report

```
=====
Sorted By      :      Signal
Multiplier     :      1.0000
Dilution       :      1.0000
Use Multiplier & Dilution Factor with ISTDs
=====
```

Signal 1: VMD1 A, Wavelength=254 nm

| Peak # | RetTime [min] | Type | Width [min] | Area mAU *s | Height [mAU] | Area %  |
|--------|---------------|------|-------------|-------------|--------------|---------|
| 1      | 6.059         | BV   | 0.3345      | 2.18704e4   | 980.55292    | 50.0591 |
| 2      | 7.863         | VB   | 0.5022      | 2.18188e4   | 650.16644    | 49.9409 |

Totals : 4.36892e4 1630.71936

Data File D:\LC\DATA\SZM\SZM-5-50\SZM-5-50-5 2016-03-30 21-43-34\082-0201.D  
Sample Name: SZM-5-50-6

```
=====
Acq. Operator   : LHC                      Seq. Line :    2
Acq. Instrument : Instrument 1              Location  : Vial 82
Injection Date  : 3/30/2016 10:06:28 PM    Inj       :    1
                                           Inj Volume: 5 µl
Acq. Method     : D:\LC\DATA\SZM\SZM-5-50\SZM-5-50-5 2016-03-30 21-43-34\ASH-20-80-1ML-
254NM-20MIN.M
Last changed    : 3/28/2016 11:02:44 AM by LHC
Analysis Method : D:\LC\DATA\SZM\SZM-5-50\SZM-5-50-5 2016-03-30 21-43-34\082-0201.D\DA.M (
ASH-20-80-1ML-254NM-20MIN.M)
Last changed    : 5/14/2016 10:28:32 PM by WZF
(modified after loading)
=====
```

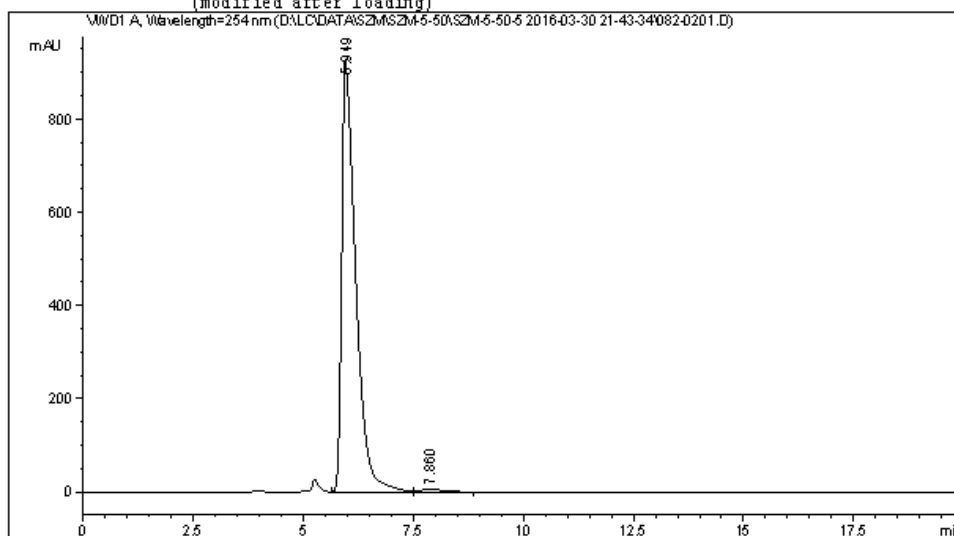

# Area Percent Report

```
=====
Sorted By      :      Signal
Multiplier     :      1.0000
Dilution       :      1.0000
Use Multiplier & Dilution Factor with ISTDs
=====
```

Signal 1: VMD1 A, Wavelength=254 nm

| Peak # | RetTime [min] | Type | Width [min] | Area mAU *s | Height [mAU] | Area %  |
|--------|---------------|------|-------------|-------------|--------------|---------|
| 1      | 5.949         | W    | 0.3302      | 2.04086e4   | 930.22241    | 98.9624 |
| 2      | 7.860         | VB   | 0.4731      | 213.97714   | 6.23669      | 1.0376  |

Totals :                    2.06225e4   936.45910

Instrument 1 5/14/2016 10:28:36 PM WZF

Page 1 of 1

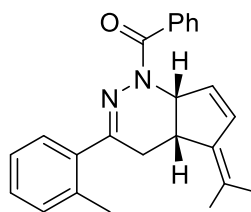

( (4a*S*,7a*R*)-**3i** )

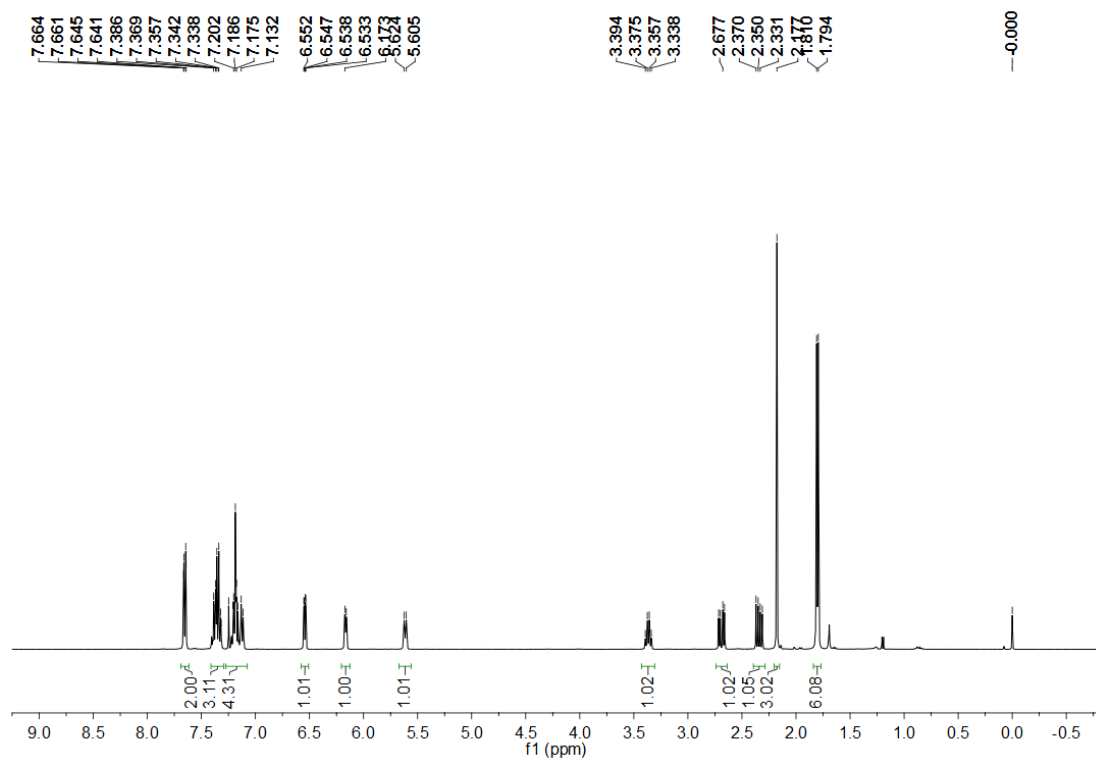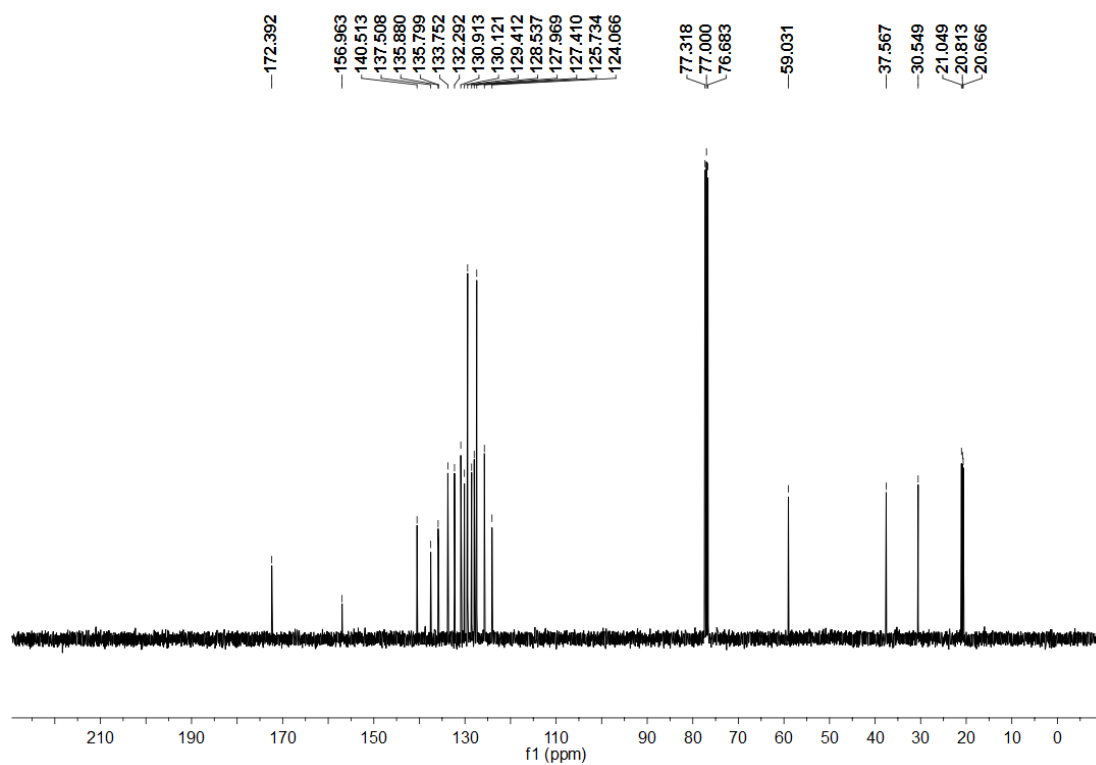

Data File D:\LC\DATA\SZM\SZM-5-45\SZM-5-45-C 2016-03-30 23-02-22\082-0201.D  
Sample Name: SZM-5-45-D

```
=====
Acq. Operator   : LHC                      Seq. Line :    2
Acq. Instrument : Instrument 1              Location  : Vial 82
Injection Date  : 3/30/2016 11:25:01 PM    Inj       :    1
                                           Inj Volume: 5 µl
Acq. Method     : D:\LC\DATA\SZM\SZM-5-45\SZM-5-45-C 2016-03-30 23-02-22\ASH-20-80-1ML-
254NM-20MIN.M
Last changed    : 3/28/2016 11:02:44 AM by LHC
Analysis Method : D:\LC\DATA\SZM\SZM-5-45\SZM-5-45-C 2016-03-30 23-02-22\082-0201.D\DA.M (
ASH-20-80-1ML-254NM-20MIN.M)
Last changed    : 5/14/2016 10:11:04 PM by WZF
(modified after loading)
=====
```

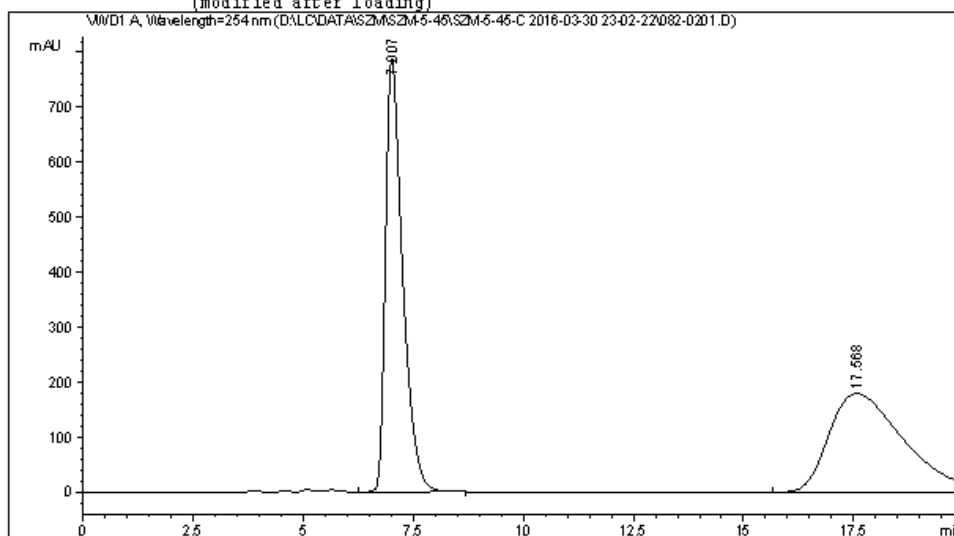

# Area Percent Report

```
=====
Sorted By      :      Signal
Multiplier     :      1.0000
Dilution       :      1.0000
Use Multiplier & Dilution Factor with ISTDs
=====
```

Signal 1: VMD1 A, Wavelength=254 nm

| Peak # | RetTime [min] | Type | Width [min] | Area mAU *s | Height [mAU] | Area %  |
|--------|---------------|------|-------------|-------------|--------------|---------|
| 1      | 7.007         | VB   | 0.4036      | 2.13671e4   | 788.37201    | 50.5964 |
| 2      | 17.568        | BBA  | 1.7334      | 2.08633e4   | 179.46416    | 49.4036 |

```
Totals :                      4.22304e4  967.83617
=====
```

Instrument 1 5/14/2016 10:11:08 PM WZF

Page 1 of 1



Data File D:\LC\DATA\SZM\SZM-5-50\SZM-5-50-5 2016-03-30 21-43-34\081-0101.D  
Sample Name: SZM-5-50-5

```
=====
Acq. Operator   : LHC                      Seq. Line :    1
Acq. Instrument : Instrument 1              Location  : Vial 81
Injection Date  : 3/30/2016 9:45:12 PM      Inj       :    1
                                           Inj Volume: 5 µl
Acq. Method     : D:\LC\DATA\SZM\SZM-5-50\SZM-5-50-5 2016-03-30 21-43-34\ASH-20-80-1ML-
254NM-20MIN.M
Last changed    : 3/28/2016 11:02:44 AM by LHC
Analysis Method : D:\LC\DATA\SZM\SZM-5-50\SZM-5-50-5 2016-03-30 21-43-34\081-0101.D\DA.M (
ASH-20-80-1ML-254NM-20MIN.M)
Last changed    : 5/14/2016 10:27:43 PM by WZF
(modified after loading)
=====
```

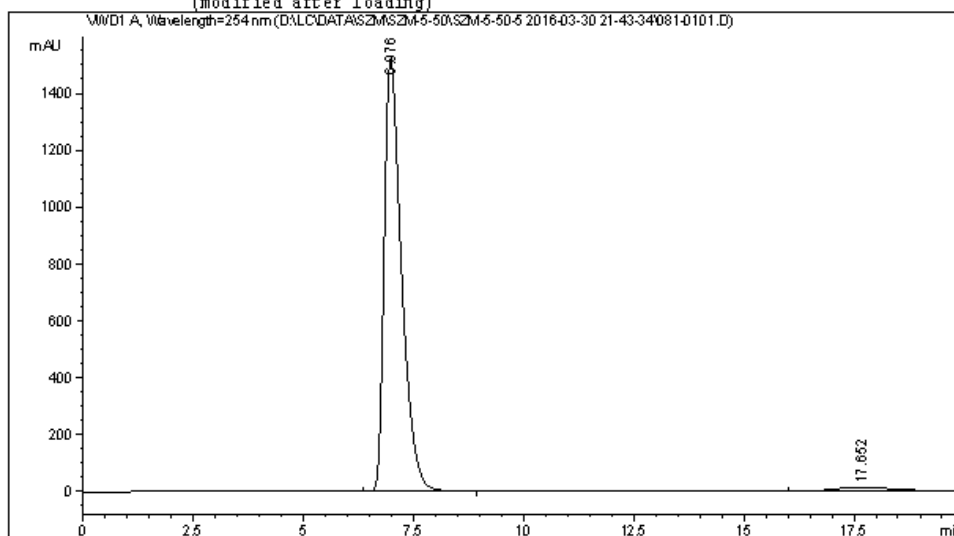

# Area Percent Report

```
=====
Sorted By      :      Signal
Multiplier     :      1.0000
Dilution       :      1.0000
Use Multiplier & Dilution Factor with ISTDs
=====
```

Signal 1: VMD1 A, Wavelength=254 nm

| Peak # | RetTime [min] | Type | Width [min] | Area mAU *s | Height [mAU] | Area %  |
|--------|---------------|------|-------------|-------------|--------------|---------|
| 1      | 6.976         | BB   | 0.4104      | 4.15658e4   | 1521.63916   | 96.4436 |
| 2      | 17.652        | BBA  | 1.2822      | 1532.74951  | 14.20427     | 3.5564  |

Totals : 4.30985e4 1535.84343

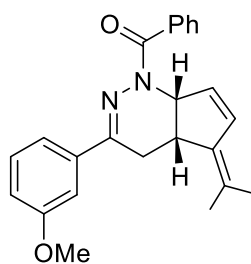

((4a*S*,7a*R*)-**3j**)

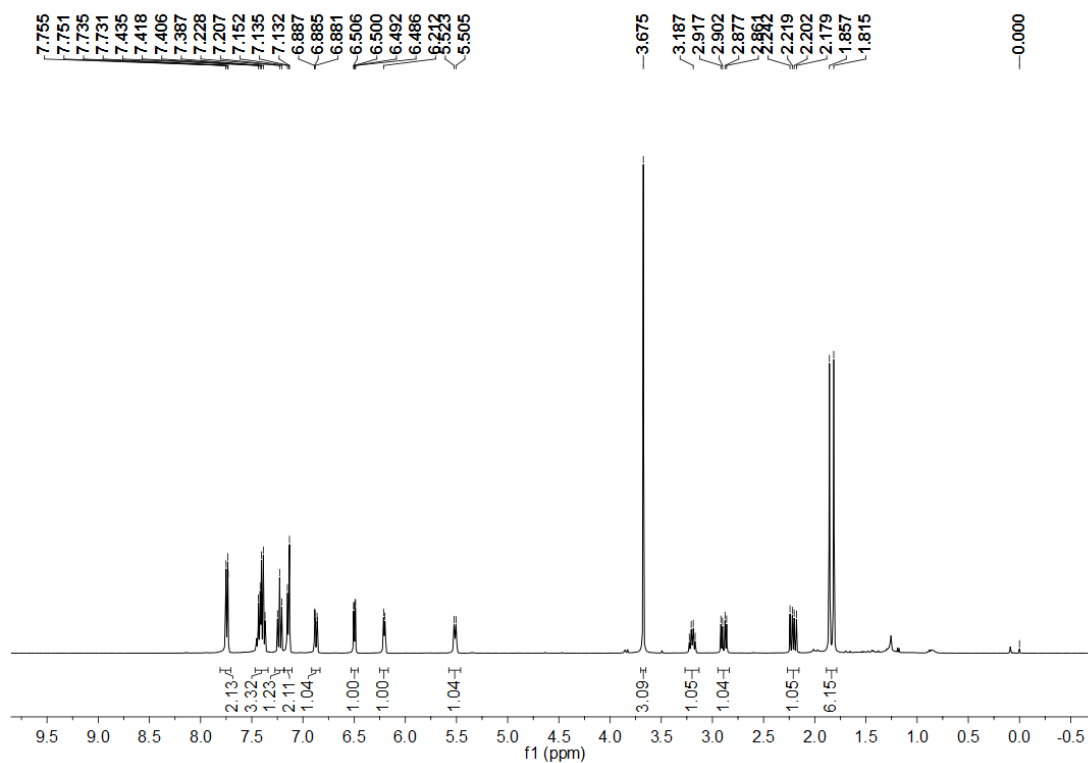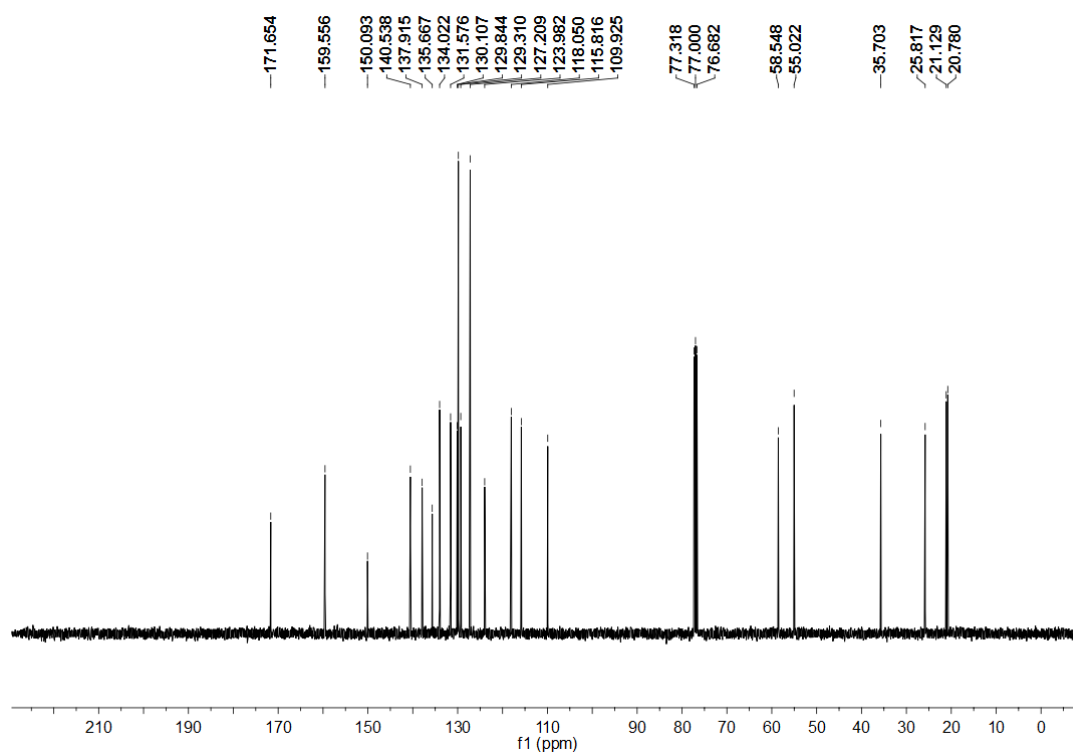

Data File D:\LC\DATA\SZM\SZM-5-45\SZM-5-45-C 2016-03-30 23-02-22\086-0601.D  
Sample Name: SZM-5-45-H

```
=====
Acq. Operator   : LHC                      Seq. Line :    6
Acq. Instrument : Instrument 1              Location  : Vial 86
Injection Date  : 3/31/2016 12:51:02 AM    Inj       :    1
                                           Inj Volume: 5 µl
Acq. Method     : D:\LC\DATA\SZM\SZM-5-45\SZM-5-45-C 2016-03-30 23-02-22\ASH-20-80-1ML-
254NM-20MIN.M
Last changed    : 3/28/2016 11:02:44 AM by LHC
Analysis Method : D:\LC\DATA\SZM\SZM-5-45\SZM-5-45-C 2016-03-30 23-02-22\086-0601.D\DA.M (
ASH-20-80-1ML-254NM-20MIN.M)
Last changed    : 5/14/2016 10:13:37 PM by WZF
(modified after loading)
=====
```

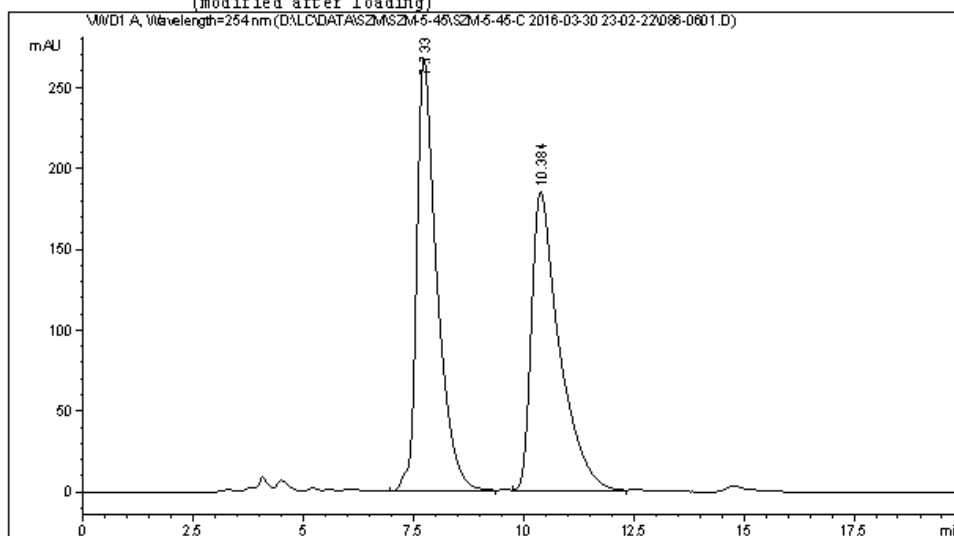

# Area Percent Report

```
Sorted By      : Signal
Multiplier     : 1.0000
Dilution       : 1.0000
Use Multiplier & Dilution Factor with ISTDs
```

Signal 1: VMD1 A, Wavelength=254 nm

| Peak # | RetTime [min] | Type | Width [min] | Area mAU *s | Height [mAU] | Area %  |
|--------|---------------|------|-------------|-------------|--------------|---------|
| 1      | 7.333         | BB   | 0.4658      | 8571.19141  | 267.33536    | 51.0992 |
| 2      | 10.384        | VB   | 0.6404      | 8202.44629  | 185.23439    | 48.9008 |

Totals : 1.67736e4 452.56975

Instrument 1 5/14/2016 10:13:41 PM WZF

Page 1 of 1

Data File D:\LC\DATA\SZM\SZM-5-50\SZM-5-50-8 2016-03-31 17-09-56\082-0201.D  
Sample Name: SZM-5-50-9

```
=====
Acq. Operator   : LHC                      Seq. Line :    2
Acq. Instrument : Instrument 1              Location  : Vial 82
Injection Date  : 3/31/2016 5:32:49 PM      Inj       :    1
                                           Inj Volume: 5 µl
Acq. Method     : D:\LC\DATA\SZM\SZM-5-50\SZM-5-50-8 2016-03-31 17-09-56\ASH-20-80-1ML-
254NM-20MIN.M
Last changed    : 3/28/2016 11:02:44 AM by LHC
Analysis Method : D:\LC\DATA\SZM\SZM-5-50\SZM-5-50-8 2016-03-31 17-09-56\082-0201.D\DA.M (
ASH-20-80-1ML-254NM-20MIN.M)
Last changed    : 5/14/2016 10:30:24 PM by WZF
(modified after loading)
=====
```

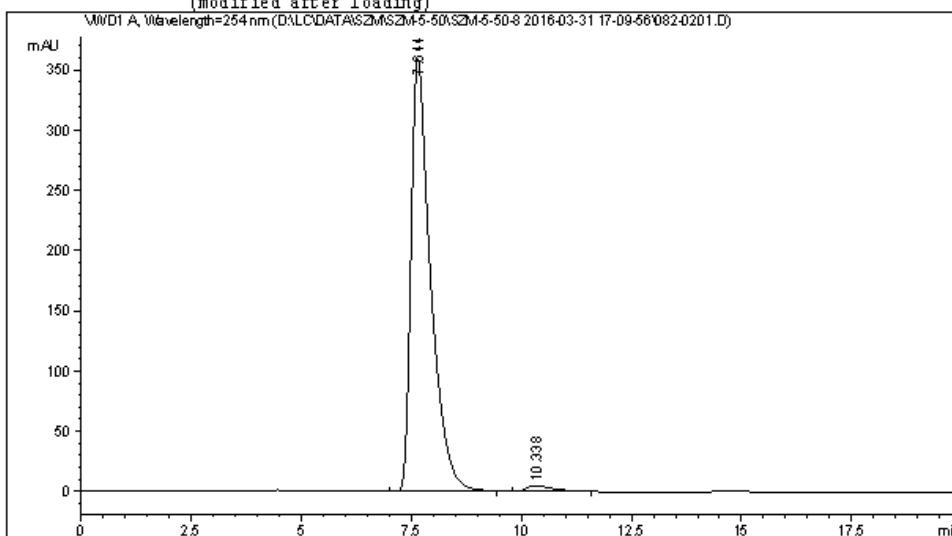

# Area Percent Report

```
=====
Sorted By      :      Signal
Multiplier     :      1.0000
Dilution       :      1.0000
Use Multiplier & Dilution Factor with ISTDs
=====
```

Signal 1: VMD1 A, Wavelength=254 nm

| Peak # | RetTime [min] | Type | Width [min] | Area mAU *s | Height [mAU] | Area %  |
|--------|---------------|------|-------------|-------------|--------------|---------|
| 1      | 7.644         | BB   | 0.4523      | 1.11106e4   | 359.47760    | 98.2102 |
| 2      | 10.338        | BB   | 0.5670      | 202.48689   | 4.89565      | 1.7898  |

Totals : 1.13131e4 364.37325

Instrument 1 5/14/2016 10:30:31 PM WZF

Page 1 of 1

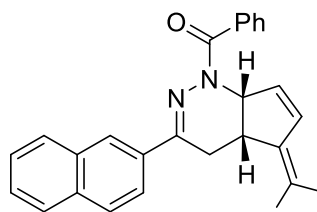

( (4a*S*,7a*R*)-**3k** )

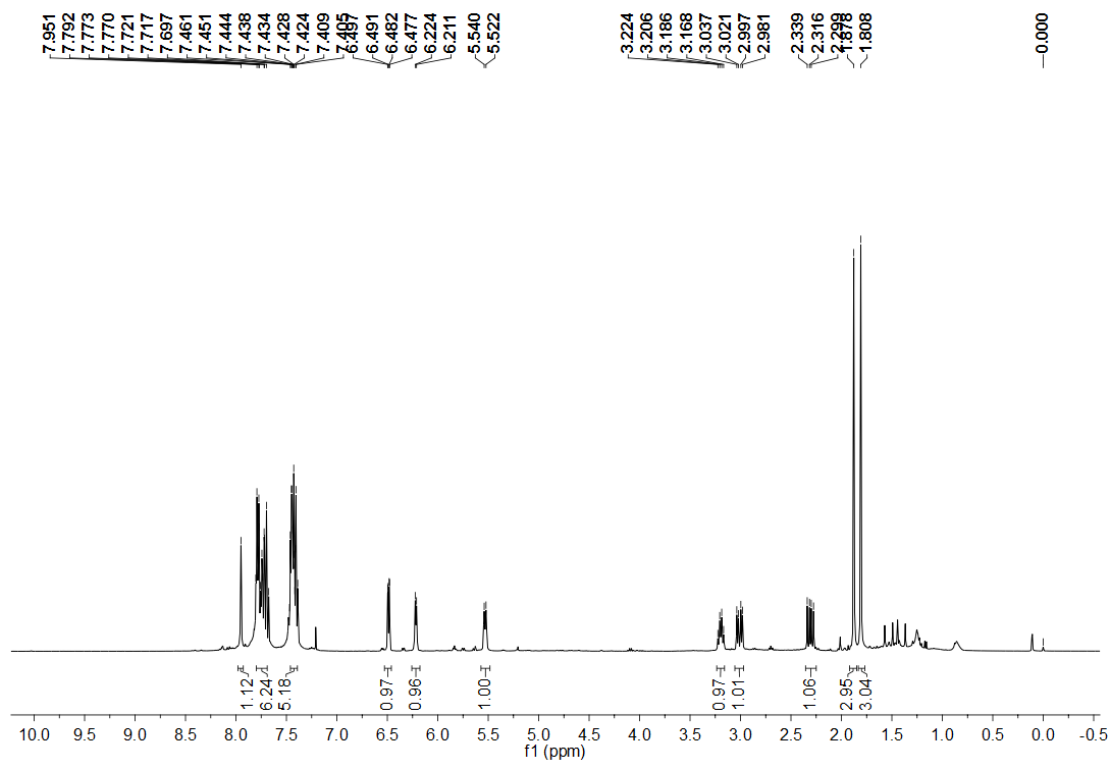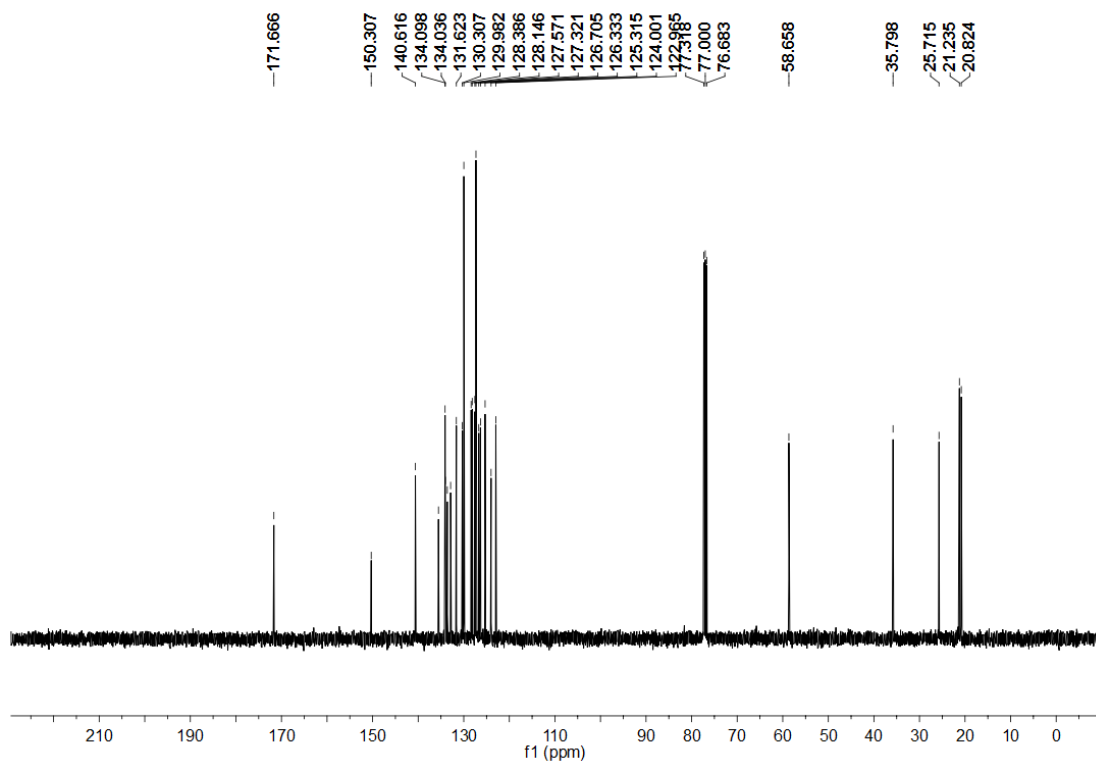

Data File D:\LC\DATA\SZM\SZM-5-45\SZM-5-45-50 2016-05-15 13-38-50\074-0501.D  
Sample Name: SZM-5-45-i

```
=====
Acq. Operator   : WZF                      Seq. Line :    5
Acq. Instrument : Instrument 1              Location  : Vial 74
Injection Date  : 5/15/2016 3:46:16 PM      Inj       :    1
                                           Inj Volume: 5 µl
Acq. Method     : D:\LC\DATA\SZM\SZM-5-45\SZM-5-45-50 2016-05-15 13-38-50\ASH-20-80-1ML-
254NM-30MIN.M
Last changed    : 5/15/2016 1:36:20 PM by WZF
Analysis Method : D:\LC\DATA\SZM\SZM-5-45\SZM-5-45-50 2016-05-15 13-38-50\074-0501.D\DA.M (
ASH-20-80-1ML-254NM-30MIN.M)
Last changed    : 5/15/2016 10:13:56 PM by WZF
(modified after loading)
=====
```

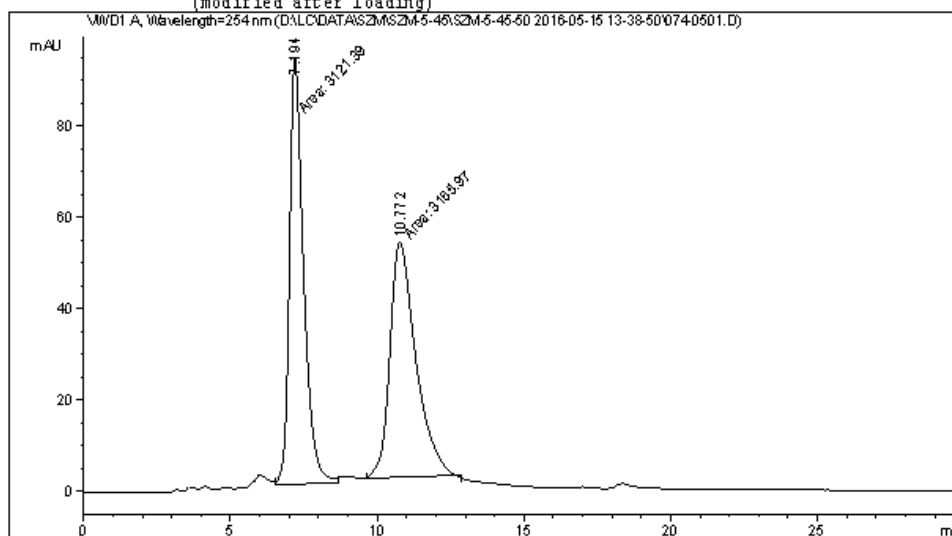

# Area Percent Report

```
=====
Sorted By      : Signal
Multiplier     : 1.0000
Dilution       : 1.0000
Use Multiplier & Dilution Factor with ISTDs
=====
```

Signal 1: VWD1 A, Wavelength=254 nm

| Peak # | RetTime [min] | Type | Width [min] | Area mAU*s | Height [mAU] | Area %  |
|--------|---------------|------|-------------|------------|--------------|---------|
| 1      | 7.194         | MM   | 0.5579      | 3121.38794 | 93.25528     | 49.6454 |
| 2      | 10.772        | MM   | 1.0224      | 3165.97461 | 51.60939     | 50.3546 |

Totals : 6287.36255 144.86467

Data File D:\LC\DATA\SZM\SZM-5-50\SZM-5-50-10 2016-04-05 16-13-27\081-0101.D  
Sample Name: SZM-5-50-10

```
=====
Acq. Operator   : LHC                      Seq. Line :    1
Acq. Instrument : Instrument 1              Location  : Vial 81
Injection Date  : 4/ 5/2016 4:15:15 PM      Inj       :    1
                                           Inj Volume: 5 µl
Acq. Method     : D:\LC\DATA\SZM\SZM-5-50\SZM-5-50-10 2016-04-05 16-13-27\ASH-20-80-IML-
                                           254NM-20MIN.M
Last changed    : 3/28/2016 11:02:44 AM by LHC
Analysis Method : D:\LC\DATA\SZM\SZM-5-50\SZM-5-50-10 2016-04-05 16-13-27\081-0101.D\A.M (
                                           ASH-20-80-IML-254NM-20MIN.M)
Last changed    : 5/14/2016 10:31:43 PM by WZF
                                           (modified after loading)
=====
```

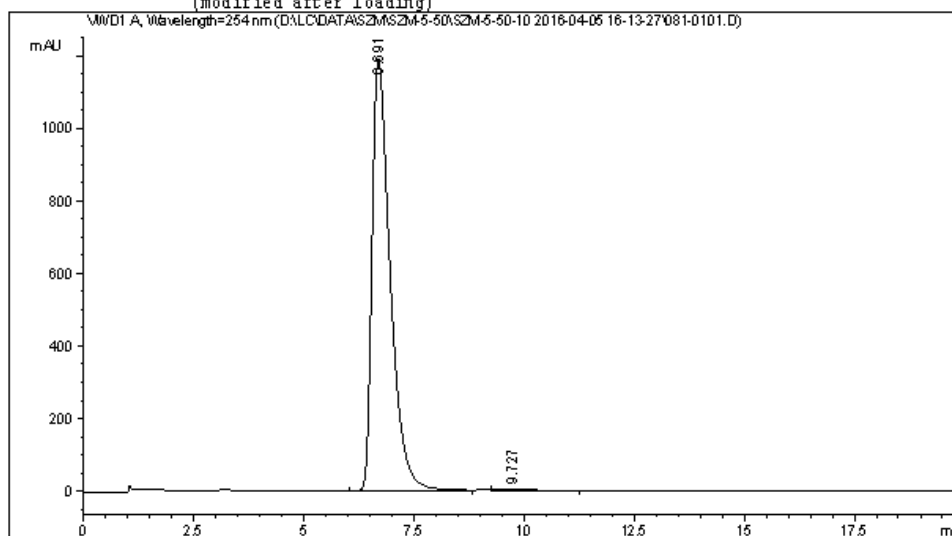

=====  
Area Percent Report  
=====

Sorted By : Signal  
Multiplier : 1.0000  
Dilution : 1.0000  
Use Multiplier & Dilution Factor with ISTDs

Signal 1: VWD1 A, Wavelength=254 nm

| Peak # | RetTime [min] | Type | Width [min] | Area mAU  | Height [mAU] | Area %  |
|--------|---------------|------|-------------|-----------|--------------|---------|
| 1      | 6.691         | BB   | 0.4311      | 3.42152e4 | 1191.64990   | 99.0898 |
| 2      | 9.727         | VB   | 0.6935      | 314.28152 | 6.04935      | 0.9102  |

Totals : 3.45295e4 1197.69926

Instrument 1 5/14/2016 10:31:54 PM WZF

Page 1 of 1

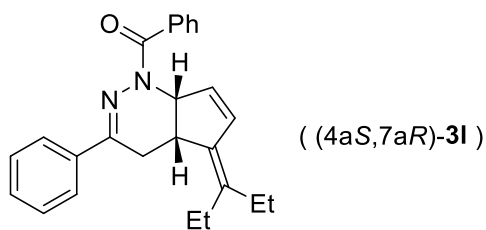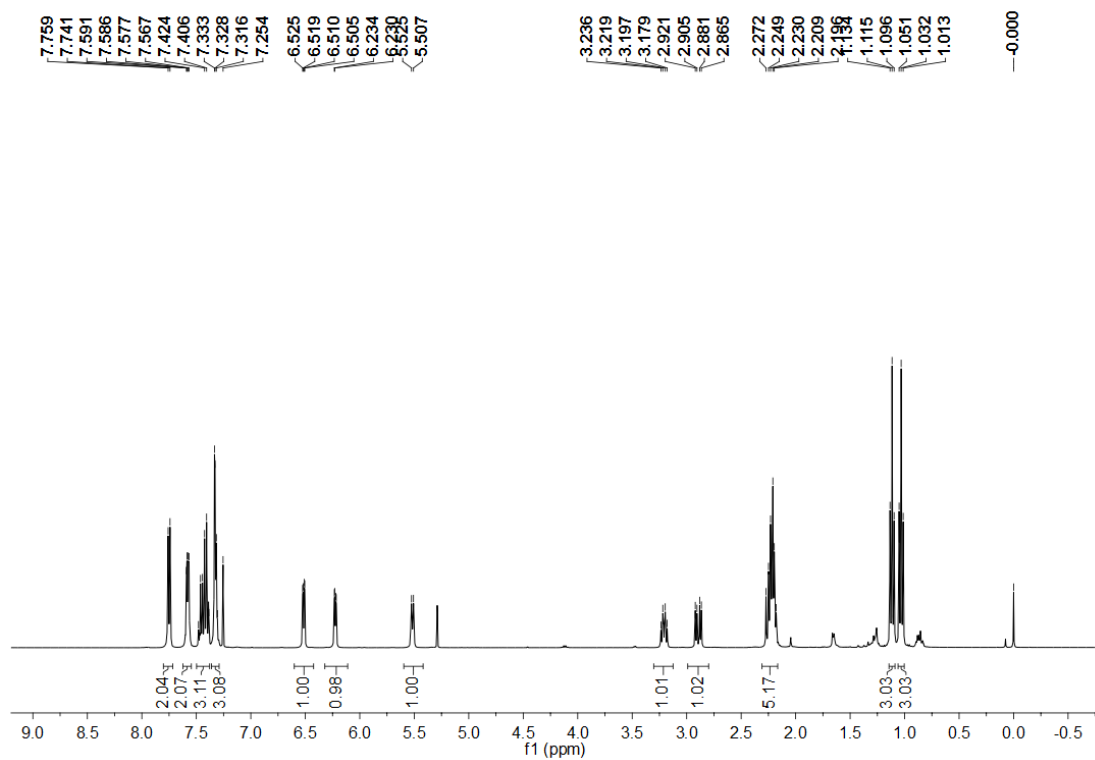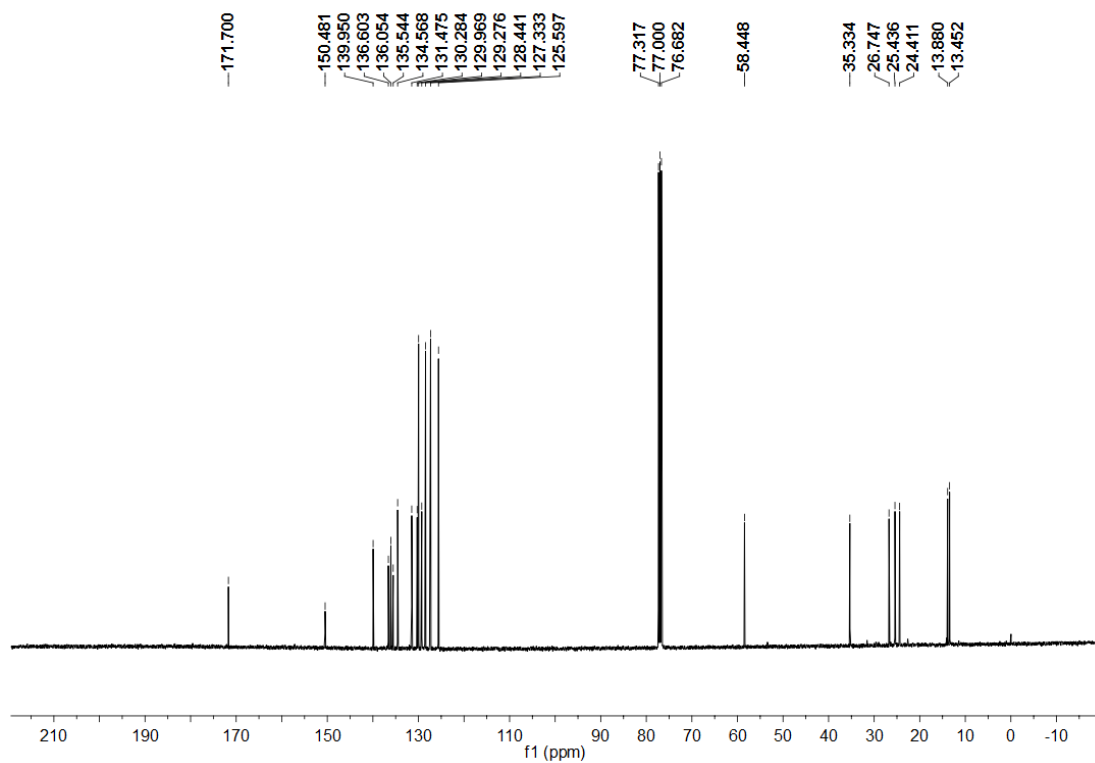



Data File D:\LC\DATA\WL\WL-FULVENE\WL-3-WUTONG-RAC 2016-12-13 09-20-26\054-0101.D  
Sample Name: WL-3-WUTONG-RAC

```
=====
Acq. Operator   : LHC                      Seq. Line :    1
Acq. Instrument : Instrument 1              Location  : Vial 54
Injection Date  : 12/13/2016 9:21:51 AM    Inj       :    1
                                           Inj Volume: 5 µl

Acq. Method     : D:\LC\DATA\WL\WL-FULVENE\WL-3-WUTONG-RAC 2016-12-13 09-20-26\IE-96-4-
                  245NM-30MIN.M
Last changed    : 12/13/2016 9:20:36 AM by LHC
                  (modified after loading)
Analysis Method : D:\LC\DATA\WL\WL-FULVENE\WL-3-WUTONG-RAC 2016-12-13 09-20-26\054-0101.D\
                  DA.M (IE-96-4-245NM-30MIN.M)
Last changed    : 11/20/2017 7:08:40 PM by SXS
                  (modified after loading)
=====
```

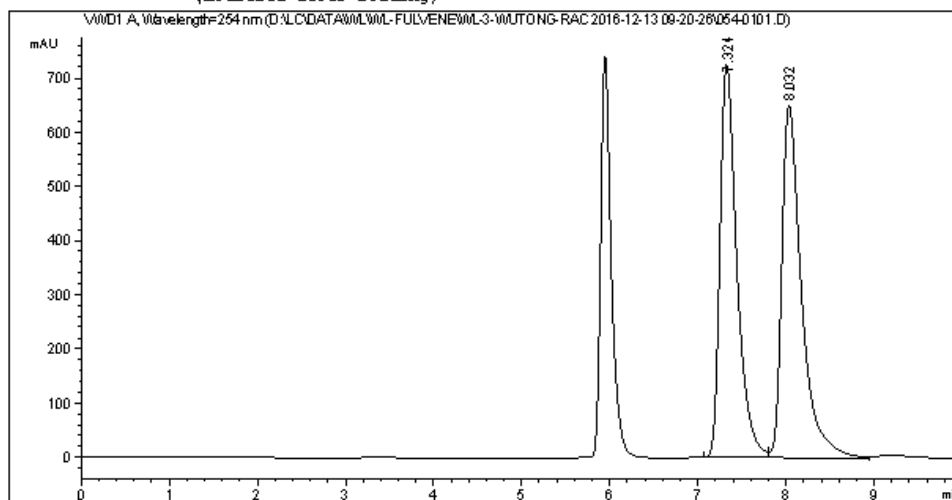

Area Percent Report

```
=====
Sorted By      :      Signal
Multiplier     :      1.0000
Dilution       :      1.0000
Use Multiplier & Dilution Factor with ISTDs
=====
```

Signal 1: VMD1 A, Wavelength=254 nm

| Peak # | RetTime [min] | Type | Width [min] | Area mAU *s | Height [mAU] | Area %  |
|--------|---------------|------|-------------|-------------|--------------|---------|
| 1      | 7.324         | VV   | 0.2006      | 9676.86914  | 726.25989    | 48.8577 |
| 2      | 8.032         | VV   | 0.2327      | 1.01294e4   | 650.27850    | 51.1423 |

Data File D:\LC\DATA\WL\WL-FULVENE\WL-3-WUTONG-OPT 2016-12-13 20-52-49\055-0101.D  
Sample Name: WL-3-WUTONG-OPT

```
=====
Acq. Operator   : LHC                      Seq. Line :    1
Acq. Instrument : Instrument 1              Location  : Vial 55
Injection Date  : 12/13/2016 8:54:21 PM    Inj       :    1
                                           Inj Volume: 5 µl

Acq. Method     : D:\LC\DATA\WL\WL-FULVENE\WL-3-WUTONG-OPT 2016-12-13 20-52-49\IB-96-4-
                  245NM-30MIN.M
Last changed    : 12/13/2016 8:51:29 PM by LHC
Analysis Method : D:\LC\DATA\WL\WL-FULVENE\WL-3-WUTONG-OPT 2016-12-13 20-52-49\055-0101.D\
                  DA.M (IB-96-4-245NM-30MIN.M)
Last changed    : 11/20/2017 7:07:17 PM by SXS
                  (modified after loading)
=====
```

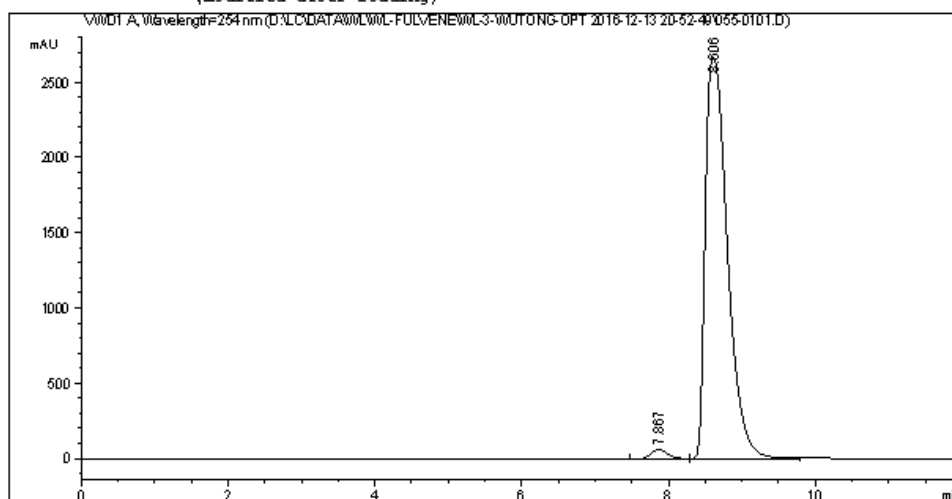

```
=====
                        Area Percent Report
=====
```

```
Sorted By      :      Signal
Multiplier     :      1.0000
Dilution       :      1.0000
Use Multiplier & Dilution Factor with ISTDs
```

Signal 1: VMD1 A, Wavelength=254 nm

| Peak # | RetTime [min] | Type | Width [min] | Area mAU  | Height [mAU] | Area %  |
|--------|---------------|------|-------------|-----------|--------------|---------|
| 1      | 7.867         | VV   | 0.2565      | 988.90131 | 60.42138     | 1.7406  |
| 2      | 8.606         | VV   | 0.3252      | 5.58252e4 | 2672.65942   | 98.2594 |

Totals :                      5.68141e4   2733.08080

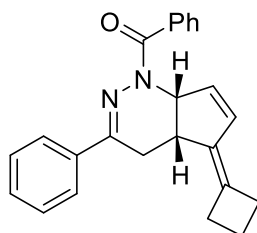

((4aS,7aR)-3m)

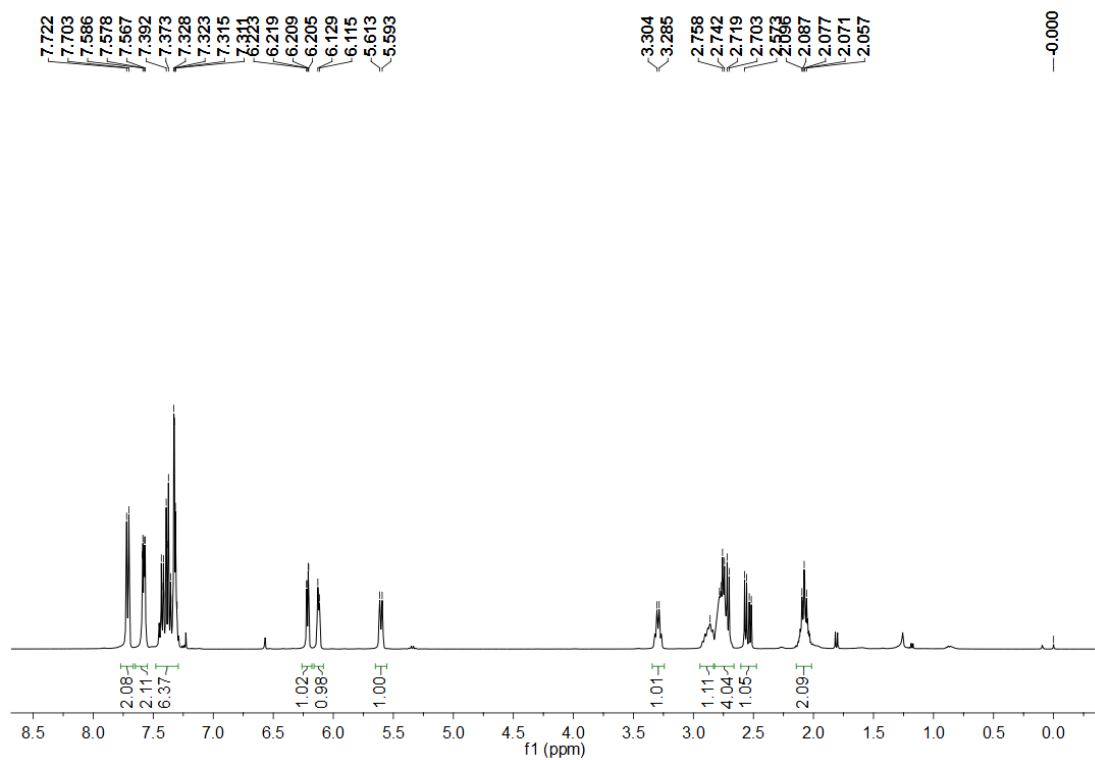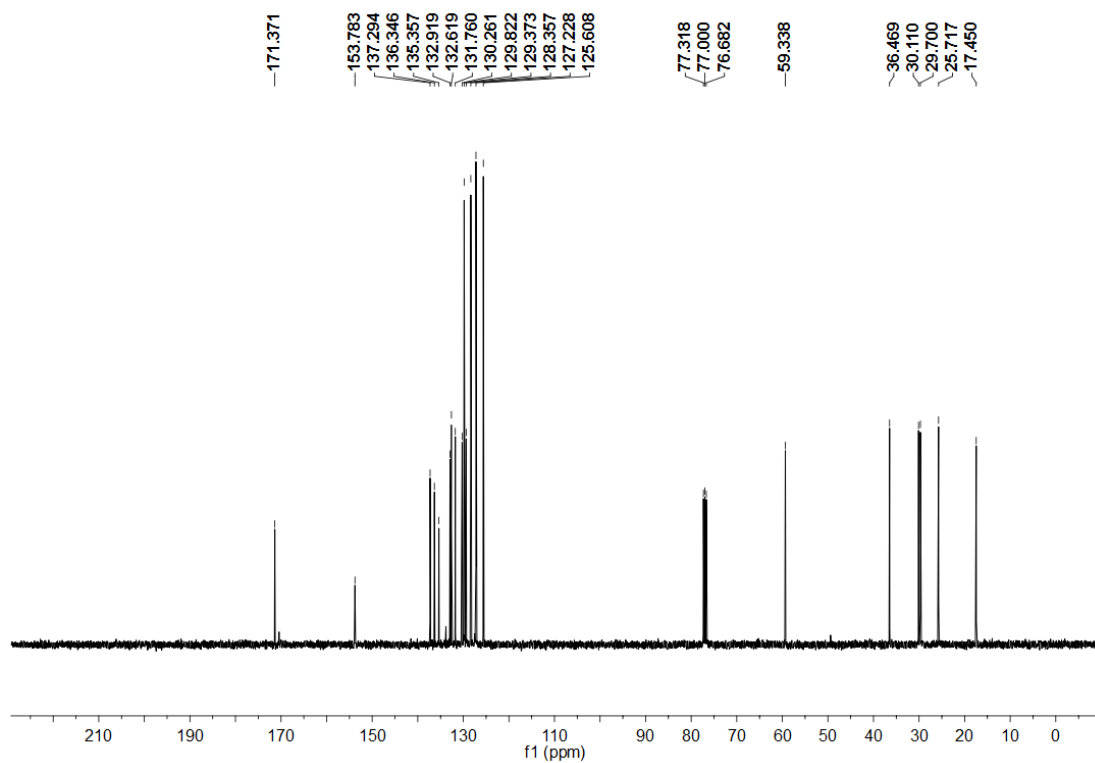

Data File D:\LC\DATA\SZM\SZM-5-59\SZM-5-59-C-D-E 2016-05-03 21-22-36\071-0101.D  
Sample Name: szm-5-59-c

```
=====
Acq. Operator   : WZF                               Seq. Line :    1
Acq. Instrument : Instrument 1                       Location  : Vial 71
Injection Date  : 5/3/2016 9:23:58 PM                Inj       :    1
                                                    Inj Volume: 5 µl
Acq. Method     : D:\LC\DATA\SZM\SZM-5-59\SZM-5-59-C-D-E 2016-05-03 21-22-36\ICH-20-80-1ML-
                  254NM-25MIN.M
Last changed    : 4/28/2016 3:58:30 PM by WZF
Analysis Method : D:\LC\DATA\SZM\SZM-5-59\SZM-5-59-C-D-E 2016-05-03 21-22-36\071-0101.D\DA.M
                  (ICH-20-80-1ML-254NM-25MIN.M)
Last changed    : 5/14/2016 9:56:18 PM by WZF
                  (modified after loading)
=====
```

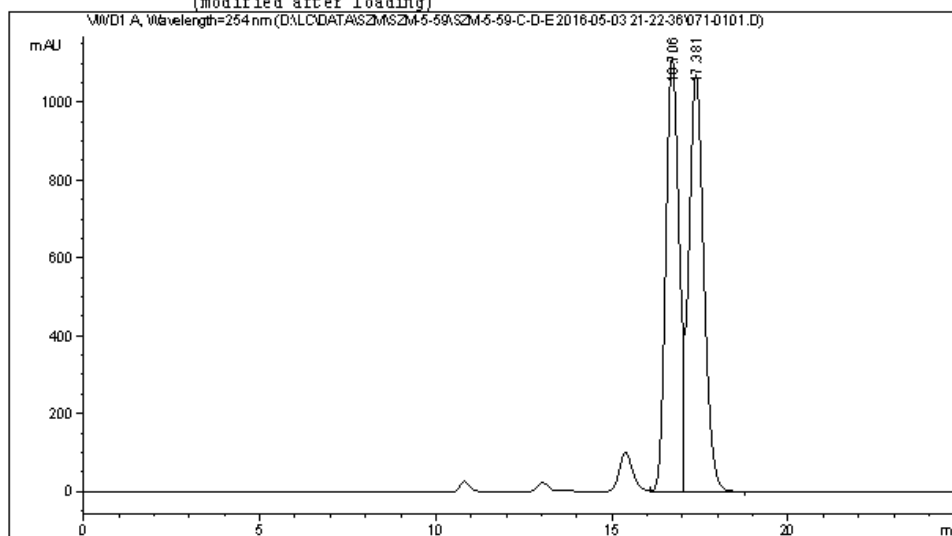

# Area Percent Report

```
=====
Sorted By      : Signal
Multiplier     : 1.0000
Dilution       : 1.0000
Use Multiplier & Dilution Factor with ISTDs
=====
```

Signal 1: VWD1 A, Wavelength=254 nm

| Peak # | RetTime [min] | Type | Width [min] | Area mAU  | Height [mAU] | Area %  |
|--------|---------------|------|-------------|-----------|--------------|---------|
| 1      | 16.706        | WV   | 0.4051      | 2.91916e4 | 1112.79346   | 48.0660 |
| 2      | 17.381        | VB   | 0.4477      | 3.15408e4 | 1068.72375   | 51.9340 |

Totals : 6.07325e4 2181.51721

Instrument 1 5/14/2016 9:56:23 PM WZF

Page 1 of 1

Data File D:\LC\DATA\SZM\SZM-5-60\SZM-5-60-A-B-C 2016-04-28 16-57-35\083-0301.D  
Sample Name: SZM-5-60-C

```
=====
Acq. Operator   : WZF                               Seq. Line :    3
Acq. Instrument : Instrument 1                       Location  : Vial 83
Injection Date  : 4/28/2016 5:51:42 PM              Inj       :    1
                                                    Inj Volume: 5 µl
Acq. Method     : D:\LC\DATA\SZM\SZM-5-60\SZM-5-60-A-B-C 2016-04-28 16-57-35\ICH-20-80-1ML-
                  254NM-25MIN.M
Last changed    : 4/28/2016 3:58:30 PM by WZF
Analysis Method : D:\LC\DATA\SZM\SZM-5-60\SZM-5-60-A-B-C 2016-04-28 16-57-35\083-0301.D\DA.M
                  (ICH-20-80-1ML-254NM-25MIN.M)
Last changed    : 5/14/2016 9:49:28 PM by WZF
                  (modified after loading)
=====
```

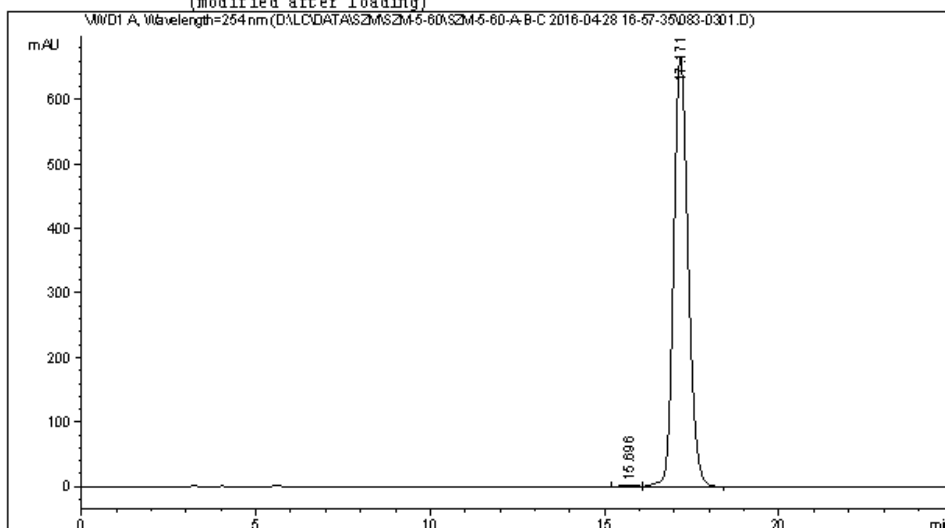

# Area Percent Report

```
Sorted By      : Signal
Multiplier     : 1.0000
Dilution       : 1.0000
Use Multiplier & Dilution Factor with ISTDs
```

Signal 1: VMD1 A, Wavelength=254 nm

| Peak # | RetTime [min] | Type | Width [min] | Area mAU *s | Height [mAU] | Area %  |
|--------|---------------|------|-------------|-------------|--------------|---------|
| 1      | 15.696        | BV   | 0.3486      | 71.94296    | 2.86219      | 0.3734  |
| 2      | 17.171        | VB   | 0.4459      | 1.91947e4   | 665.17780    | 99.6266 |

Totals : 1.92666e4 668.03999

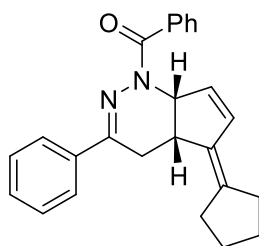

( (4a*S*,7a*R*)-**3n** )

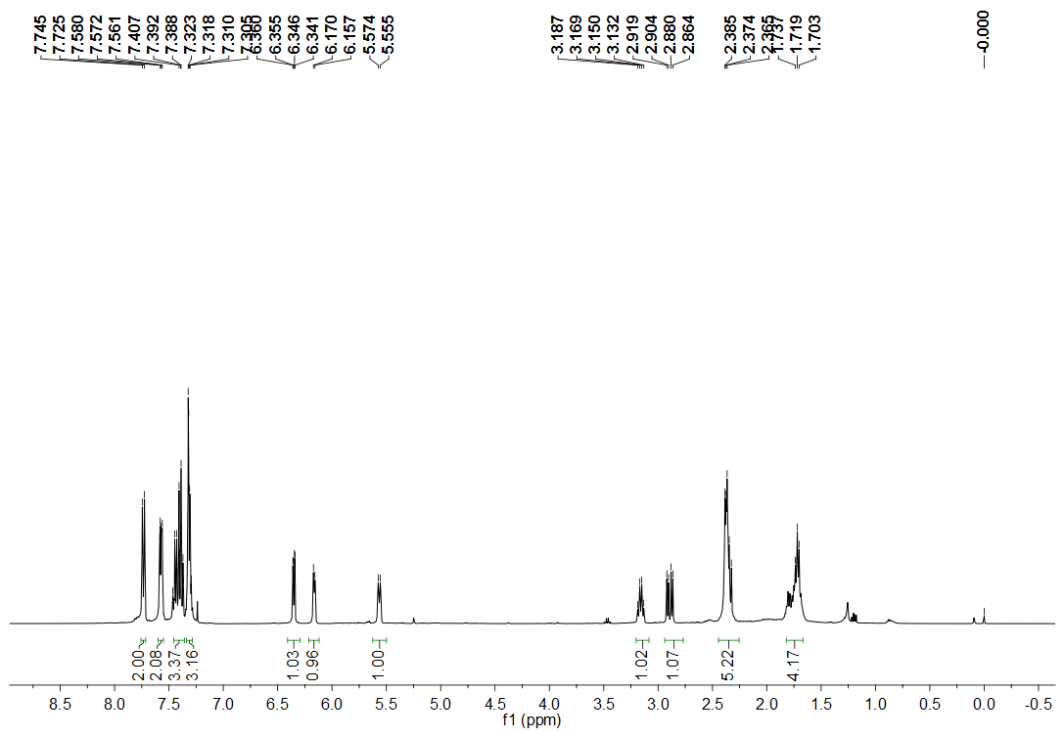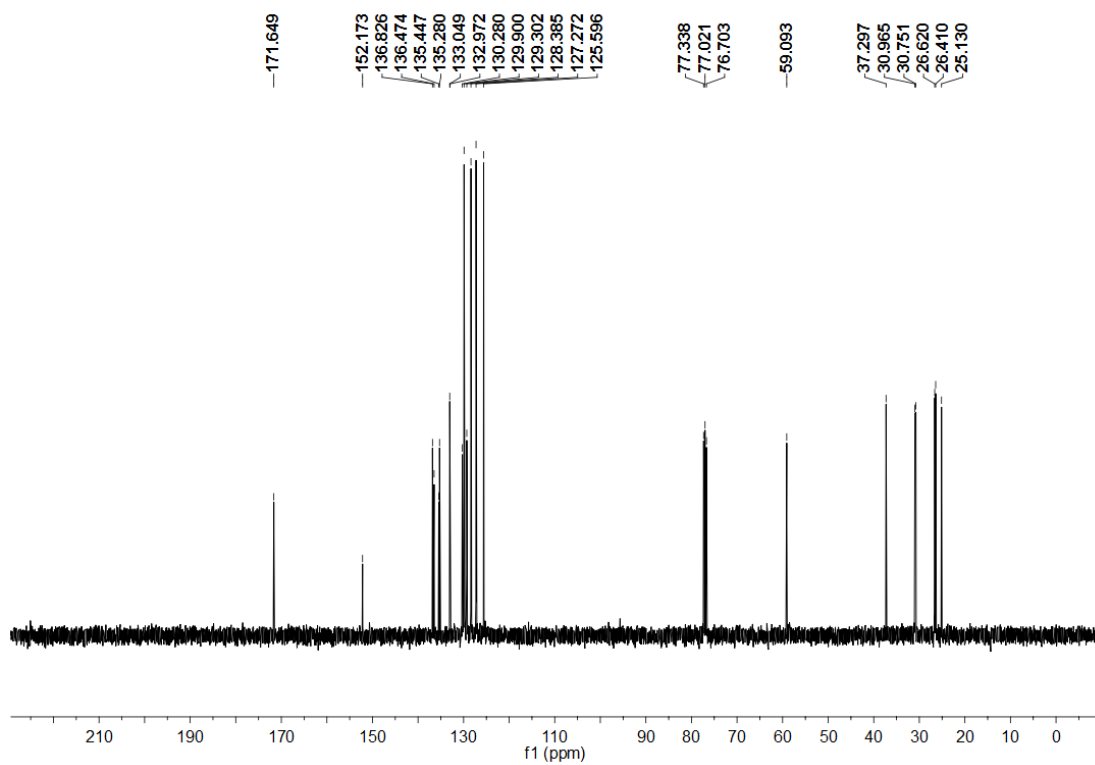

Data File D:\LC\DATA\SZM\SZM-5-59\SZM-5-59-A-B 2016-04-28 15-59-04\081-0101.D  
Sample Name: SZM-5-59-A

```
=====
Acq. Operator   : WZF                               Seq. Line :    1
Acq. Instrument : Instrument 1                       Location  : Vial 81
Injection Date  : 4/28/2016 4:00:29 PM              Inj       :    1
                                                    Inj Volume: 5 µl

Acq. Method     : D:\LC\DATA\SZM\SZM-5-59\SZM-5-59-A-B 2016-04-28 15-59-04\ICH-20-80-1ML-
254NM-25MIN.M
Last changed    : 4/28/2016 3:58:30 PM by WZF
Analysis Method : D:\LC\DATA\SZM\SZM-5-59\SZM-5-59-A-B 2016-04-28 15-59-04\081-0101.D\DA.M (
ICH-20-80-1ML-254NM-25MIN.M)
Last changed    : 5/14/2016 9:53:29 PM by WZF
(modified after loading)
=====
```

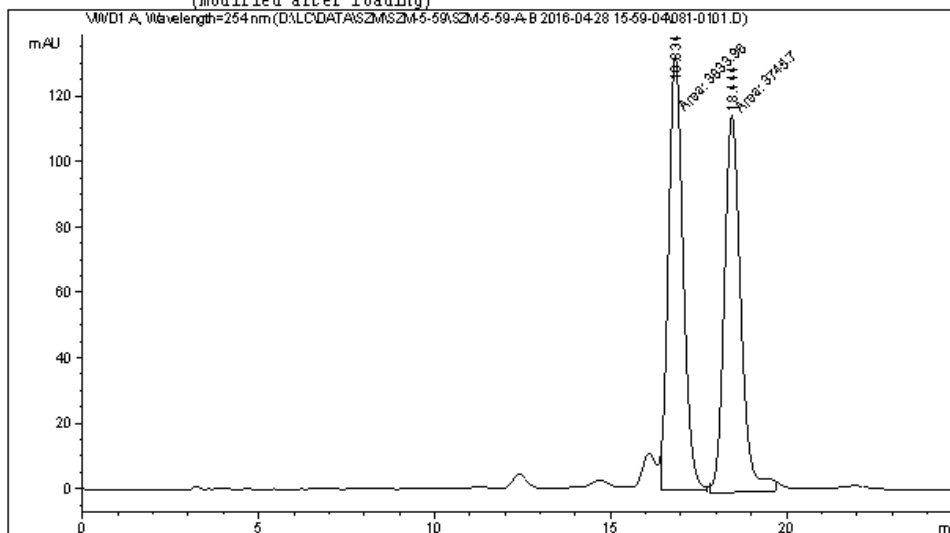

# Area Percent Report

```
=====
Sorted By      : Signal
Multiplier     : 1.0000
Dilution       : 1.0000
Use Multiplier & Dilution Factor with ISTDs
=====
```

Signal 1: VMD1 A, Wavelength=254 nm

| Peak # | RetTime [min] | Type | Width [min] | Area mAU   | Height [mAU] | Area %  |
|--------|---------------|------|-------------|------------|--------------|---------|
| 1      | 16.834        | MM   | 0.4818      | 3833.96387 | 132.62325    | 50.5822 |
| 2      | 18.444        | MM   | 0.5433      | 3745.70020 | 114.90802    | 49.4178 |

Totals : 7579.66406 247.53127

Instrument 1 5/14/2016 9:53:33 PM WZF

Page 1 of 1

Data File D:\LC\DATA\SZM\SZM-5-60\SZM-5-60-A-B-C 2016-04-28 16-57-35\081-0101.D  
Sample Name: SZM-5-60-A

```
=====
Acq. Operator   : WZF                               Seq. Line :    1
Acq. Instrument : Instrument 1                       Location  : Vial 81
Injection Date  : 4/28/2016 4:58:47 PM              Inj       :    1
                                                    Inj Volume: 5 µl
Acq. Method     : D:\LC\DATA\SZM\SZM-5-60\SZM-5-60-A-B-C 2016-04-28 16-57-35\ICH-20-80-IML-
254NM-25MIN.M
Last changed    : 4/28/2016 3:58:30 PM by WZF
Analysis Method : D:\LC\DATA\SZM\SZM-5-60\SZM-5-60-A-B-C 2016-04-28 16-57-35\081-0101.D\DA.M
(ICH-20-80-IML-254NM-25MIN.M)
Last changed    : 5/14/2016 9:45:09 PM by WZF
(modified after loading)
=====
```

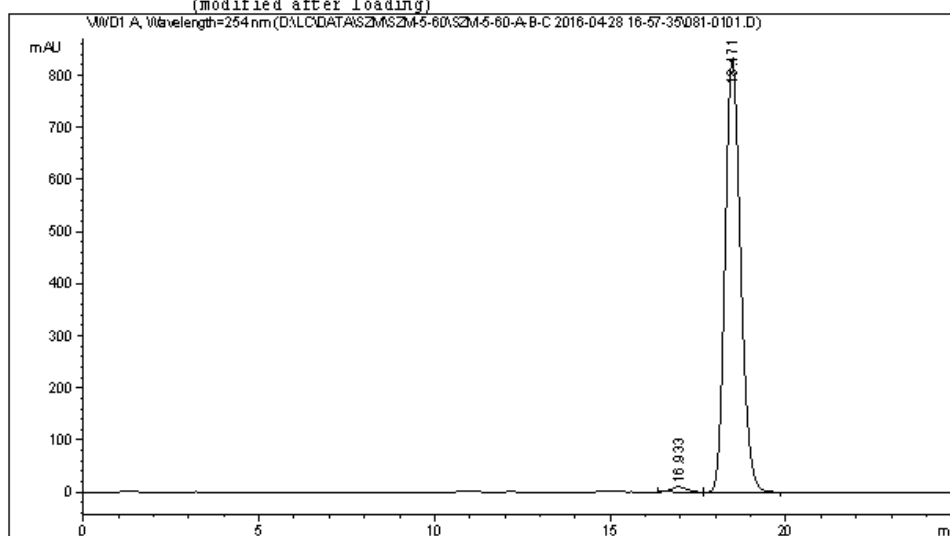

# Area Percent Report

```
=====
Sorted By      : Signal
Multiplier     : 1.0000
Dilution       : 1.0000
Use Multiplier & Dilution Factor with ISTDs
=====
```

Signal 1: VMD1 A, Wavelength=254 nm

| Peak # | RetTime [min] | Type | Width [min] | Area mAU  | Area *s | Height [mAU] | Area %  |
|--------|---------------|------|-------------|-----------|---------|--------------|---------|
| 1      | 16.933        | BV   | 0.4450      | 286.03668 |         | 9.56381      | 1.1036  |
| 2      | 18.471        | VB   | 0.4790      | 2.56322e4 |         | 828.27850    | 98.8964 |

Totals : 2.59183e4 837.84231

Instrument 1 5/14/2016 9:45:15 PM WZF

Page 1 of 1



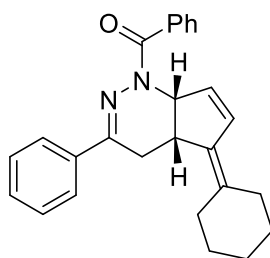

( (4a*S*,7a*R*)-**3o** )

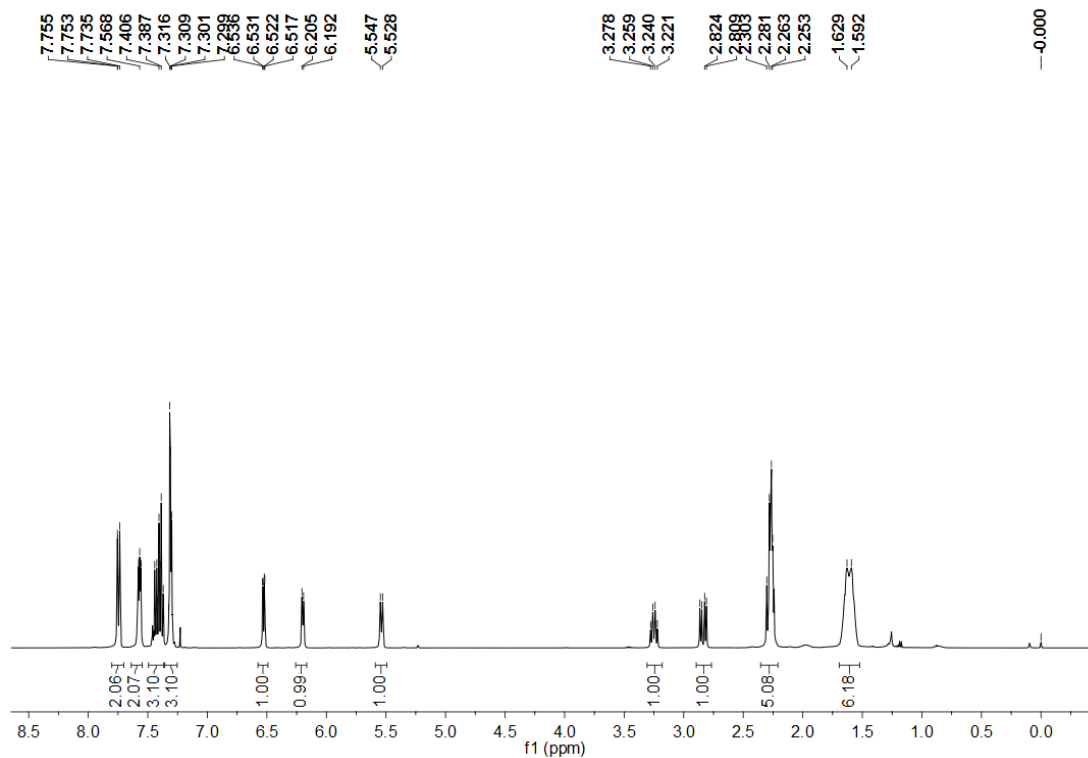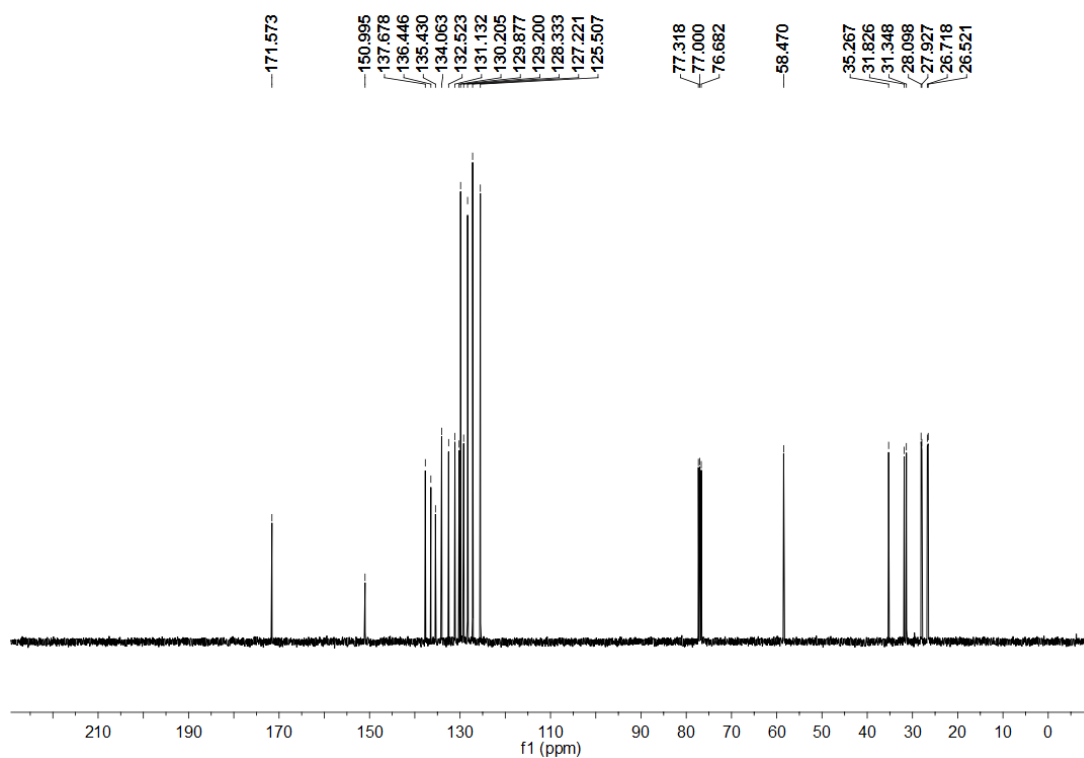

Data File D:\LC\DATA\SZM\SZM-5-59\SZM-5-59-A-B 2016-04-28 15-59-04\082-0201.D  
Sample Name: SZM-5-59-B

```
=====
Acq. Operator   : WZF                      Seq. Line :    2
Acq. Instrument : Instrument 1              Location  : Vial 82
Injection Date  : 4/28/2016 4:26:47 PM      Inj       :    1
                                           Inj Volume: 5 µl
Acq. Method     : D:\LC\DATA\SZM\SZM-5-59\SZM-5-59-A-B 2016-04-28 15-59-04\ICH-20-80-1ML-
                                           254NM-25MIN.M
Last changed    : 4/28/2016 3:58:30 PM by WZF
Analysis Method : D:\LC\DATA\SZM\SZM-5-59\SZM-5-59-A-B 2016-04-28 15-59-04\082-0201.D\DA.M (
                                           ICH-20-80-1ML-254NM-25MIN.M)
Last changed    : 5/14/2016 9:54:57 PM by WZF
                                           (modified after loading)
=====
```

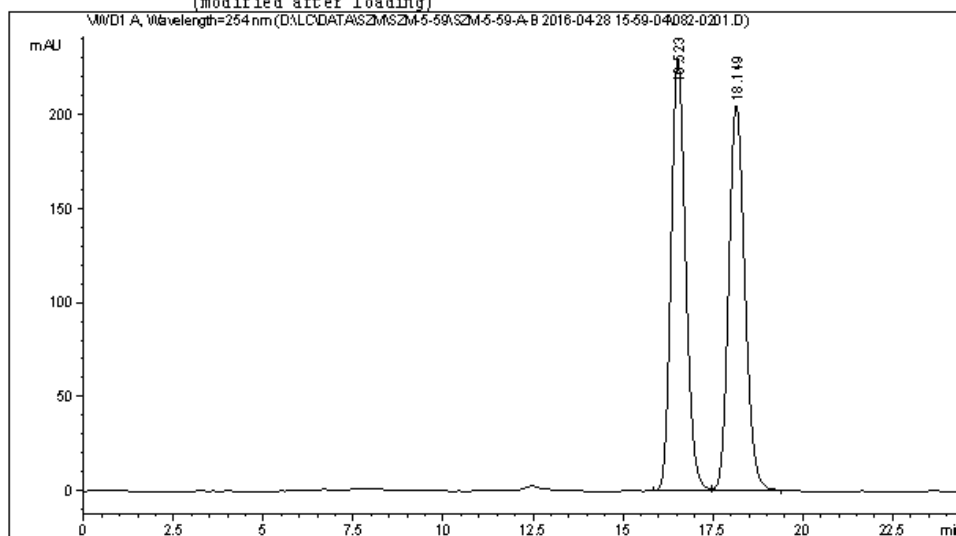

=====  
Area Percent Report  
=====

Sorted By : Signal  
Multiplier : 1.0000  
Dilution : 1.0000  
Use Multiplier & Dilution Factor with ISTDs

Signal 1: VWD1 A, Wavelength=254 nm

| Peak # | RetTime [min] | Type | Width [min] | Area mAU *s | Height [mAU] | Area %  |
|--------|---------------|------|-------------|-------------|--------------|---------|
| 1      | 16.523        | BV   | 0.4347      | 6473.54395  | 229.95941    | 50.2671 |
| 2      | 18.149        | VB   | 0.4829      | 6404.75293  | 204.73796    | 49.7329 |

Totals : 1.28783e4 434.69737

Instrument 1 5/14/2016 9:55:01 PM WZF

Page 1 of 1

Data File D:\LC\DATA\SZM\SZM-5-60\SZM-5-60-A-B-C 2016-04-28 16-57-35\082-0201.D  
Sample Name: SZM-5-60-B

```
=====
Acq. Operator   : WZF                      Seq. Line :    2
Acq. Instrument : Instrument 1              Location  : Vial 82
Injection Date  : 4/28/2016 5:25:31 PM      Inj       :    1
                                           Inj Volume: 5 µl
Acq. Method     : D:\LC\DATA\SZM\SZM-5-60\SZM-5-60-A-B-C 2016-04-28 16-57-35\ICH-20-80-1ML-
254NM-25MIN.M
Last changed    : 4/28/2016 3:58:30 PM by WZF
Analysis Method : D:\LC\DATA\SZM\SZM-5-60\SZM-5-60-A-B-C 2016-04-28 16-57-35\082-0201.D\DA.M
(ICH-20-80-1ML-254NM-25MIN.M)
Last changed    : 5/14/2016 9:48:44 PM by WZF
(modified after loading)
=====
```

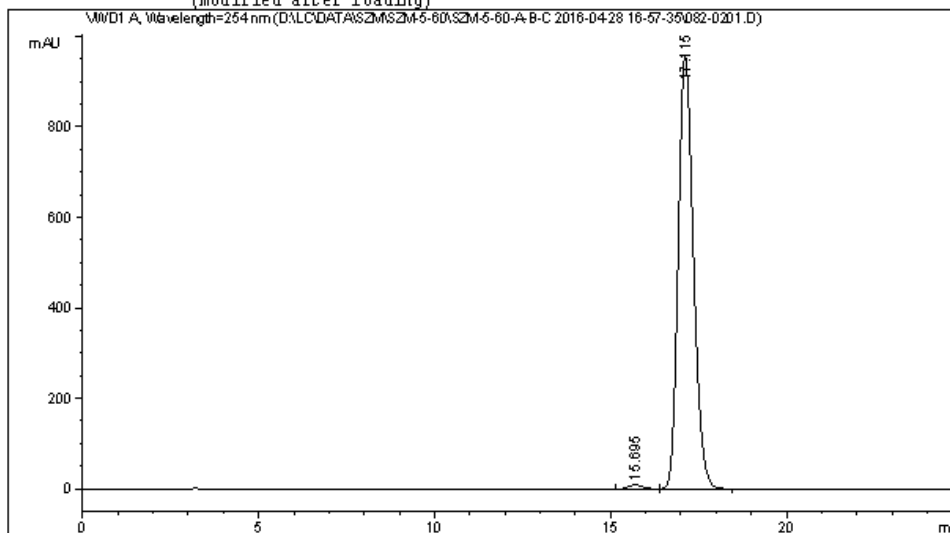

# Area Percent Report

```
Sorted By      : Signal
Multiplier     : 1.0000
Dilution       : 1.0000
Use Multiplier & Dilution Factor with ISTDs
```

Signal 1: VMD1 A, Wavelength=254 nm

| Peak # | RetTime [min] | Type | Width [min] | Area mAU  | Area *s | Height [mAU] | Area %  |
|--------|---------------|------|-------------|-----------|---------|--------------|---------|
| 1      | 15.695        | BV   | 0.4133      | 256.11285 |         | 9.55233      | 0.8846  |
| 2      | 17.115        | VB   | 0.4636      | 2.86958e4 |         | 956.46973    | 99.1154 |

Totals : 2.89520e4 966.02205

Instrument 1 5/14/2016 9:48:48 PM WZF

Page 1 of 1

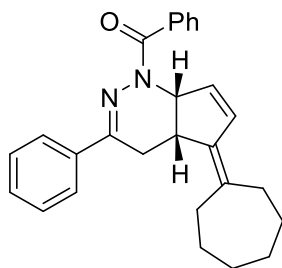

( (4a*S*,7a*R*)-**3p** )

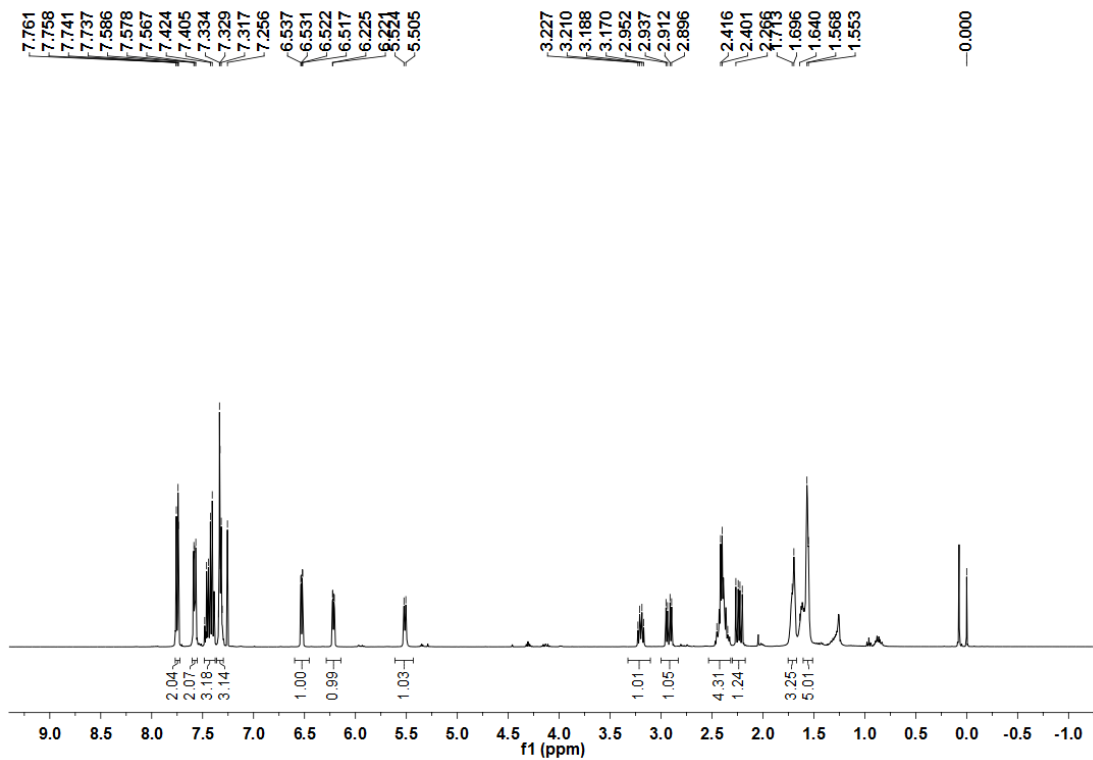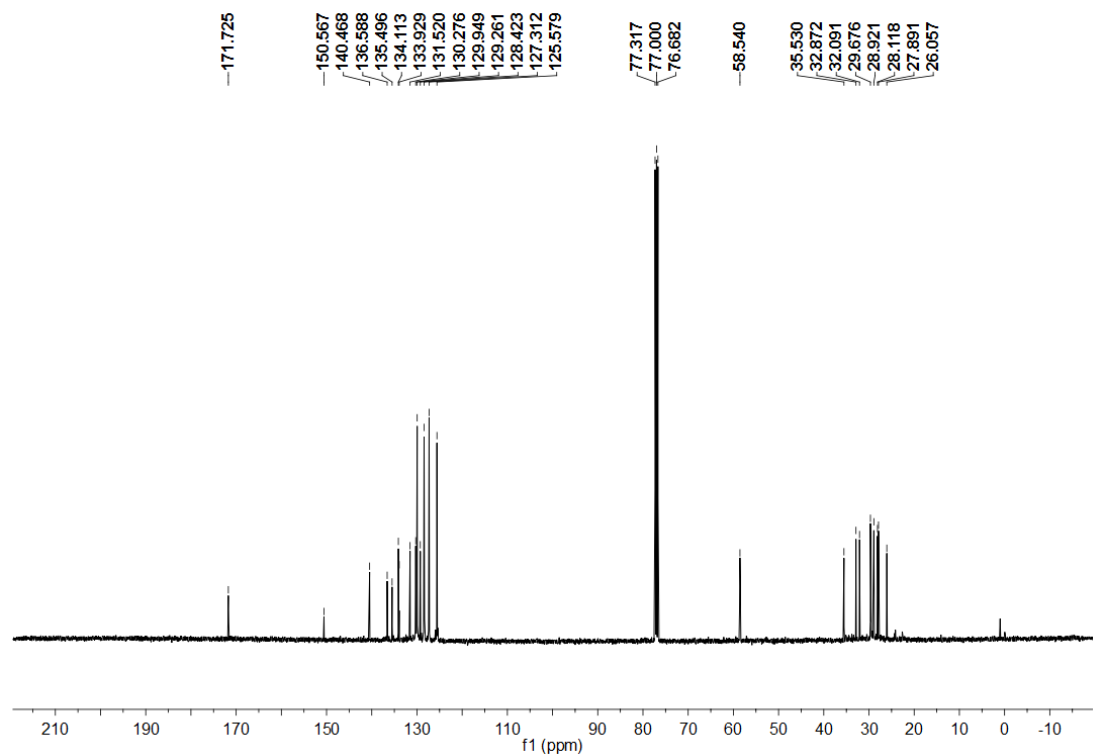

Data File D:\LC\DATA\WL\FULVENE\FULVENE-2 2016-11-16 20-06-10\041-0101.D  
Sample Name: WL-Heptane

```
=====
Acq. Operator   : LHC                      Seq. Line :    1
Acq. Instrument : Instrument 1              Location  : Vial 41
Injection Date  : 11/16/2016 8:07:31 PM    Inj       :    1
                                           Inj Volume: 5 µl
Acq. Method     : D:\LC\DATA\WL\FULVENE\FULVENE-2 2016-11-16 20-06-10\IE-80-20-30MIN-
                                           245NM.M
Last changed    : 11/16/2016 8:05:10 PM by LHC
Analysis Method : D:\LC\DATA\WL\FULVENE\FULVENE-2 2016-11-16 20-06-10\041-0101.D\DA.M
                                           (IE-80-20-30MIN-245NM.M)
Last changed    : 11/20/2017 7:10:12 PM by SXS
                                           (modified after loading)
=====
```

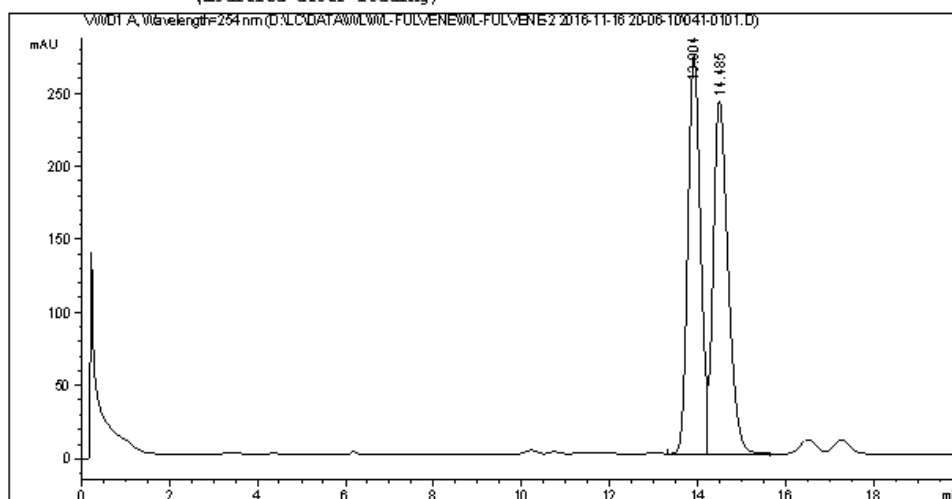

```
=====
                          Area Percent Report
=====
```

```
Sorted By      :      Signal
Multiplier     :      1.0000
Dilution       :      1.0000
Use Multiplier & Dilution Factor with ISTDs
```

Signal 1: VMD1 A, Wavelength=254 nm

| Peak # | RetTime [min] | Type | Width [min] | Area mAU   | Height [mAU] | Area %  |
|--------|---------------|------|-------------|------------|--------------|---------|
| 1      | 13.904        | VV   | 0.3109      | 5407.17432 | 271.58078    | 48.9699 |
| 2      | 14.485        | VB   | 0.3556      | 5634.65967 | 241.16479    | 51.0301 |

Totals : 1.10418e4 512.74557

Instrument 1 11/20/2017 7:10:15 PM SXS

Page 1 of 2

Data File D:\LC\DATA\WL\WL-FULVENE\WL-OPT 2016-11-17 15-03-41\045-0101.D  
Sample Name: wl-heptane

```
=====
Acq. Operator   : HR                      Seq. Line :    1
Acq. Instrument : Instrument 1             Location  : Vial 45
Injection Date  : 11/17/2016 3:04:59 PM    Inj       :    1
                                           Inj Volume: 5 µl
Acq. Method     : D:\LC\DATA\WL\WL-FULVENE\WL-OPT 2016-11-17 15-03-41\IE-80-20-30MIN-245NM.
                                           M
Last changed    : 11/16/2016 8:05:10 PM by LHC
Analysis Method : D:\LC\DATA\WL\WL-FULVENE\WL-OPT 2016-11-17 15-03-41\045-0101.D\DA.M (IE-
                                           80-20-30MIN-245NM.M)
Last changed    : 11/20/2017 7:11:36 PM by SXS
                                           (modified after loading)
=====
```

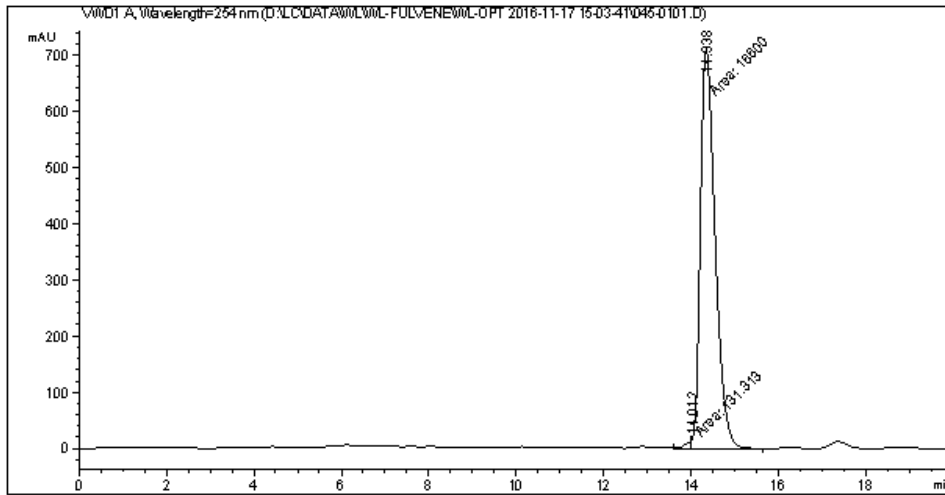

Area Percent Report

```
Sorted By      : Signal
Multiplier     : 1.0000
Dilution       : 1.0000
Use Multiplier & Dilution Factor with ISTDs
```

Signal 1: VMD1 A, Wavelength=254 nm

| Peak # | RetTime [min] | Type | Width [min] | Area mAU *s | Height [mAU] | Area %  |
|--------|---------------|------|-------------|-------------|--------------|---------|
| 1      | 14.012        | MF   | 0.1486      | 131.31300   | 14.72354     | 0.7848  |
| 2      | 14.338        | FM   | 0.3903      | 1.66000e4   | 708.83008    | 99.2152 |

Totals : 1.67313e4 723.55361

Instrument 1 11/20/2017 7:11:40 PM SXS

Page 1 of 2

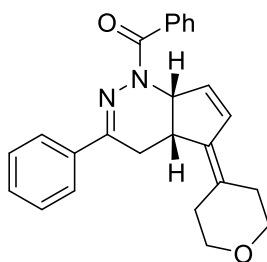

((4a*S*,7a*R*)-**3q**)

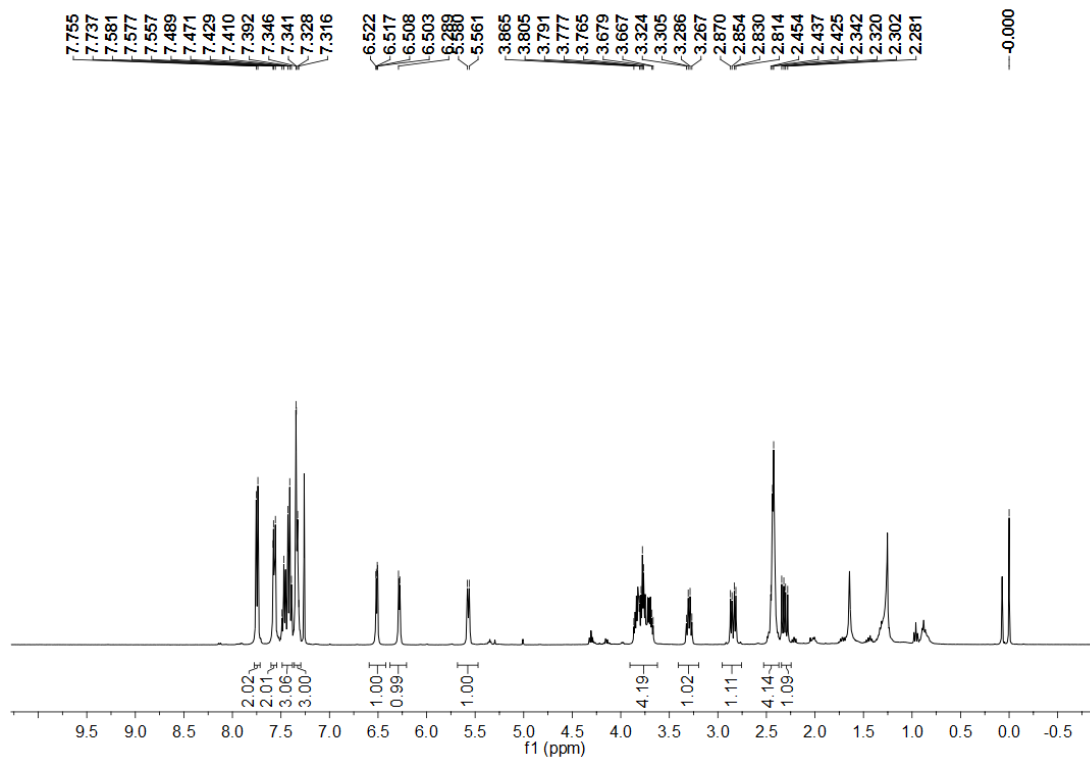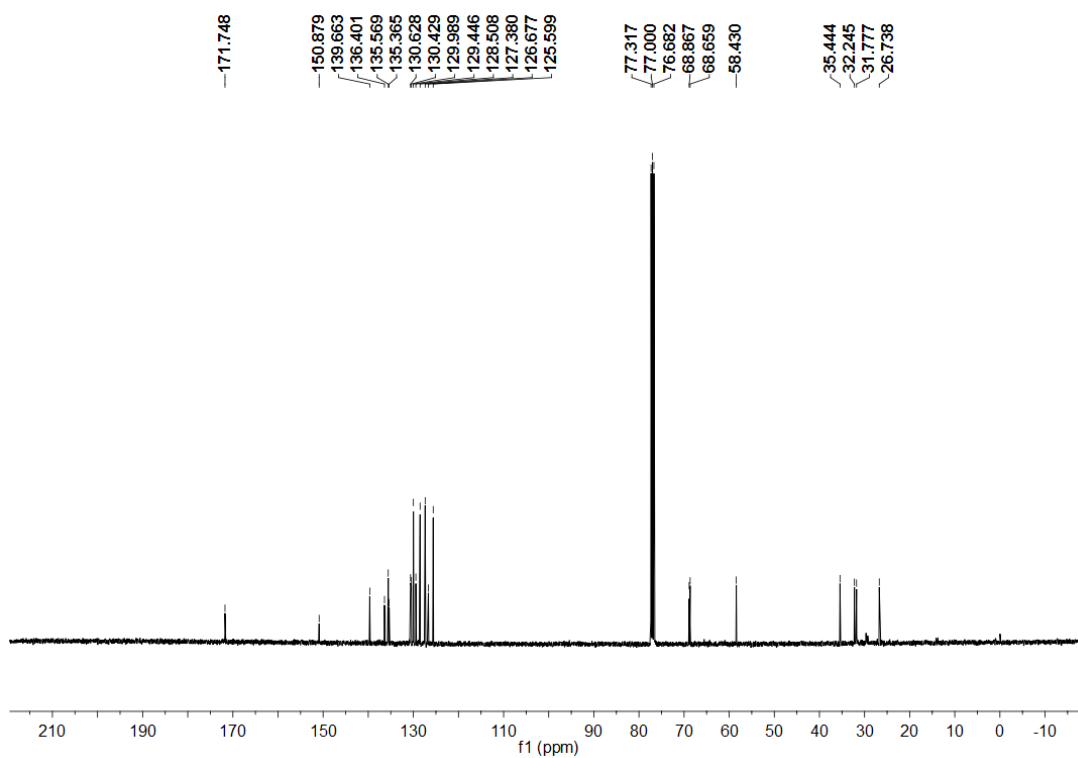

Data File D:\LC\DATA\WL\WL-FULVENE\PYRAN 2016-12-01 10-37-33\041-0101.D  
Sample Name: pyran-rac

```
=====
Acq. Operator   : LHC                      Seq. Line :    1
Acq. Instrument : Instrument 1              Location  : Vial 41
Injection Date  : 12/1/2016 10:38:41 AM     Inj       :    1
                                           Inj Volume: 5 µl

Acq. Method     : D:\LC\DATA\WL\WL-FULVENE\PYRAN 2016-12-01 10-37-33\IE-70-30-30MIN-254NM.M
Last changed    : 11/17/2016 3:01:35 PM by HR
Analysis Method : D:\LC\DATA\WL\WL-FULVENE\PYRAN 2016-12-01 10-37-33\041-0101.D\DA.M (IE-
70-30-30MIN-254NM.M)
Last changed    : 11/20/2017 6:57:56 PM by SXS
(modified after loading)
```

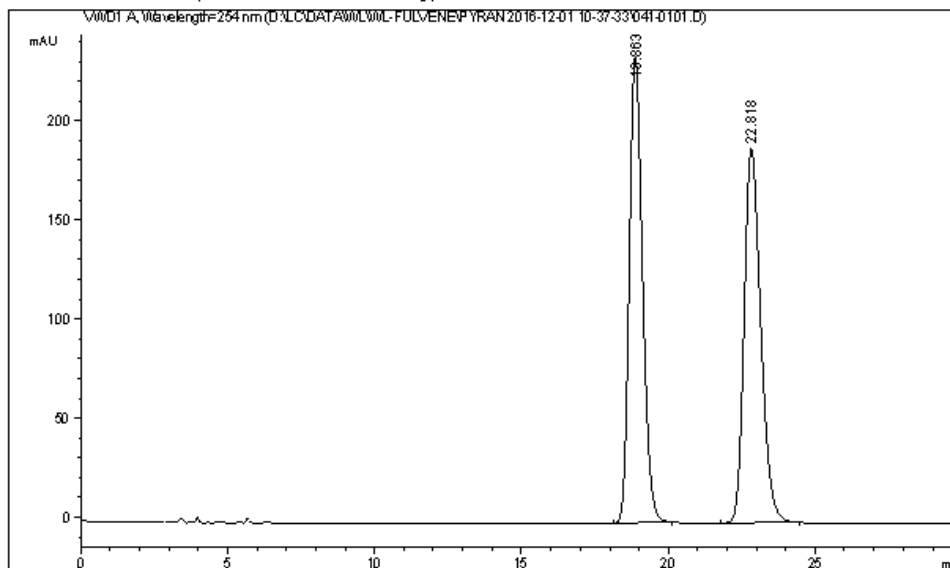

=====  
Area Percent Report  
=====

Sorted By : Signal  
Multiplier : 1.0000  
Dilution : 1.0000  
Use Multiplier & Dilution Factor with ISTDs

Signal 1: VMD1 A, Wavelength=254 nm

| Peak # | RetTime [min] | Type | Width [min] | Area mAU   | Height [mAU] | Area %  |
|--------|---------------|------|-------------|------------|--------------|---------|
| 1      | 18.863        | BB   | 0.4838      | 7371.16406 | 235.03664    | 49.8493 |
| 2      | 22.818        | BB   | 0.5980      | 7415.71777 | 188.81071    | 50.1507 |

Instrument 1 11/20/2017 6:57:59 PM SXS

Page 1 of 2



Data File D:\LC\DATA\WL\WL-FULVENE\PYRAN 2016-12-01 10-37-33\042-0201.D  
Sample Name: pyran-opt

```
=====
Acq. Operator   : LHC                      Seq. Line :    2
Acq. Instrument : Instrument 1              Location  : Vial 42
Injection Date  : 12/1/2016 11:10:06 AM     Inj       :    1
                                           Inj Volume: 5 µl

Acq. Method     : D:\LC\DATA\WL\WL-FULVENE\PYRAN 2016-12-01 10-37-33\IE-70-30-30MIN-254NM.M
Last changed    : 11/17/2016 3:01:35 PM by HR
Analysis Method : D:\LC\DATA\WL\WL-FULVENE\PYRAN 2016-12-01 10-37-33\042-0201.D\DA.M (IE-
70-30-30MIN-254NM.M)
Last changed    : 11/20/2017 6:58:26 PM by SXS
                (modified after loading)
=====
```

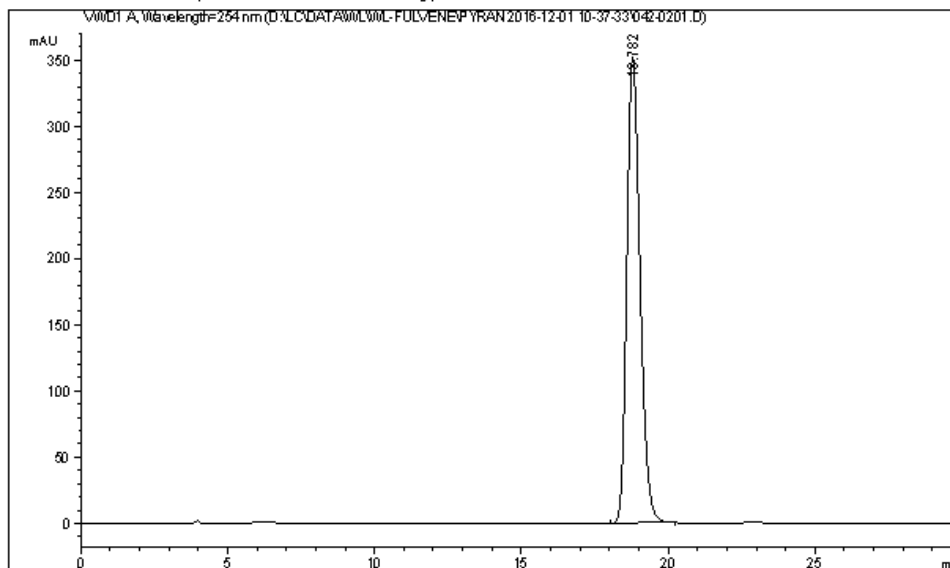

=====  
Area Percent Report  
=====

```
Sorted By      :      Signal
Multiplier     :      1.0000
Dilution       :      1.0000
Use Multiplier & Dilution Factor with ISTDs
```

Signal 1: VMD1 A, Wavelength=254 nm

| Peak # | RetTime [min] | Type | Width [min] | Area mAU  | Height [mAU] | Area %   |
|--------|---------------|------|-------------|-----------|--------------|----------|
| 1      | 18.782        | BB   | 0.4854      | 1.10444e4 | 352.02325    | 100.0000 |

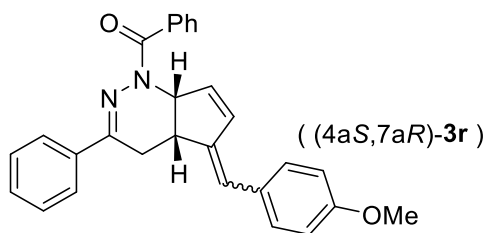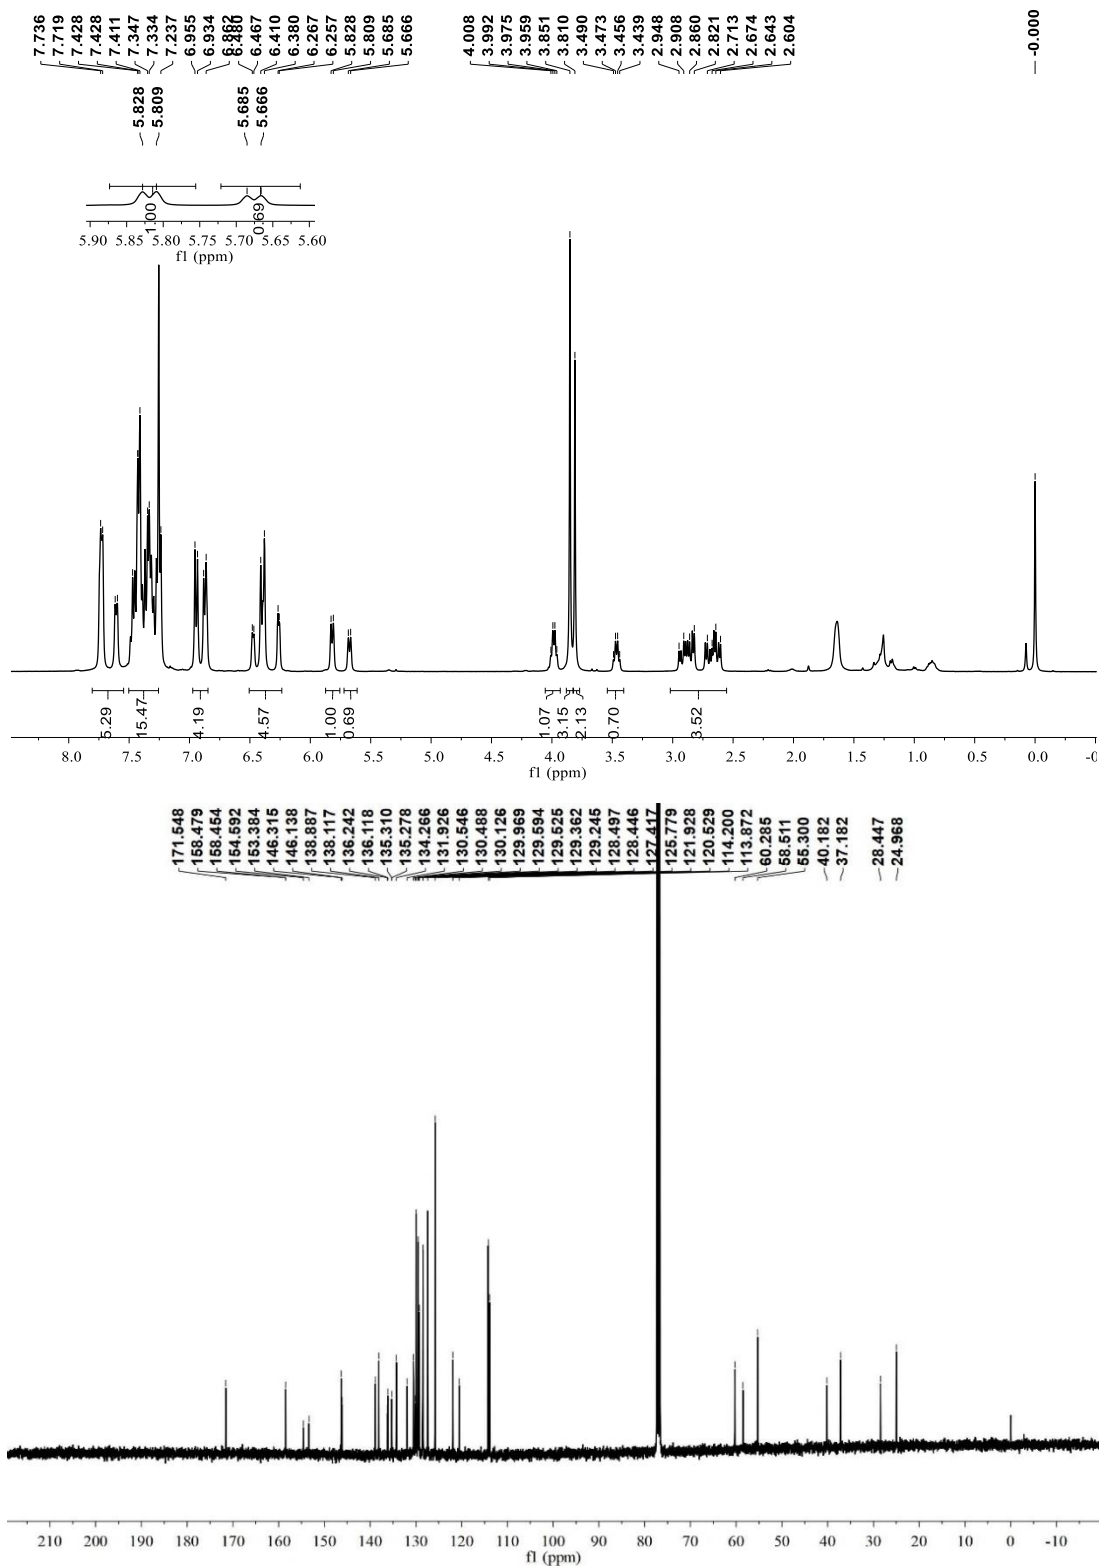

Data File D:\LC\DATA\WL\FULVENE\WL-P-OME-RAC 2016-12-10 16-35-47\051-0101.D  
Sample Name: WL-p-OME-RAC

```
=====
Acq. Operator   : LHC                      Seq. Line :    1
Acq. Instrument : Instrument 1              Location  : Vial 51
Injection Date  : 12/10/2016 4:36:58 PM    Inj       :    1
                                           Inj Volume: 5 µl

Acq. Method     : D:\LC\DATA\WL\FULVENE\WL-P-OME-RAC 2016-12-10 16-35-47\AS-75-25-40MIN-
                  245NM.M
Last changed    : 12/10/2016 4:35:56 PM by LHC
                  (modified after loading)
Analysis Method : D:\LC\DATA\WL\FULVENE\WL-P-OME-RAC 2016-12-10 16-35-47\051-0101.D\DA.M
                  (AS-75-25-40MIN-245NM.M)
Last changed    : 11/20/2017 7:13:52 PM by SXS
                  (modified after loading)
=====
```

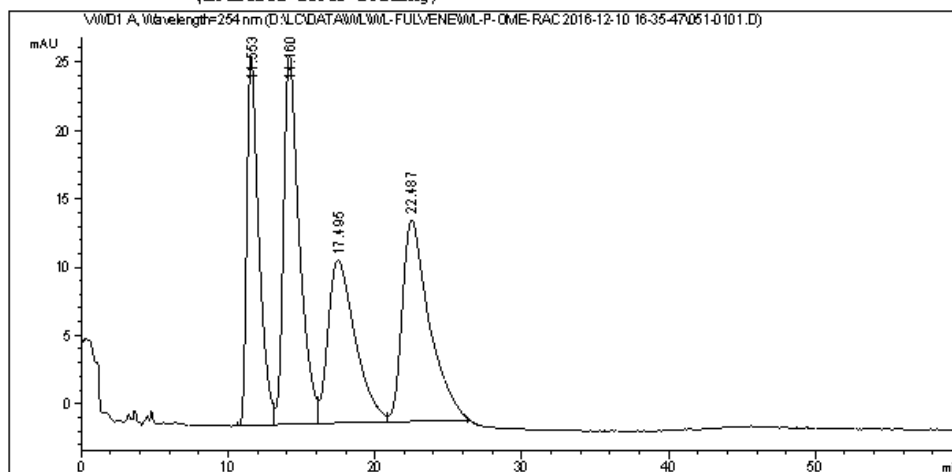

```
=====
                        Area Percent Report
=====
```

```
Sorted By      :      Signal
Multiplier     :      1.0000
Dilution       :      1.0000
Use Multiplier & Dilution Factor with ISTDs
```

Signal 1: VMD1 A, Wavelength=254 nm

| Peak # | RetTime [min] | Type | Width [min] | Area mAU   | Height [mAU] | Area %  |
|--------|---------------|------|-------------|------------|--------------|---------|
| 1      | 11.553        | EB   | 0.8068      | 1538.50391 | 26.96998     | 22.0773 |
| 2      | 14.160        | EV   | 1.0342      | 2018.63831 | 26.99029     | 28.9672 |
| 3      | 17.495        | VV   | 1.5073      | 1528.81152 | 11.91370     | 21.9382 |
| 4      | 22.487        | VB   | 1.5151      | 1882.75879 | 14.75334     | 27.0173 |

Instrument 1 11/20/2017 7:13:56 PM SXS

Page 1 of 2

Data File D:\LC\DATA\WL\WL-FULVENE\WL-P-OME-OPT 2016-12-12 09-48-11\052-0101.D  
Sample Name: WL-p-OMe-OPT

```
=====
Acq. Operator   : LHC                      Seq. Line :    1
Acq. Instrument : Instrument 1              Location  : Vial 52
Injection Date  : 12/12/2016 9:49:21 AM    Inj       :    1
                                           Inj Volume: 5 µl
Acq. Method     : D:\LC\DATA\WL\WL-FULVENE\WL-P-OME-OPT 2016-12-12 09-48-11\AS-75-25-40MIN-
                                           245NM.M
Last changed    : 11/16/2016 3:54:18 PM by LHC
Analysis Method : D:\LC\DATA\WL\WL-FULVENE\WL-P-OME-OPT 2016-12-12 09-48-11\052-0101.D\DA.M
                                           (AS-75-25-40MIN-245NM.M)
Last changed     : 11/20/2017 7:12:55 PM by SXS
                                           (modified after loading)
=====
```

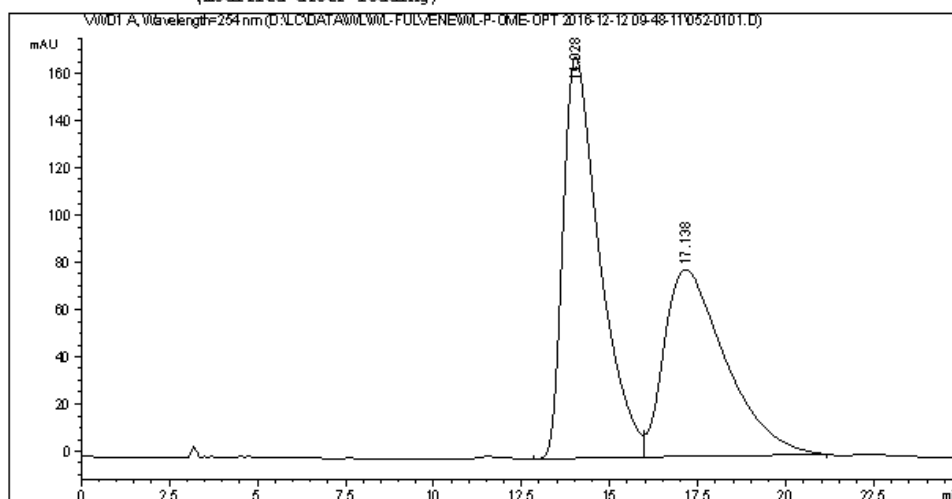

=====  
Area Percent Report  
=====

```
Sorted By      :      Signal
Multiplier     :      1.0000
Dilution       :      1.0000
Use Multiplier & Dilution Factor with ISTDs
```

Signal 1: VMD1 A, Wavelength=254 nm

| Peak # | RetTime [min] | Type | Width [min] | Area mAU   | Height [mAU] | Area %  |
|--------|---------------|------|-------------|------------|--------------|---------|
| 1      | 14.028        | VV   | 1.0577      | 1.22597e4  | 170.11163    | 55.9214 |
| 2      | 17.138        | VB   | 1.6252      | 9663.42773 | 79.31624     | 44.0786 |

Totals :                      2.19232e4    249.42787

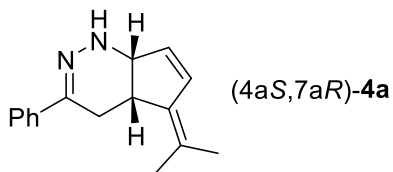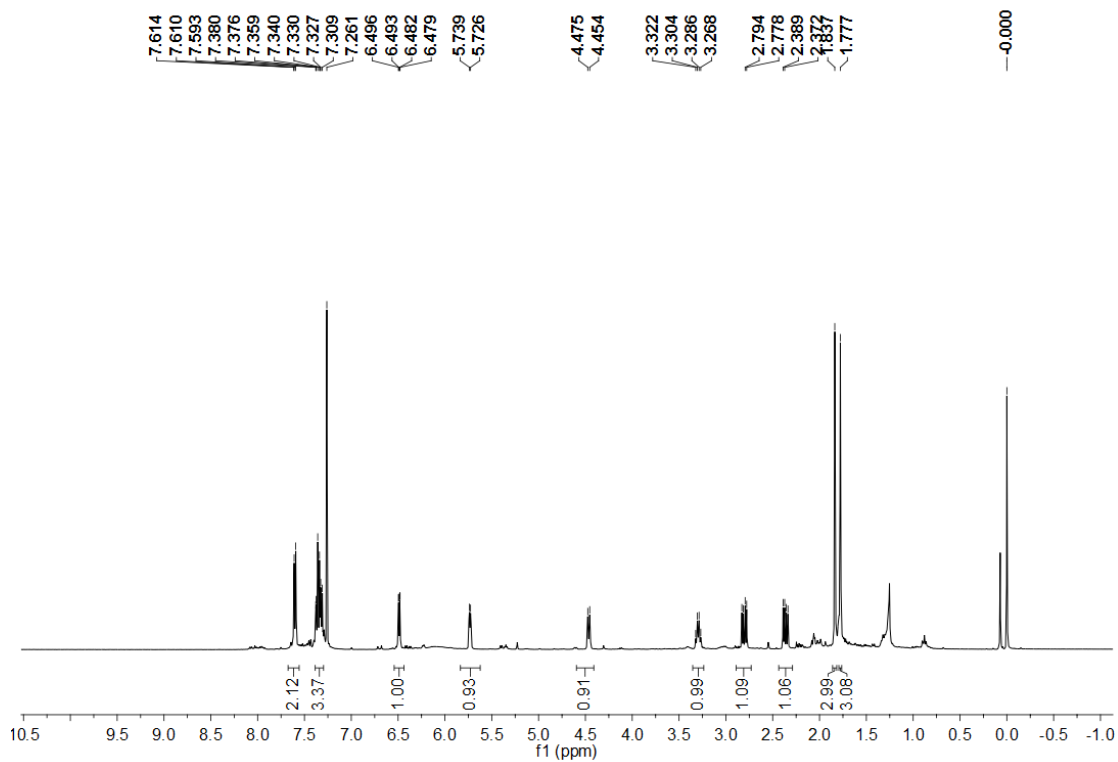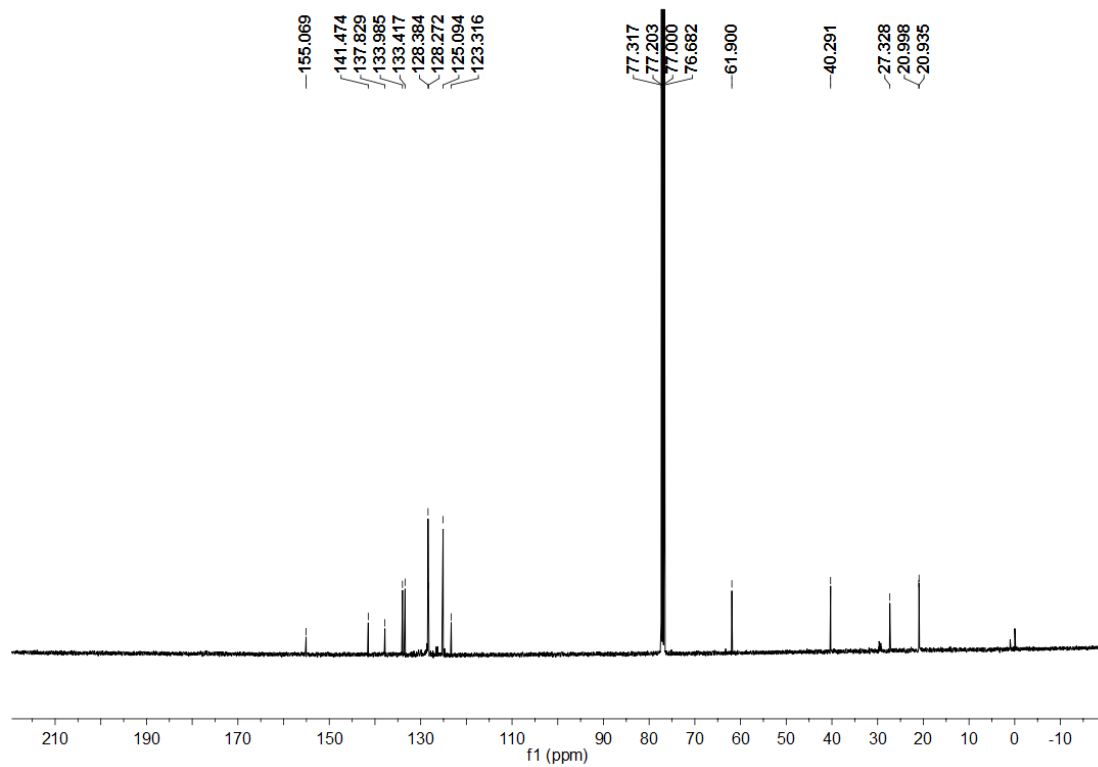

Data File E:\DATA\ZQ\ZQ-10-63\ZQ-10-63 2018-01-19 18-03-33\CC-3-92-2-OPT.D  
Sample Name: ZQ-10-63-rac

```
=====
Acq. Operator   : SYSTEM                      Seq. Line :    1
Acq. Instrument : 1260                      Location  :   71
Injection Date  : 1/19/2018 6:05:01 PM      Inj       :    1
                                           Inj Volume: 5.000 µl

Acq. Method     : E:\DATA\ZQ\ZQ-10-63\ZQ-10-63 2018-01-19 18-03-33\AD-80-20-254NM-15MIN.M
Last changed    : 1/19/2018 6:18:15 PM by SYSTEM
                  (modified after loading)
Analysis Method : E:\DATA\ZQ\ZQ-10-63\ZQ-10-63 2018-01-19 18-03-33\AD-80-20-254NM-15MIN.M (
                  Sequence Method)
Last changed    : 1/30/2018 5:36:34 PM by SYSTEM
                  (modified after loading)
Additional Info : Peak(s) manually integrated
```

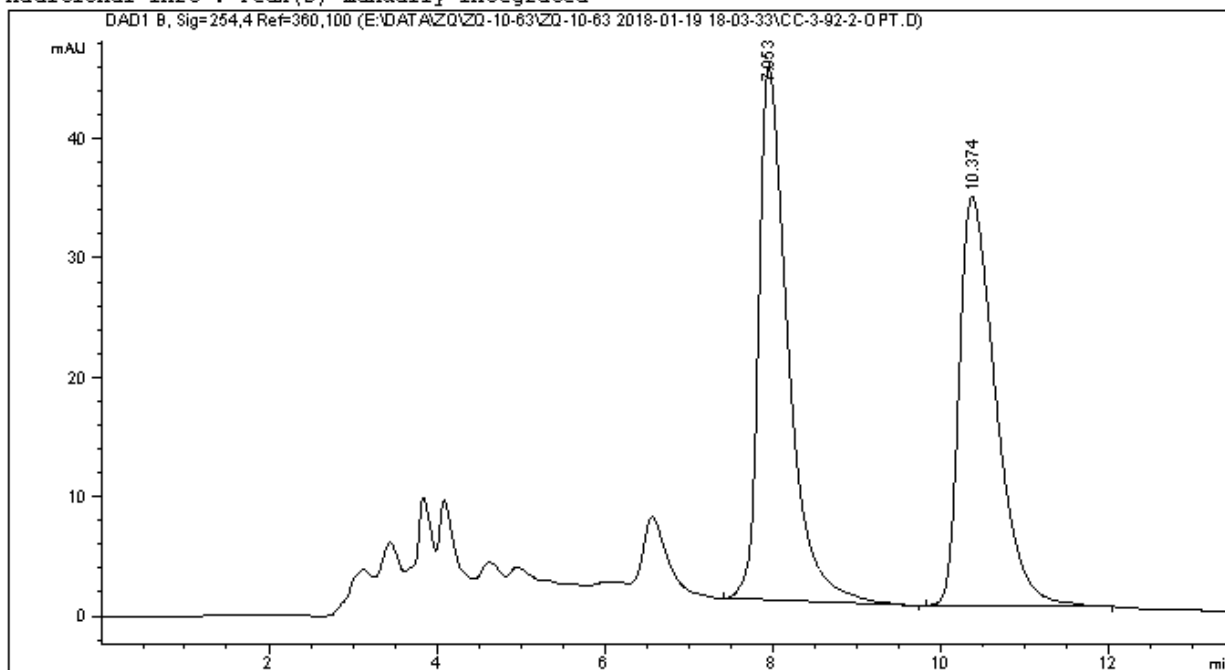

=====  
Area Percent Report  
=====

Sorted By : Signal  
Multiplier : 1.0000  
Dilution : 1.0000  
Do not use Multiplier & Dilution Factor with ISTDs

Signal 1: DAD1 B, Sig=254,4 Ref=360,100

| Peak # | RetTime [min] | Type | Width [min] | Area [mAU*s] | Height [mAU] | Area %  |
|--------|---------------|------|-------------|--------------|--------------|---------|
| 1      | 7.953         | BB   | 0.3615      | 1083.79163   | 44.59405     | 51.2522 |
| 2      | 10.374        | BB   | 0.4594      | 1030.83118   | 34.31964     | 48.7478 |

Totals : 2114.62280 78.91369

Data File E:\DATA\ZQ\ZQ-10-63\ZQ-10-63 2018-01-18 21-47-39\XSM 20180118.D  
Sample Name: ZQ-10-63-opt

```
=====
Acq. Operator   : SYSTEM                      Seq. Line :    1
Acq. Instrument : 1260                      Location  :   79
Injection Date  : 1/18/2018 9:49:12 PM      Inj       :    1
                                           Inj Volume: 10.000 µl
Acq. Method     : E:\DATA\ZQ\ZQ-10-63\ZQ-10-63 2018-01-18 21-47-39\AD-80-20-254NM-15MIN.M
Last changed    : 1/18/2018 10:02:47 PM by SYSTEM
                  (modified after loading)
Analysis Method : E:\DATA\ZQ\ZQ-10-63\ZQ-10-63 2018-01-18 21-47-39\AD-80-20-254NM-15MIN.M (
                  Sequence Method)
Last changed    : 1/30/2018 5:41:09 PM by SYSTEM
                  (modified after loading)
Additional Info : Peak(s) manually integrated
```

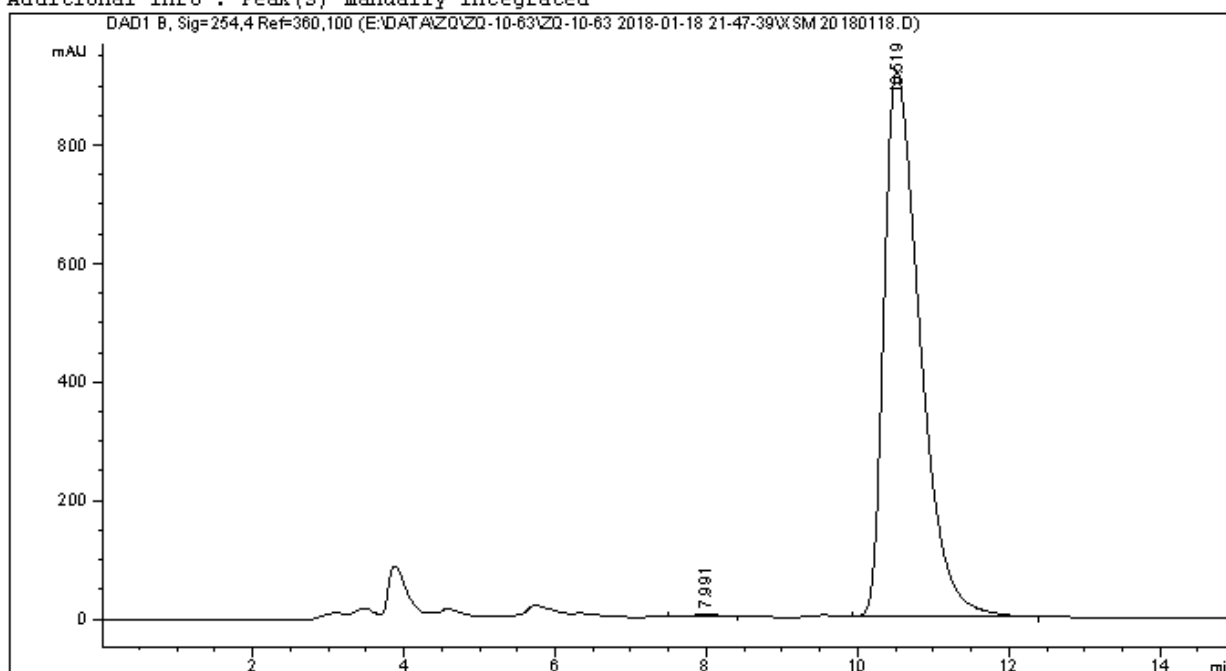

=====  
Area Percent Report  
=====

```
Sorted By      :      Signal
Multiplier     :      1.0000
Dilution       :      1.0000
Do not use Multiplier & Dilution Factor with ISTDs
```

Signal 1: DAD1 B, Sig=254,4 Ref=360,100

| Peak # | RetTime [min] | Type | Width [min] | Area [mAU*s] | Height [mAU] | Area %  |
|--------|---------------|------|-------------|--------------|--------------|---------|
| 1      | 7.991         | BB   | 0.3144      | 111.74111    | 4.45842      | 0.3669  |
| 2      | 10.519        | BB   | 0.4973      | 3.03478e4    | 921.28625    | 99.6331 |

Totals :                      3.04595e4    925.74467

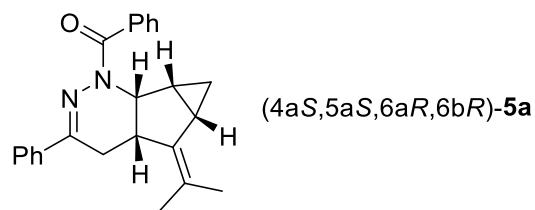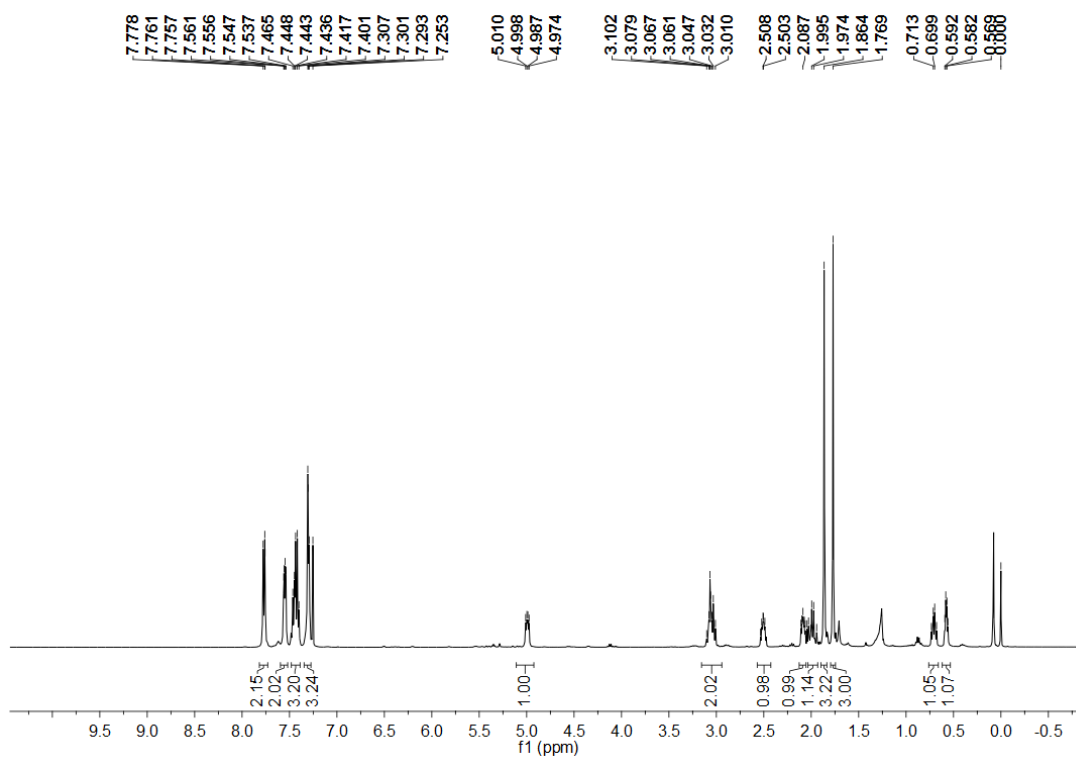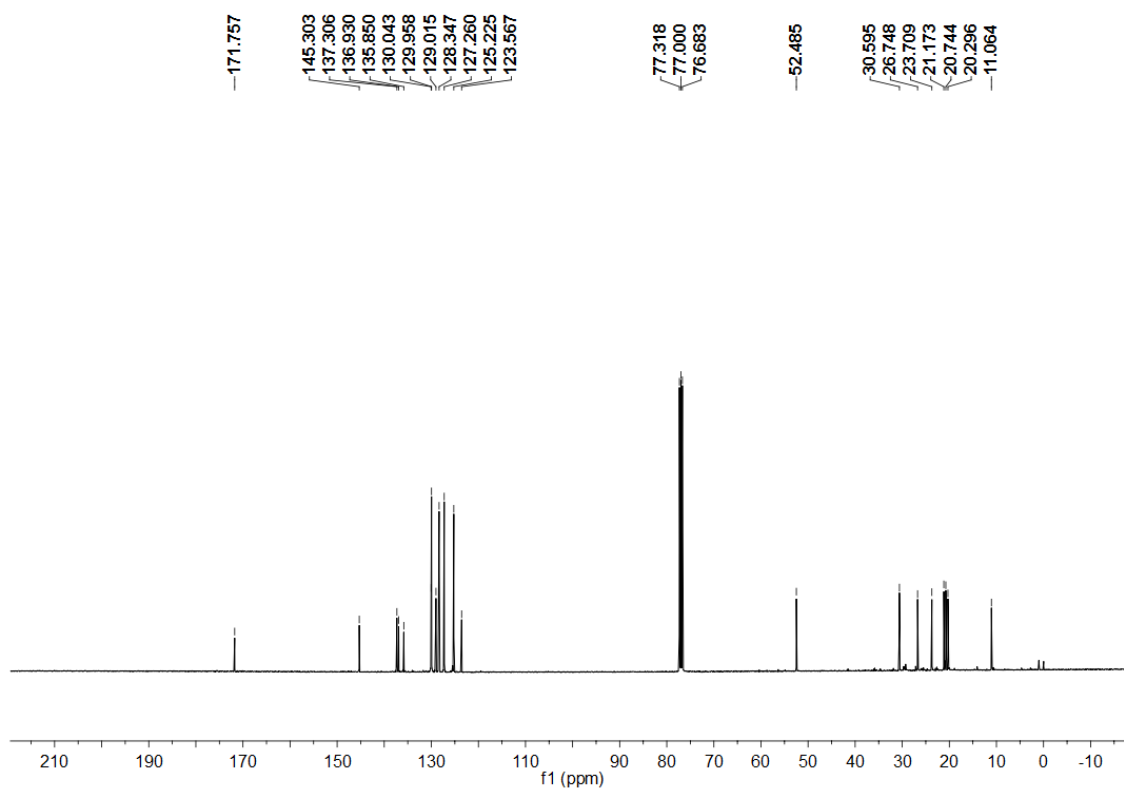



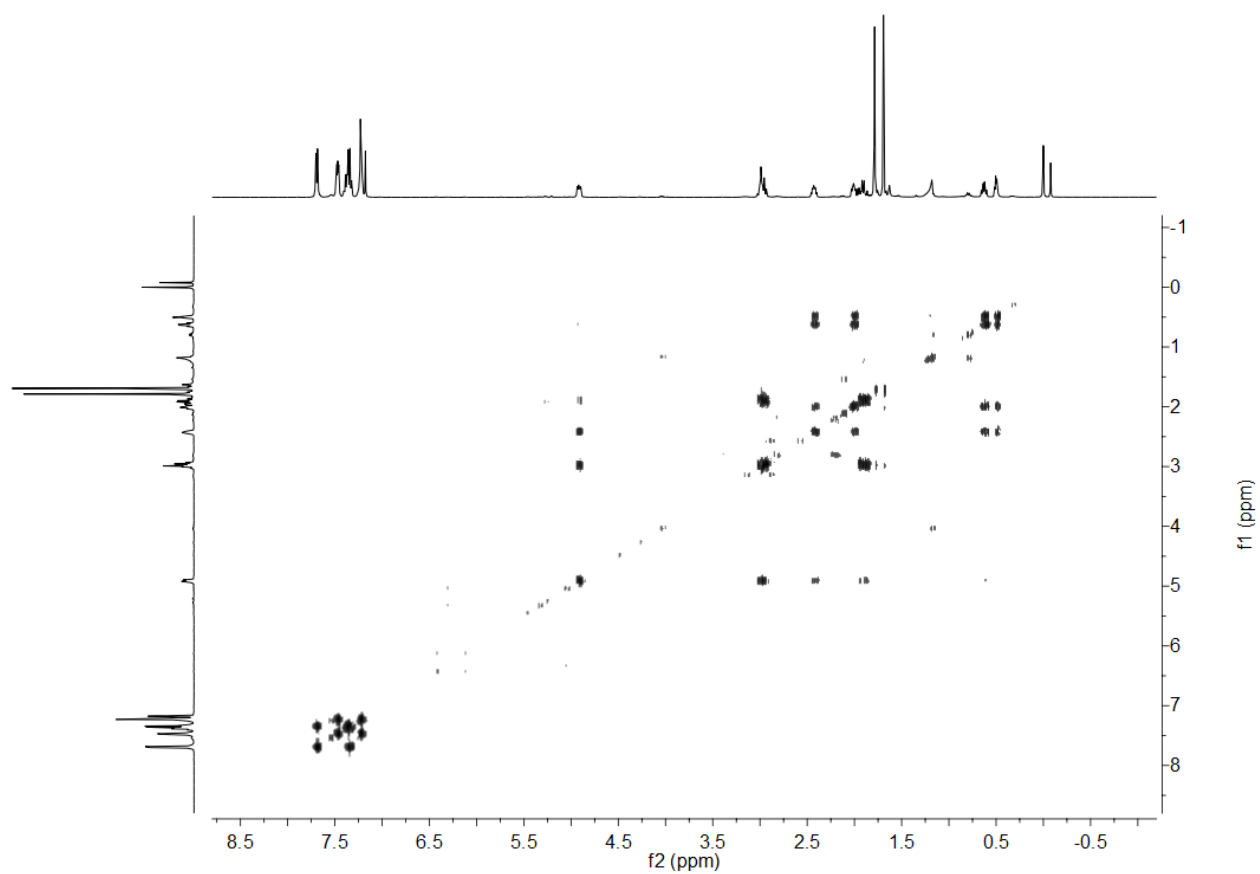

Data File E:\DATA\WL\WL-18-86\WL-18-86L 2018-01-27 00-02-06\WL-18-861.D  
Sample Name: HUANBINGWAN-RAC

```
=====
Acq. Operator   : SYSTEM                      Seq. Line :    2
Acq. Instrument : L260                      Location  :   98
Injection Date  : 1/27/2018 12:30:02 AM      Inj       :    1
                                           Inj Volume: 5.000 µl

Acq. Method     : E:\DATA\WL\WL-18-86\WL-18-86L 2018-01-27 00-02-06\AdH-90-10-254NM-25min.M
Last changed    : 1/27/2018 12:45:10 AM by SYSTEM
                  (modified after loading)
Analysis Method : E:\DATA\WL\WL-18-86\WL-18-86L 2018-01-27 00-02-06\AdH-90-10-254NM-25min.M (
                  Sequence Method)
Last changed    : 1/30/2018 4:36:22 PM by SYSTEM
                  (modified after loading)
Additional Info : Peak(s) manually integrated
=====
```

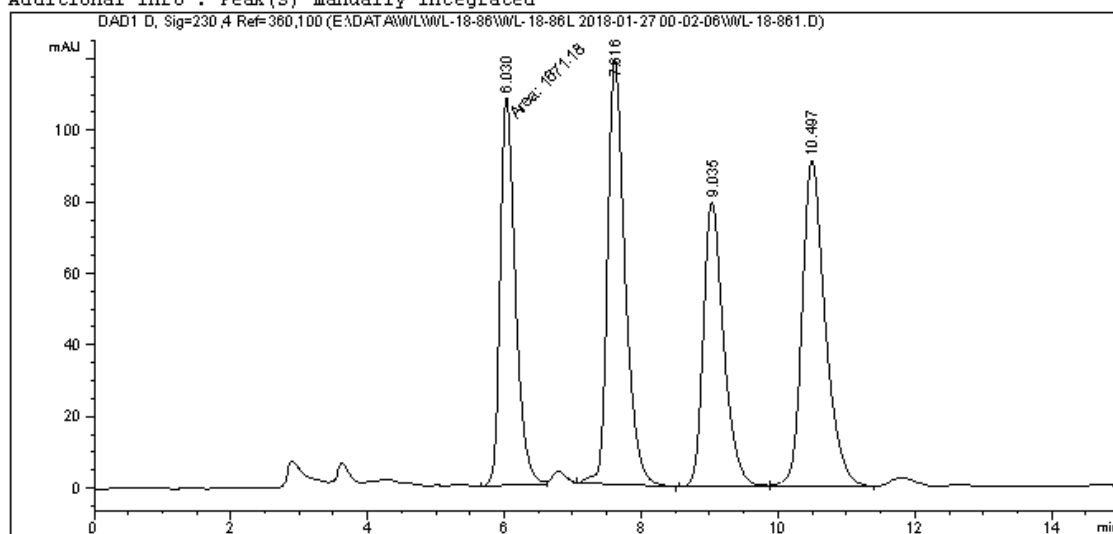

=====  
Area Percent Report  
=====

```
Sorted By      :      Signal
Multiplier     :      1.0000
Dilution       :      1.0000
Do not use Multiplier & Dilution Factor with ISTDs
```

Signal 1: DAD1 D, Sig=230,4 Ref=360,100

| Peak # | RetTime [min] | Type | Width [min] | Area [mAU*s] | Height [mAU] | Area %  |
|--------|---------------|------|-------------|--------------|--------------|---------|
| 1      | 6.030         | MF   | 0.2571      | 1671.18250   | 108.33324    | 22.2053 |
| 2      | 7.616         | BB   | 0.2681      | 2109.69629   | 118.28862    | 28.0320 |
| 3      | 9.035         | BB   | 0.3079      | 1625.44397   | 79.37770     | 21.5976 |
| 4      | 10.497        | BB   | 0.3515      | 2119.71777   | 90.76039     | 28.1651 |

Totals :                    7526.04053   396.75995

Data File E:\DATA\WL\WL-18-86\WL-18-86L 2018-01-27 00-02-06\WL-18-863.D  
Sample Name: HUANBINGWAN-OPT-2

```
=====
Acq. Operator   : SYSTEM                      Seq. Line :    4
Acq. Instrument : 1260                      Location  :   100
Injection Date  : 1/27/2018 1:03:18 AM      Inj       :    1
                                           Inj Volume: 5.000 µl
Acq. Method     : E:\DATA\WL\WL-18-86\WL-18-86L 2018-01-27 00-02-06\AdH-90-10-254NM-25min.M
Last changed    : 1/27/2018 12:45:10 AM by SYSTEM
Analysis Method : E:\DATA\WL\WL-18-86\WL-18-86L 2018-01-27 00-02-06\AdH-90-10-254NM-25min.M (
                  Sequence Method)
Last changed    : 1/30/2018 4:39:07 PM by SYSTEM
                  (modified after loading)
Additional Info : Peak(s) manually integrated
=====
```

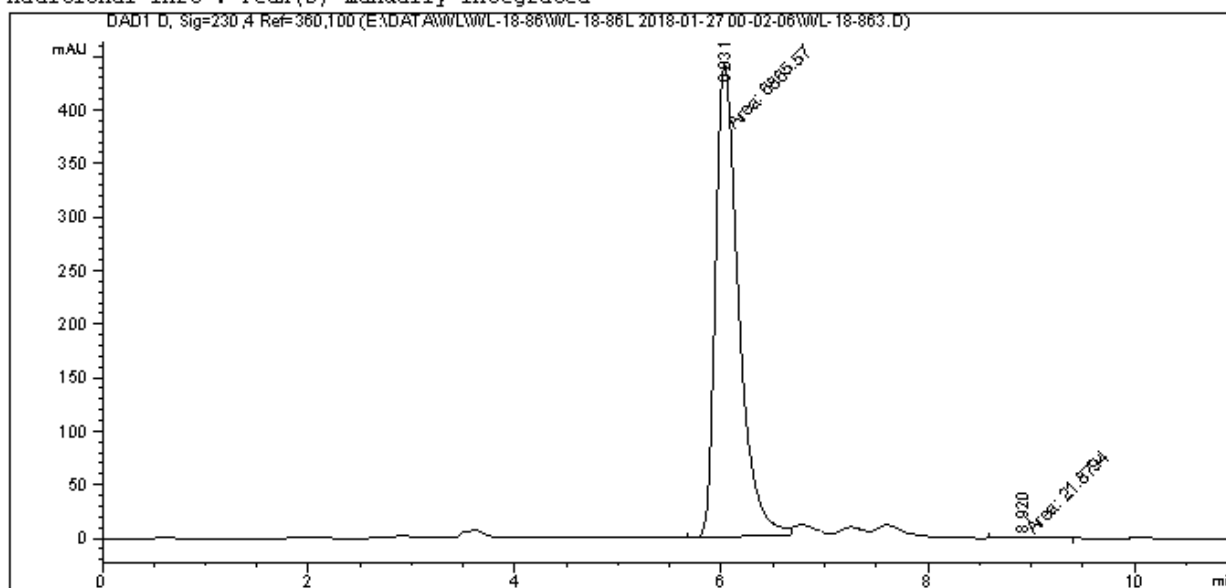

=====  
Area Percent Report  
=====

Sorted By : Signal  
Multiplier : 1.0000  
Dilution : 1.0000  
Do not use Multiplier & Dilution Factor with ISTDs

Signal 1: DAD1 D, Sig=230,4 Ref=360,100

| Peak # | RetTime [min] | Type | Width [min] | Area [mAU*s] | Height [mAU] | Area %  |
|--------|---------------|------|-------------|--------------|--------------|---------|
| 1      | 6.031         | MF   | 0.2593      | 6865.56592   | 441.22797    | 99.6823 |
| 2      | 8.920         | MM   | 0.3964      | 21.87943     | 9.19872e-1   | 0.3177  |

Totals : 6887.44534 442.14784

=====  
\*\*\* End of Report \*\*\*
